# Supplementary material for: A genome-wide multiphenotypic association analysis identified candidate genes and gene ontology shared by four common risky behaviors
Source: Aging (Albany NY). 2020 Feb 22;12(4):3287–97. doi: 10.18632/aging.102812 (PMC7066886; doi:10.18632/aging.102812)
Supplement: Supplementary Table 1 [file aging-12-102812-s006..xlsx]

## Sheet: Table S1
Table S1. List of the four risky behaviors associated rSNPs and corresponding genes
Rs_ID	Related regulatory elements	Target genes
rs62055515	Topologically associated domain	PLEKHM1
rs76659130	Topologically associated domain	ENSG00000259097,SETD3
rs7915816	circRNA region
rs9641538	Topologically associated domain	TFEC
rs2668665	circRNA region,Chromatin interactive region	KANSL1-AS1
rs11867517	circRNA region,Topologically associated domain	CEP112,LINC00511,ENSG00000267659,BPTF,FAM20A,CACNG5,LRRC37A3,HELZ,MAP2K6
rs34731314	circRNA region
rs12538134	circRNA region,Topologically associated domain	CARD11,SDK1
rs12537325	circRNA region,Topologically associated domain	CARD11,SDK1
rs79772576	Chromatin interactive region	KANSL1-AS1
rs241000	Topologically associated domain	SLC22A16,LAMA4,ENSG00000226440,FYN
rs6769144	circRNA region,Topologically associated domain	ENSG00000239268,LSAMP
rs13386862	Topologically associated domain,Chromatin interactive region	CAMKMT,PLEKHH2,SIX3-AS1
rs4722667	circRNA region,Topologically associated domain	SDK1
rs7591265	Topologically associated domain	SLC9A2
rs6569342	circRNA region,Topologically associated domain	ENSG00000271860
rs631248	circRNA region
rs10742196	circRNA region,Topologically associated domain	BDNF-AS,ENSG00000254530
rs780109	circRNA region,Topologically associated domain	ATAD2B
rs56289364	Topologically associated domain	PLEKHM1
rs240981	circRNA region
rs1662058	circRNA region
rs866001	Topologically associated domain	IGSF11,LSAMP
rs704795	circRNA region,Topologically associated domain	ATAD2B
rs332828	circRNA region
rs4627402	Topologically associated domain	PLEKHM1
rs12325113	Chromatin interactive region,TF binding region	ENSG00000260570
rs7115228	circRNA region
rs3740386	circRNA region
rs843087	circRNA region
rs17564703	lncRNA region
rs6703787	circRNA region,Chromatin interactive region	ENSG00000233246
rs10888778	circRNA region,Topologically associated domain	ZYG11B,RAB3B,TCEANC2,LRP8,USP24,YIPF1,TTC39A
rs6415253	circRNA region
rs7208663	circRNA region,Topologically associated domain	PRKCA,CEP112,ENSG00000267659,BPTF,HELZ,MAP2K6
rs12918548	circRNA region
rs62641967	circRNA region,Topologically associated domain	MAPT
rs62054832	Topologically associated domain	PLEKHM1
rs2053979	Topologically associated domain	DGKZ
rs6867204	circRNA region,Chromatin interactive region	ENSG00000250156
rs7087459	circRNA region,Chromatin interactive region	RPF1
rs2657191	circRNA region
rs79301522	circRNA region,Chromatin interactive region	RNU7-101P
rs17699522	Topologically associated domain	ENSG00000259097,SETD3
rs1442479	circRNA region
rs62060793	circRNA region
rs11643079	circRNA region
rs12540385	circRNA region,Topologically associated domain	CARD11,SDK1
rs7843666	Topologically associated domain	PRSS51,BLK,SOX7,ENSG00000258724,PINX1
rs62036614	Chromatin interactive region	ATXN2L,ENSG00000260796
rs10068905	circRNA region
rs540606	Topologically associated domain	CAMKMT,PLEKHH2
rs1022732	Chromatin interactive region	ENSG00000233293
rs727644	circRNA region
rs62055502	Topologically associated domain	PLEKHM1
rs113434679	circRNA region
rs9383922	Topologically associated domain	LAMA2,ADGB,SYNE1,PLEKHG1,CCDC170
rs4923554	Topologically associated domain	BDNF-AS,ENSG00000254530
rs11923343	Topologically associated domain	CADM2,LINC00971,ZNF717
rs7186296	circRNA region
rs3779530	circRNA region
rs7116320	circRNA region
rs62063681	circRNA region
rs1024993	Topologically associated domain	ENSG00000253693,ENSG00000241956,TENM2,WWC1
rs28442075	TF binding region,lncRNA region	ENSG00000247416
rs62054857	Topologically associated domain	PLEKHM1
rs17770108	Chromatin interactive region	MAPT
rs10748837	circRNA region
rs71238846	circRNA region,Topologically associated domain	JUP,CA10,PLEKHM1
rs66680800	circRNA region
rs2016786	circRNA region
rs13221852	circRNA region
rs284863	circRNA region
rs10838776	circRNA region
rs10093993	circRNA region
rs12665591	circRNA region,Topologically associated domain	ENSG00000271860
rs11783065	circRNA region,TF binding region	ENSG00000255518
rs7156747	Topologically associated domain	ENSG00000259097,SETD3
rs3791137	circRNA region
rs6985109	Topologically associated domain	XKR6
rs7749823	circRNA region,Topologically associated domain,Chromatin interactive region,TF binding region	RPL18,CTTNBP2NL,,SLC9A8,LDHA,RNMT,MAEA,AAR2,RNU4ATAC,FAM210A,HMGN4,ENSG00000261766,ENSG00000270006,ZNF184,DDX39B-AS1,SLC2A3,TRIM44,C9orf147,PRIM2,SPRED2,H2AFX,CREB3L4,ENSG00000228661,LSM1,GNL1,GABPB2,MTERFD1,SNORA7A,SMIM15,SPTLC2,ENSG00000254483,STIM1,DCDC2,AP4M1,KIAA0753,BCL2L12,EARS2,ZNF787,ENSG00000254876,ABT1,TIAL1,RHCE,FCHSD2,NFE2L1,VGLL4,MRPL48,ENSG00000234816,ENSG00000255036,ENSG0000026384…
rs1372680	lncRNA region
rs12803191	circRNA region
rs8046545	circRNA region
rs7620339	circRNA region
rs10514897	circRNA region
rs10786713	TF binding region	CYP17A1
rs6939063	circRNA region
rs62061766	circRNA region
rs4425043	circRNA region
rs62056781	TF binding region,lncRNA region	MAPT-AS1
rs1459071	Topologically associated domain	ENSG00000253693,ENSG00000241956,TENM2,WWC1
rs2356016	Topologically associated domain	BDNF-AS,ENSG00000254530
rs62065378	circRNA region,Topologically associated domain	JUP,CA10,PLEKHM1
rs62060853	circRNA region
rs4791295	Chromatin interactive region	C17orf58
rs1525557	circRNA region,Topologically associated domain	SDK1
rs7561317	Topologically associated domain	MYT1L
rs12451721	circRNA region,Topologically associated domain	PRKCA,CEP112,ENSG00000267659,BPTF,FAM20A,FOXK2,HELZ,SMURF2,MAP2K6
rs13107511	Chromatin interactive region	ENSG00000246560
rs4923466	Topologically associated domain	BDNF,ENSG00000254530,DCDC1
rs56343551	Topologically associated domain	PLEKHM1
rs9401631	circRNA region,lncRNA region
rs4343999	circRNA region
rs1202229	circRNA region
rs7602534	Chromatin interactive region,TF binding region	CCDC121,TEX14,SNX17,EIF2B4
rs7457935	circRNA region,Topologically associated domain	CARD11,SDK1
rs7623078	circRNA region
rs9379864	circRNA region
rs7218014	circRNA region
rs36114997	circRNA region
rs66975207	lncRNA region
rs111569429	Topologically associated domain	ENSG00000245322,STPG2
rs1487440	circRNA region,Topologically associated domain	ENSG00000271860
rs28770304	circRNA region
rs11493077	Topologically associated domain	LHPP
rs13110790	Topologically associated domain	TLR1,APBB2,TBC1D1,KIAA1239
rs2819334	circRNA region,Chromatin interactive region	KDM4A
rs77527347	Topologically associated domain	MAPT
rs2281877	circRNA region
rs6807926	Topologically associated domain	LSAMP,ENSG00000243276
rs605709	circRNA region
rs7154723	Topologically associated domain	ENSG00000259097,SETD3
rs459147	circRNA region,Chromatin interactive region	REV3L
rs62332760	circRNA region
rs56148300	circRNA region,Topologically associated domain	PRKCA,CEP112,ENSG00000267659,BPTF,HELZ,MAP2K6
rs6467145	circRNA region
rs17660337	circRNA region,Chromatin interactive region	KANSL1-AS1
rs325446	circRNA region
rs1499972	Topologically associated domain	ENSG00000239268,IGSF11,LSAMP
rs10143900	Topologically associated domain	ENSG00000259097,SETD3
rs7823296	Topologically associated domain	XKR6
rs7000535	circRNA region
rs549814	Topologically associated domain	CAMKMT,PLEKHH2
rs55905252	Topologically associated domain	PLEKHM1
rs17496251	circRNA region
rs6909430	circRNA region
rs12415199	circRNA region,Chromatin interactive region	SFXN2
rs1693482	circRNA region
rs6827295	circRNA region
rs3919455	Topologically associated domain	PLEKHM1
rs715326	circRNA region
rs11952470	circRNA region
rs34878490	circRNA region
rs79346219	circRNA region
rs817495	Topologically associated domain	ENSG00000239268,IGSF11,LSAMP
rs817511	Topologically associated domain	IGSF11,LSAMP
rs4493813	circRNA region,Topologically associated domain	CARD11,SDK1
rs12190650	Topologically associated domain	ENSG00000271860
rs62519822	TF binding region	ENSG00000253750
rs79406732	Topologically associated domain	PLEKHM1
rs8093255	Topologically associated domain	DCC,MBD2
rs73168386	circRNA region
rs150021439	Topologically associated domain	ENSG00000246541,ENSG00000245322,SLC39A8,CCSER1,CENPE,PPP3CA,STPG2,MTTP
rs62061851	circRNA region
rs17576200	circRNA region
rs7156486	Topologically associated domain	ENSG00000259097,SETD3
rs72934586	Topologically associated domain	WDR7
rs62261691	Topologically associated domain	EIF4E3,CADM2,ENSG00000239440
rs3132389	Chromatin interactive region	ZNF311
rs1919208	circRNA region
rs3811348	circRNA region
rs2122042	circRNA region
rs11151372	lncRNA region
rs2819339	circRNA region
rs17651134	circRNA region,Topologically associated domain	MAPT
rs12201246	circRNA region,Topologically associated domain	ENSG00000271860
rs6707646	circRNA region
rs2365468	circRNA region,Topologically associated domain	CEP112,LINC00511,ENSG00000267659,BPTF,FAM20A,CACNG5,LRRC37A3,HELZ,MAP2K6
rs1837016	circRNA region,Chromatin interactive region	MIR1538
rs76924476	circRNA region,Chromatin interactive region	KANSL1-AS1
rs13068788	Topologically associated domain	CADM2
rs3779529	circRNA region
rs12185225	circRNA region,TF binding region	ENSG00000262372
rs3206817	circRNA region,Topologically associated domain	PRKCA,CEP112,ENSG00000267659,BPTF,HELZ,MAP2K6
rs242944	Topologically associated domain	PLEKHM1
rs10883839	circRNA region
rs13149518	Topologically associated domain	TLR1,APBB2,TBC1D1,KIAA1239
rs1057233	Topologically associated domain,Chromatin interactive region	ARFGAP2,PACSIN3,CKAP5
rs17660294	circRNA region
rs13186288	Topologically associated domain	ENSG00000253693,ENSG00000241956,TENM2
rs7085598	circRNA region
rs11191435	circRNA region
rs11214437	lncRNA region
rs62065377	circRNA region,Topologically associated domain	JUP,CA10,PLEKHM1
rs75412750	circRNA region
rs12150127	circRNA region
rs7359397	Chromatin interactive region,lncRNA region	TUFM,,RABEP2
rs1662052	circRNA region
rs10193706	Topologically associated domain	TEX41,ARHGAP15
rs4286835	circRNA region
rs4463269	Topologically associated domain	LAMA2,ADGB,SYNE1,PLEKHG1,CCDC170
rs169201	circRNA region
rs13383034	Topologically associated domain,Chromatin interactive region	CAMKMT,PLEKHH2,SIX3-AS1
rs6834187	Topologically associated domain	N4BP2,TLR1,APBB2,TBC1D1
rs12780440	circRNA region
rs1693476	circRNA region
rs528483	Topologically associated domain	CAMKMT,PLEKHH2
rs62063777	circRNA region,Topologically associated domain,lncRNA region	MAPT
rs1093462	Topologically associated domain	IGSF11,LSAMP
rs12537549	circRNA region,Topologically associated domain	CARD11,SDK1
rs10034048	circRNA region
rs62054823	Topologically associated domain	PLEKHM1
rs12577364	Topologically associated domain	BDNF-AS,ENSG00000254530
rs12497036	Topologically associated domain	CADM2,ENSG00000239440
rs66827971	Chromatin interactive region,TF binding region	ENSG00000215979,BTN3A2
rs4607498	circRNA region,Topologically associated domain	CARD11,SDK1
rs62263923	Topologically associated domain	CADM2,LINC00971,ZNF717
rs3135311	TF binding region,lncRNA region	ZNF90P2,
rs1549214	Topologically associated domain	ENSG00000253693,ENSG00000241956,TENM2
rs7212293	circRNA region,Topologically associated domain	CEP112,LINC00511,ENSG00000267659,BPTF,FAM20A,CACNG5,LRRC37A3,HELZ,MAP2K6
rs6414946	lncRNA region
rs1221986	Topologically associated domain	DCC,MBD2
rs780402	circRNA region
rs2163129	Topologically associated domain,Chromatin interactive region,lncRNA region	KANSL1-AS1,MAPT
rs62061721	lncRNA region
rs7092407	circRNA region,lncRNA region
rs6871136	circRNA region
rs35805829	circRNA region
rs6780616	lncRNA region
rs943038	circRNA region
rs10994934	Topologically associated domain	ZNF365
rs62063798	circRNA region,Topologically associated domain,Chromatin interactive region	STH,MAPT
rs7952220	circRNA region,Topologically associated domain	BDNF-AS,ENSG00000254530
rs429150	Topologically associated domain	TNXB
rs10271582	circRNA region
rs1078268	Topologically associated domain	MAPT
rs7087040	circRNA region
rs780106	circRNA region,Topologically associated domain	ATAD2B
rs10238965	Chromatin interactive region	FAM200A,ZNF655,ENSG00000272647
rs448830	lncRNA region
rs74548327	TF binding region	MAPT-AS1
rs13391837	Topologically associated domain,Chromatin interactive region,TF binding region	ASXL2,NRBP1,PLB1,WDR43,ATAD2B
rs17649954	circRNA region,lncRNA region
rs163521	Topologically associated domain	CAMKMT,PLEKHH2
rs6927284	circRNA region
rs12764388	circRNA region,Topologically associated domain	SH3PXD2A,ENSG00000235470,CCDC147,NEURL1
rs6794831	circRNA region
rs4600827	circRNA region
rs8073510	circRNA region
rs13437771	Topologically associated domain,Chromatin interactive region	DYNC1I1,ENSG00000205236,ENSG00000239521,TRRAP,BUD31,GATS
rs34777615	Chromatin interactive region,lncRNA region	ENSG00000272647
rs35627490	circRNA region
rs7405987	Topologically associated domain	ENSG00000267009,MAP3K3,HELZ,MAP2K6
rs13357015	circRNA region
rs4665978	Topologically associated domain	ASXL2,PLB1,WDR43,ATAD2B
rs2909449	circRNA region
rs141973904	circRNA region
rs7016250	TF binding region	BHLHE22
rs1554500	circRNA region
rs62062321	circRNA region,TF binding region	ENSG00000262372
rs62063303	circRNA region,Topologically associated domain	MAPT
rs58107686	circRNA region,Chromatin interactive region	ZNF362
rs73168397	lncRNA region
rs9913471	circRNA region,Topologically associated domain	CEP112,LINC00511,ENSG00000267659,BPTF,FAM20A,CACNG5,LRRC37A3,HELZ,MAP2K6
rs62084212	circRNA region,Topologically associated domain	CEP112,LINC00511,ENSG00000267659,BPTF,FAM20A,CACNG5,LRRC37A3,HELZ,MAP2K6
rs12647922	Chromatin interactive region	RNU6-450P
rs2970931	circRNA region
rs1987472	Chromatin interactive region,TF binding region,lncRNA region	ATXN2L,ENSG00000260796,ENSG00000240634
rs56077465	circRNA region
rs1488830	Topologically associated domain,lncRNA region	BDNF-AS,ENSG00000246225,ENSG00000254530,SOX6,TTC17,DCDC1,ENSG00000255322,NAV2,PLEKHA7,RRM1,C11orf58,ANO3
rs7926362	Topologically associated domain	BDNF,ENSG00000254530,DCDC1
rs62084234	circRNA region,Topologically associated domain	CEP112,LINC00511,ENSG00000267659,BPTF,FAM20A,CACNG5,LRRC37A3,HELZ,MAP2K6
rs4336505	circRNA region,Topologically associated domain	CARD11,SDK1
rs10838763	circRNA region
rs2860308	Topologically associated domain	ENSG00000239268,IGSF11,LSAMP
rs2696610	circRNA region
rs55925547	circRNA region,Topologically associated domain	JUP,CA10,PLEKHM1
rs9387012	circRNA region
rs12185268	Topologically associated domain	PLEKHM1
rs12448731	circRNA region
rs7570993	Topologically associated domain	MYT1L
rs12472555	circRNA region
rs2272417	circRNA region,Topologically associated domain	ATAD2B
rs62519845	circRNA region
rs2046323	circRNA region,Topologically associated domain,Chromatin interactive region	CEP112,LINC00511,ENSG00000267659,BPTF,FAM20A,CACNG5,LRRC37A3,HELZ,MAP2K6
rs62063677	circRNA region
rs12493341	circRNA region
rs6485773	circRNA region,Chromatin interactive region	FNBP4
rs55685451	lncRNA region
rs564207	Topologically associated domain	CAMKMT,PLEKHH2
rs17651213	circRNA region,Topologically associated domain	MAPT
rs4900386	Topologically associated domain	ENSG00000259097,SETD3
rs34948796	circRNA region,Topologically associated domain,Chromatin interactive region	NOA1,POLR2B
rs75210307	Topologically associated domain	PLEKHM1
rs7922394	circRNA region,Topologically associated domain	ZNF365
rs62063166	circRNA region
rs10260145	circRNA region,Topologically associated domain	SDK1
rs743572	TF binding region	CYP17A1
rs79580365	Chromatin interactive region	MAPT
rs935914	circRNA region,Topologically associated domain	CKAP5
rs6721892	Topologically associated domain	SLC9A2
rs34182576	TF binding region	ENSG00000250156
rs7187333	Chromatin interactive region	SH2B1
rs9880010	Topologically associated domain	CADM2,LINC00971,ZNF717
rs11708024	circRNA region
rs458806	circRNA region
rs1311917	Chromatin interactive region	ENSG00000221191
rs12542037	Topologically associated domain	PRSS51,BLK,SOX7,ENSG00000258724,PINX1
rs34839	circRNA region,Chromatin interactive region	CCDC101
rs12939187	Chromatin interactive region	ARHGAP27
rs8071463	circRNA region,Topologically associated domain	PRKCA,CEP112,ENSG00000267659,BPTF,FAM20A,FOXK2,HELZ,SMURF2,MAP2K6
rs10838754	circRNA region
rs4868048	circRNA region
rs12107172	Topologically associated domain	ENSG00000243347,ZIC1
rs33968162	Topologically associated domain	TLR1,APBB2,TBC1D1,KIAA1239
rs62063299	circRNA region,Topologically associated domain,Chromatin interactive region	MAPT,OSGIN1
rs4630591	circRNA region
rs10883824	circRNA region
rs9986896	Topologically associated domain	SDK1
rs2668622	circRNA region,Chromatin interactive region	ENSG00000261575
rs2588959	Topologically associated domain	ZNF365
rs55895732	Chromatin interactive region	MAPT
rs56387391	Topologically associated domain	PLEKHM1
rs2066899	circRNA region
rs58551145	circRNA region
rs359594	circRNA region,Chromatin interactive region	HSPA5
rs416223	Topologically associated domain	ENSG00000251574
rs325451	circRNA region
rs6974257	circRNA region,Topologically associated domain	CARD11,SDK1
rs4868804	Topologically associated domain	ENSG00000253693,ENSG00000241956,TENM2,WWC1
rs10270365	circRNA region
rs62063306	circRNA region,Topologically associated domain	MAPT
rs13126505	circRNA region
rs111952388	circRNA region
rs4372430	Topologically associated domain	BDNF-AS,ENSG00000254530
rs56358680	circRNA region
rs55893711	circRNA region
rs12444171	circRNA region,Chromatin interactive region	RNU4-1
rs4543938	circRNA region
rs55662347	circRNA region,Topologically associated domain	MAPT
rs846008	circRNA region
rs10767737	Topologically associated domain	BDNF-AS,ENSG00000254530
rs62061812	circRNA region
rs1448613	circRNA region
rs13213152	circRNA region
rs11191602	circRNA region,TF binding region,lncRNA region	NT5C2
rs11940694	Topologically associated domain	TLR1,APBB2,TBC1D1,KIAA1239
rs13114738	Topologically associated domain	ENSG00000245322,SLC39A8,CENPE,BANK1,PPP3CA,STPG2
rs62084681	Topologically associated domain,Chromatin interactive region,TF binding region	ENSG00000267009,MAP3K3,ENSG00000265055,HELZ,KPNA2,MAP2K6
rs62060764	circRNA region
rs11214442	TF binding region	RNU7-187P
rs34148253	circRNA region
rs10951245	circRNA region
rs6978381	circRNA region,Topologically associated domain	CARD11,SDK1
rs8077872	circRNA region,Topologically associated domain	CEP112,LINC00511,ENSG00000267659,BPTF,FAM20A,CACNG5,LRRC37A3,HELZ,MAP2K6
rs7924485	Topologically associated domain	DGKZ
rs9890629	circRNA region,Topologically associated domain	CEP112,LINC00511,ENSG00000267659,BPTF,FAM20A,CACNG5,LRRC37A3,HELZ,MAP2K6
rs118087478	circRNA region,Topologically associated domain	MAPT
rs199520	circRNA region
rs444654	Topologically associated domain	BDNF,ENSG00000254530,DCDC1
rs9824301	Topologically associated domain	EIF4E3,CADM2,ENSG00000239440
rs1922018	circRNA region,Topologically associated domain	SDK1
rs2588965	Topologically associated domain	ZNF365
rs2532329	circRNA region
rs4520584	circRNA region,Topologically associated domain	BDNF-AS,ENSG00000254530
rs33713	circRNA region
rs7205551	circRNA region,Chromatin interactive region	MIR1538
rs8049728	circRNA region
rs4343996	circRNA region,Topologically associated domain,Chromatin interactive region	CARD11,SDK1
rs10835374	circRNA region,Topologically associated domain	BDNF-AS,ENSG00000254530
rs2873269	Topologically associated domain,Chromatin interactive region	PLEKHM1,MAPT
rs2019816	Topologically associated domain	PLEKHM1
rs12643682	Topologically associated domain	N4BP2,TLR1,APBB2,TBC1D1
rs12421563	circRNA region
rs199451	circRNA region
rs62063853	Topologically associated domain	MAPT
rs624244	circRNA region
rs1800547	circRNA region,Topologically associated domain	MAPT
rs34923397	circRNA region
rs1451343	Topologically associated domain	FAXC,ENSG00000271860
rs1375565	Topologically associated domain	CADM2,LINC00971,ZNF717
rs6799997	circRNA region
rs62056777	Chromatin interactive region	MAPT
rs12089622	circRNA region
rs6872276	circRNA region
rs67219198	Topologically associated domain	EIF4E3,CADM2,ENSG00000239440
rs35400317	Chromatin interactive region	HIST1H2AH
rs2732629	circRNA region
rs2945038	circRNA region
rs12550364	Topologically associated domain	SLC26A7,ENSG00000253901,ENSG00000248858
rs1789910	circRNA region
rs199506	circRNA region
rs1260338	circRNA region,Chromatin interactive region	GPN1,,NRBP1
rs17575683	circRNA region
rs10801826	Topologically associated domain	HFM1
rs4462592	circRNA region,Chromatin interactive region	ENSG00000261765
rs72930780	circRNA region
rs79923708	circRNA region
rs56385754	Topologically associated domain,Chromatin interactive region	PLEKHM1,SPPL2C
rs1597750	Topologically associated domain	SLC9A2
rs4343998	circRNA region,Topologically associated domain	CARD11,SDK1
rs34834420	circRNA region
rs56234850	Topologically associated domain,Chromatin interactive region	KANSL1-AS1,MAPT
rs11783331	Topologically associated domain	SLC26A7,ENSG00000253901,ENSG00000248858
rs3020804	circRNA region
rs12768205	circRNA region,lncRNA region
rs1647284	circRNA region,Chromatin interactive region	KRTCAP3
rs1926030	circRNA region
rs12539728	circRNA region
rs1459066	Topologically associated domain	ENSG00000253693,TENM2,WWC1
rs80083342	circRNA region
rs4844694	Topologically associated domain	C1orf132
rs17496334	circRNA region
rs12205529	circRNA region,Topologically associated domain	ENSG00000271860
rs62310771	Topologically associated domain	N4BP2,TLR1,APBB2,TBC1D1
rs12485709	circRNA region
rs13391851	Topologically associated domain	MYT1L
rs77666565	circRNA region
rs11126975	circRNA region
rs12802273	Topologically associated domain,Chromatin interactive region	DGKZ,CELF1
rs415430	circRNA region
rs181163639	Topologically associated domain,lncRNA region	ENSG00000245322,STPG2
rs12219246	Chromatin interactive region	CNNM2,ENSG00000259006,C10orf32-ASMT,C10orf32
rs1625439	circRNA region
rs1817345	Topologically associated domain	ENSG00000259097,SETD3
rs10956807	Topologically associated domain	SLC26A7,ENSG00000253901,ENSG00000248858
rs62065379	circRNA region,Topologically associated domain	JUP,CA10,PLEKHM1
rs62261744	circRNA region
rs62054824	Topologically associated domain	PLEKHM1
rs55877243	Chromatin interactive region	MAPT
rs2055795	Topologically associated domain	PLEKHM1
rs2950834	circRNA region
rs62063779	circRNA region,Topologically associated domain,lncRNA region	MAPT
rs1379251	circRNA region
rs55907036	circRNA region,Topologically associated domain	MAPT
rs113909426	circRNA region
rs62034323	Chromatin interactive region,lncRNA region	ENSG00000261832
rs10182937	circRNA region,Topologically associated domain,Chromatin interactive region	ASXL2,,PLB1,ENSG00000235267,ELP6,ENSG00000272106,ZNF513,CCDC121,PPM1G,MIB2,SUPT7L,WDR43,ATAD2B
rs10742817	circRNA region
rs7836366	TF binding region	ENSG00000248896
rs199497	circRNA region
rs712712	circRNA region
rs111295615	circRNA region
rs35656932	Chromatin interactive region	ZNF192P1,ZSCAN9
rs7569356	Topologically associated domain	SLC9A2
rs13402723	Topologically associated domain	SLC9A2
rs7111576	circRNA region,Chromatin interactive region	FNBP4
rs284858	circRNA region
rs7896547	circRNA region
rs2732615	circRNA region,Chromatin interactive region,lncRNA region	DND1P1,ENSG00000261575
rs113134013	circRNA region,Topologically associated domain	MAPT
rs9899520	circRNA region,Topologically associated domain,Chromatin interactive region	PRKCA,CEP112,ENSG00000267659,BPTF,FAM20A,PRKAR1A,FOXK2,HELZ,SMURF2,MAP2K6
rs9366654	circRNA region,Chromatin interactive region	BTN2A2
rs12714613	Topologically associated domain	CADM2,LINC00971
rs3910713	circRNA region
rs449501	lncRNA region
rs6547589	circRNA region
rs78209533	TF binding region	ENSG00000262881
rs1107674	circRNA region
rs62061719	lncRNA region
rs597403	Topologically associated domain	SLC22A16,LAMA4,ENSG00000226440,FYN
rs199519	circRNA region
rs12602912	circRNA region,Topologically associated domain	CEP112,LINC00511,ENSG00000267659,BPTF,FAM20A,CACNG5,LRRC37A3,HELZ,MAP2K6
rs1093463	Topologically associated domain	IGSF11,LSAMP
rs9826482	circRNA region
rs9323988	Topologically associated domain	ENSG00000259097,SETD3
rs72833340	circRNA region,Topologically associated domain	ZNF365
rs7105791	circRNA region
rs7457146	circRNA region
rs17563718	lncRNA region
rs2080893	circRNA region
rs16884398	circRNA region
rs3131093	Chromatin interactive region	ZNF90P2
rs34016998	circRNA region,Topologically associated domain	PLB1,ATAD2B
rs11191527	circRNA region
rs10786733	circRNA region
rs1381288	Topologically associated domain	ENSG00000259097,SETD3
rs2883826	Topologically associated domain	BDNF-AS,ENSG00000254530
rs6842066	Topologically associated domain	N4BP2,TLR1,APBB2,TBC1D1
rs66757203	circRNA region,Chromatin interactive region	BTN2A3P
rs55876153	Topologically associated domain,Chromatin interactive region	DGKZ,CELF1
rs4244537	circRNA region,Topologically associated domain	BDNF-AS,ENSG00000254530
rs10956804	circRNA region
rs34166054	Chromatin interactive region	ENSG00000272009
rs359592	circRNA region,Chromatin interactive region	RNU6-1020P
rs9371536	Topologically associated domain	LAMA2,ADGB,SYNE1,PLEKHG1,CCDC170
rs199536	circRNA region
rs34739559	Topologically associated domain	PLEKHM1
rs12675694	Topologically associated domain	SLC26A7,ENSG00000253901,ENSG00000248858
rs12995480	Chromatin interactive region	LINC00910
rs11897554	circRNA region,Chromatin interactive region	SNX17
rs34495106	Topologically associated domain	CADM2,LINC00971,ZNF717
rs56005713	circRNA region,Topologically associated domain	JUP,CA10,PLEKHM1
rs10218853	circRNA region
rs9388329	circRNA region,Topologically associated domain	ENSG00000271860
rs62264770	circRNA region
rs17651093	circRNA region,Topologically associated domain	MAPT
rs58583807	circRNA region
rs116203444	circRNA region
rs62055559	Chromatin interactive region	MAPT
rs1612735	circRNA region
rs7811384	circRNA region
rs4652870	Chromatin interactive region	ENSG00000233246
rs13387091	Topologically associated domain	MYT1L
rs1966410	circRNA region
rs56398500	Topologically associated domain	PLEKHM1
rs13030973	Topologically associated domain,lncRNA region	PLB1
rs55673340	Topologically associated domain	PLEKHM1
rs1807298	circRNA region
rs78534960	circRNA region
rs843075	circRNA region
rs4653111	circRNA region,Chromatin interactive region	ENSG00000256142
rs10274978	circRNA region
rs2028078	circRNA region,Chromatin interactive region	ENSG00000267344,ENSG00000233483
rs17650063	lncRNA region
rs16940672	circRNA region
rs904093	circRNA region
rs2044725	Topologically associated domain	CADM2,LINC00971,ZNF717
rs55677011	lncRNA region
rs11974620	circRNA region,Topologically associated domain	CARD11,SDK1
rs57537843	Topologically associated domain	ENSG00000231200,HS1BP3,ENSG00000233005
rs780088	circRNA region,Topologically associated domain	ATAD2B
rs10499	circRNA region
rs6566233	circRNA region,lncRNA region
rs17089826	circRNA region
rs2047409	circRNA region
rs12545435	Topologically associated domain	SLC26A7,ENSG00000253901,ENSG00000248858
rs509173	circRNA region
rs10254665	circRNA region
rs62063786	Topologically associated domain,Chromatin interactive region	KANSL1-AS1,MAPT
rs10475555	circRNA region
rs11732394	circRNA region,Topologically associated domain	POLR2B
rs13153563	Topologically associated domain	ENSG00000253693,ENSG00000241956,TENM2
rs56002706	circRNA region
rs13129401	Topologically associated domain	TLR1,APBB2,TBC1D1,KIAA1239
rs1154432	circRNA region
rs72934600	Topologically associated domain	TXNL1,WDR7,ENSG00000267327
rs1381279	Topologically associated domain	ENSG00000259097,SETD3
rs2004673	Topologically associated domain,TF binding region	STH,MAPT
rs17660167	circRNA region
rs34910028	circRNA region
rs6959232	circRNA region,Topologically associated domain	CARD11,SDK1
rs9897982	circRNA region,Topologically associated domain	CEP112,LINC00511,ENSG00000267659,BPTF,FAM20A,CACNG5,LRRC37A3,HELZ,MAP2K6
rs56288604	Topologically associated domain	PLEKHM1
rs2842185	circRNA region,Chromatin interactive region	KDM4A
rs9826759	Topologically associated domain	CADM2,LINC00971,ZNF717
rs62061792	circRNA region
rs3818708	Topologically associated domain,Chromatin interactive region,TF binding region	KRT18,BTG1,LRRC58,ENSG00000240661,ENSG00000245904,CCDC147,CYP17A1-AS1,WBP1L,XPNPEP1,ARL3
rs12175163	circRNA region
rs10244158	Topologically associated domain,Chromatin interactive region	TRIM4,TRRAP,ZKSCAN5
rs9891146	circRNA region
rs2356009	circRNA region,Topologically associated domain	BDNF-AS,ENSG00000254530
rs7931459	Topologically associated domain	BDNF-AS,ENSG00000254530
rs1549319	circRNA region
rs10786716	Chromatin interactive region	AS3MT
rs2230683	Chromatin interactive region,TF binding region	ZNF90P2,TRIM27,ENSG00000225595,CHEK2,HSCB,NEK7
rs2235251	circRNA region
rs28568738	circRNA region
rs1442480	circRNA region
rs9685436	Chromatin interactive region	PAICS,PPAT
rs3748387	circRNA region,Topologically associated domain	SMPD3,ENSG00000260537
rs61742093	TF binding region	OR2B2
rs11601173	Topologically associated domain,TF binding region	SPI1,DGKZ
rs12771681	circRNA region,Chromatin interactive region	AS3MT
rs7620825	circRNA region
rs10107145	Topologically associated domain	PRSS51,BLK,SOX7,ENSG00000258724,PINX1
rs3000761	circRNA region
rs199457	circRNA region
rs17577496	circRNA region
rs11743417	Topologically associated domain	ENSG00000253693,TENM2,WWC1
rs13010586	circRNA region,Topologically associated domain	PLB1,ATAD2B
rs12995666	Chromatin interactive region	LINC00910
rs2290850	circRNA region
rs9379855	TF binding region	ENSG00000215979,BTN3A2
rs2097760	circRNA region,Chromatin interactive region	KANSL1-AS1
rs13135092	circRNA region
rs4240672	Topologically associated domain	XKR6
rs4948477	Topologically associated domain	ZNF365
rs10278205	circRNA region
rs79649865	circRNA region
rs17496638	circRNA region,Topologically associated domain	CAMKMT,LRPPRC
rs11640319	circRNA region
rs1143701	circRNA region
rs6504574	Topologically associated domain	ENSG00000267009,MAP3K3,HELZ,MAP2K6
rs4441322	Topologically associated domain	PLEKHM1
rs4318247	circRNA region,Topologically associated domain	PRKCA,CEP112,ENSG00000267659,BPTF,HELZ,MAP2K6
rs13143570	circRNA region
rs62061767	circRNA region
rs1143702	circRNA region
rs12196119	Topologically associated domain	ENSG00000271860
rs2647250	circRNA region,Topologically associated domain	ENSG00000245322,SLC39A8,TET2,TBCK
rs9684742	Chromatin interactive region	PAICS,PPAT
rs62063200	circRNA region
rs9907491	circRNA region,Topologically associated domain	PRKCA,CEP112,ENSG00000267659,BPTF,FAM20A,FOXK2,HELZ,SMURF2,MAP2K6
rs4923546	circRNA region,Topologically associated domain	BDNF-AS,ENSG00000254530
rs17660464	circRNA region,Chromatin interactive region	KANSL1-AS1
rs113551298	Topologically associated domain	N4BP2,TLR1,APBB2,TBC1D1
rs55719714	Topologically associated domain	PLEKHM1
rs17576842	circRNA region
rs10786744	circRNA region
rs10891480	lncRNA region
rs12146565	circRNA region,Topologically associated domain	CKAP5
rs13237048	circRNA region
rs75652502	circRNA region
rs62273364	Topologically associated domain,Chromatin interactive region,TF binding region	ENSG00000241131,ZIC4,ENSG00000243347,ZIC1
rs7124653	Topologically associated domain	BDNF-AS,ENSG00000254530
rs62263123	circRNA region,Topologically associated domain	ENSG00000239268,LSAMP
rs34394411	lncRNA region
rs4992357	circRNA region,Topologically associated domain	CKAP5
rs1476127	lncRNA region
rs1381269	Topologically associated domain	ENSG00000259097,SETD3
rs62061772	circRNA region,Chromatin interactive region	KANSL1-AS1
rs17577650	circRNA region
rs958648	Topologically associated domain	ENPP7P6
rs416340	circRNA region,Topologically associated domain,Chromatin interactive region	GAPVD1,ENSG00000239705
rs753236	Topologically associated domain	PLEKHM1
rs11917003	Topologically associated domain	CADM2,LINC00971,ZNF717
rs13107325	circRNA region
rs3762896	circRNA region
rs11123965	lncRNA region
rs6462030	circRNA region,Topologically associated domain	CARD11,SDK1
rs62086897	Topologically associated domain,Chromatin interactive region	ENSG00000267009,MAP3K3,HELZ,C17orf58,MAP2K6
rs111375528	circRNA region,Topologically associated domain	ENSG00000239268,LSAMP
rs17665188	circRNA region
rs56318865	circRNA region
rs6969407	circRNA region
rs7658539	circRNA region
rs62054843	Topologically associated domain	PLEKHM1
rs11605348	TF binding region	FAM180B
rs817496	Topologically associated domain	ENSG00000239268,IGSF11,LSAMP
rs2568464	circRNA region,Topologically associated domain	XDH,ENSG00000233862,CAPN13
rs62063846	circRNA region,Topologically associated domain	MAPT
rs11690265	Topologically associated domain	ASXL2,PLB1,WDR43,ATAD2B
rs13230698	circRNA region,Topologically associated domain	CARD11,SDK1
rs62061848	circRNA region
rs11191577	circRNA region
rs12489145	circRNA region
rs1693471	circRNA region
rs62084694	circRNA region,Topologically associated domain	ENSG00000267009,MAP3K3,HELZ,MAP2K6
rs55663797	circRNA region,Topologically associated domain	JUP,CA10,PLEKHM1
rs7808934	circRNA region
rs34333163	Topologically associated domain	ENSG00000245322,SLC39A8,CENPE,BANK1,PPP3CA,STPG2
rs430184	circRNA region,Topologically associated domain	GAPVD1
rs13411937	Topologically associated domain	SLC9A2
rs1713675	TF binding region	LRRC37A13P
rs77556698	Topologically associated domain	ENSG00000259097,SETD3
rs149271	TF binding region,lncRNA region	CLN3,APOBR
rs199436	circRNA region
rs2213041	circRNA region
rs6462069	circRNA region
rs17572495	circRNA region,Topologically associated domain,lncRNA region	MAPT
rs284857	circRNA region
rs2356013	Topologically associated domain	BDNF-AS,ENSG00000254530
rs6974577	circRNA region
rs17574796	circRNA region,Chromatin interactive region	KANSL1-AS1
rs1376505	circRNA region
rs7620168	circRNA region
rs150208378	circRNA region
rs2074404	circRNA region
rs7798141	circRNA region
rs2450520	circRNA region
rs4905651	Topologically associated domain	ENSG00000259097,SETD3
rs240963	circRNA region
rs62055554	Chromatin interactive region	MAPT
rs3087681	circRNA region,Chromatin interactive region,TF binding region	BRD2-IT1,IFT122,RNU1-60P,RNVU1-6,NT5C2,ENSG00000233396,SKP2,ZZZ3,MBD4,LMBRD2,HLA-DMA
rs74481389	circRNA region
rs3748386	circRNA region,Topologically associated domain	SMPD3,ENSG00000260537
rs35327136	circRNA region,lncRNA region
rs10819659	lncRNA region
rs66886492	Chromatin interactive region,lncRNA region	HIST1H3J,ZSCAN16,HIST1H2AM
rs10769258	circRNA region,Topologically associated domain	CKAP5
rs72819512	circRNA region
rs35515350	circRNA region
rs12452511	circRNA region
rs62064600	circRNA region
rs2155291	lncRNA region
rs2336897	Topologically associated domain	ENSG00000253693,TENM2,WWC1
rs62063294	circRNA region,Topologically associated domain	MAPT
rs13263261	circRNA region
rs77950913	circRNA region
rs56365901	Chromatin interactive region	MAPT
rs6699397	Topologically associated domain	HFM1
rs78104015	circRNA region,Topologically associated domain	MAPT
rs2293578	circRNA region,Topologically associated domain,lncRNA region	DGKZ
rs17573447	Topologically associated domain	MAPT
rs1026567	Topologically associated domain	ZRANB2-AS2,NEGR1
rs35218591	circRNA region
rs62063780	Topologically associated domain,Chromatin interactive region,lncRNA region	KANSL1-AS1,MAPT
rs199445	circRNA region
rs62264773	circRNA region
rs9490788	Topologically associated domain	ENSG00000271860
rs74509629	lncRNA region
rs12635683	Topologically associated domain	CADM2,LINC00971,ZNF717
rs759843	circRNA region
rs17564020	lncRNA region
rs67040724	Topologically associated domain,TF binding region	GABBR1,OR2W6P
rs7221167	Topologically associated domain	PLEKHM1
rs78238042	Topologically associated domain	PLEKHM1
rs17659953	circRNA region
rs9866968	Topologically associated domain	EIF4E3,CADM2,ENSG00000239440
rs571862	circRNA region
rs2017500	circRNA region
rs62060802	circRNA region
rs2585814	circRNA region,Topologically associated domain	BDNF-AS,ENSG00000254530
rs75257416	circRNA region
rs55900347	circRNA region
rs12373140	Topologically associated domain	PLEKHM1
rs516790	circRNA region
rs56119705	circRNA region
rs7350980	circRNA region
rs62055477	Topologically associated domain	PLEKHM1
rs11191584	circRNA region
rs7010590	Chromatin interactive region	ENSG00000270076
rs6485756	circRNA region,Topologically associated domain	DGKZ
rs173287	circRNA region,Topologically associated domain,TF binding region	SLC22A16,LAMA4,ENSG00000226440,FYN,ENSG00000230177
rs11650332	circRNA region
rs2056475	circRNA region
rs55975673	Topologically associated domain	PLEKHM1
rs10891481	lncRNA region
rs4948290	circRNA region,Topologically associated domain	ZNF365
rs13064386	circRNA region
rs13160227	Topologically associated domain	ENSG00000253693,ENSG00000241956,TENM2,WWC1
rs6823497	Topologically associated domain,Chromatin interactive region	N4BP2,TLR1,LIAS,APBB2,TBC1D1
rs383917	circRNA region
rs34128973	circRNA region
rs11786659	Topologically associated domain	SLC26A7,ENSG00000253901,ENSG00000248858
rs4664442	circRNA region
rs30266	Topologically associated domain	ENSG00000251574
rs2008514	Chromatin interactive region,TF binding region,lncRNA region	ATXN2L,ENSG00000260796,ENSG00000240634
rs12150438	circRNA region
rs10786717	Chromatin interactive region	AS3MT
rs62064660	Topologically associated domain	MAPT
rs13083873	Topologically associated domain	EIF4E3,CADM2,ENSG00000239440
rs10883790	circRNA region
rs62055518	Topologically associated domain	PLEKHM1
rs62086043	circRNA region
rs3758655	circRNA region
rs6760828	circRNA region,Chromatin interactive region,TF binding region	KHK,,PPM1G,NRBP1,OST4,ZBTB4,MPV17,ENSG00000234072,GTF3C2,GPRC5A,POLR2A
rs3131072	Chromatin interactive region	ENSG00000225173
rs1386550	circRNA region,Topologically associated domain	FAXC,ENSG00000271860
rs79782347	circRNA region
rs55881134	circRNA region
rs35833914	circRNA region
rs112707579	Topologically associated domain	FAXC,ENSG00000271860
rs7942723	lncRNA region
rs61439785	circRNA region
rs2892512	circRNA region
rs17690987	Topologically associated domain	PLEKHM1
rs17651483	Topologically associated domain	MAPT
rs592229	Topologically associated domain	HCP5
rs9398724	Topologically associated domain	ENSG00000271860
rs62036626	circRNA region
rs9487626	circRNA region
rs2402867	circRNA region
rs1016271	Topologically associated domain	ENSG00000259097,SETD3
rs62084251	circRNA region,Topologically associated domain,lncRNA region	CEP112,,LINC00511,ENSG00000267659,BPTF,FAM20A,CACNG5,LRRC37A3,HELZ,MAP2K6
rs80020809	circRNA region
rs3777913	circRNA region
rs7213292	circRNA region,Topologically associated domain	PRKCA,CEP112,ENSG00000267659,BPTF,HELZ,MAP2K6
rs10883834	circRNA region
rs62310295	circRNA region,Topologically associated domain	POLR2B
rs4738733	circRNA region
rs13068094	circRNA region,Topologically associated domain	EIF4E3
rs1221969	Topologically associated domain	DCC,MBD2
rs11191556	circRNA region
rs13146782	circRNA region
rs4471726	Chromatin interactive region	ENSG00000267882
rs6926543	circRNA region,Topologically associated domain,Chromatin interactive region	ENSG00000226440,TRAF3IP2-AS1
rs6438436	Topologically associated domain	LSAMP,ENSG00000243276
rs62086044	circRNA region
rs4143310	Topologically associated domain	CAMKMT,PLEKHH2
rs13140033	Chromatin interactive region	ENSG00000246560
rs6554395	Chromatin interactive region	PAICS,PPAT
rs9309986	Topologically associated domain	EIF4E3,CADM2,ENSG00000239440
rs6699731	Topologically associated domain	ZRANB2-AS2,NEGR1
rs780102	circRNA region,Topologically associated domain	ASXL2,PLB1,WDR43,ATAD2B
rs11604680	Topologically associated domain	DGKZ
rs986391	Topologically associated domain	ENSG00000253693,ENSG00000241956,TENM2
rs9680882	Topologically associated domain	ENSG00000243347,ZIC1
rs7942417	Topologically associated domain	BDNF-AS,ENSG00000254530
rs439945	lncRNA region
rs199524	circRNA region,Chromatin interactive region	HIST1H2BD,ENSG00000253744,RPL37
rs17414806	lncRNA region
rs3737983	circRNA region,Topologically associated domain	EPS15,RAB3B,USP24
rs2189010	circRNA region
rs12575096	Topologically associated domain	BDNF,ENSG00000254530,DCDC1
rs1822418	lncRNA region
rs72938314	circRNA region
rs8072225	circRNA region,Topologically associated domain	PRKCA,CEP112,ENSG00000267659,BPTF,HELZ,MAP2K6
rs174376	circRNA region,Chromatin interactive region	TRAF3IP2-AS1
rs55652155	circRNA region,Topologically associated domain	JUP,CA10,PLEKHM1
rs494904	Topologically associated domain	CAMKMT,PLEKHH2
rs62037371	Chromatin interactive region,TF binding region	CD19,ATP2A1,SH2B1
rs6484385	Topologically associated domain	BDNF-AS,ENSG00000254530
rs3811802	circRNA region
rs11127013	circRNA region,Topologically associated domain	ATAD2B
rs3131073	Chromatin interactive region	ENSG00000225173
rs62063171	circRNA region,TF binding region	RNU7-101P
rs7945312	circRNA region
rs62063795	circRNA region,Topologically associated domain,Chromatin interactive region	STH,MAPT
rs17424646	circRNA region,Topologically associated domain	CAMKMT,LRPPRC
rs1406295	circRNA region,Topologically associated domain	ATAD2B
rs8008425	Topologically associated domain	ENSG00000259097,SETD3
rs17772567	Topologically associated domain	ENSG00000259097,SETD3
rs73004659	Topologically associated domain	ENSG00000243347,ZIC1
rs138495951	circRNA region
rs1728912	circRNA region,Topologically associated domain	ATAD2B
rs11039308	Chromatin interactive region	KBTBD4
rs58122682	circRNA region,Topologically associated domain	CEP112,LINC00511,ENSG00000267659,BPTF,FAM20A,CACNG5,LRRC37A3,HELZ,MAP2K6
rs254044	Topologically associated domain	ENSG00000251574
rs2939756	Topologically associated domain	LRRC4C,TTC17
rs10454314	circRNA region
rs62060761	circRNA region
rs34835	circRNA region
rs4851655	Topologically associated domain	SLC9A2
rs284854	circRNA region
rs62063787	Topologically associated domain,Chromatin interactive region	KANSL1-AS1,MAPT
rs715325	circRNA region
rs55942528	Topologically associated domain	PLEKHM1
rs4790908	circRNA region,Topologically associated domain	CEP112,LINC00511,ENSG00000267659,BPTF,FAM20A,CACNG5,LRRC37A3,HELZ,MAP2K6
rs113659074	circRNA region
rs10883823	circRNA region,Chromatin interactive region	CNNM2,
rs71621626	Topologically associated domain	EMCN,ENSG00000245322,ENSG00000248173,BANK1
rs62060838	circRNA region
rs17577094	circRNA region
rs10173167	Topologically associated domain	MYT1L
rs7571957	Topologically associated domain	MYT1L
rs1823601	Topologically associated domain	ENSG00000271860
rs4851659	Topologically associated domain	SLC9A2
rs7112248	circRNA region
rs12150516	Topologically associated domain	PLEKHM1
rs62058968	circRNA region,lncRNA region
rs10514898	circRNA region
rs113145808	Topologically associated domain	BDNF,ENSG00000254530,DCDC1
rs393152	lncRNA region
rs1449402	Topologically associated domain	CADM2,LINC00971,ZNF717
rs709819	circRNA region
rs1344293	Topologically associated domain	ENSG00000271955
rs4149394	circRNA region,Chromatin interactive region	CCDC101
rs13021208	circRNA region,Topologically associated domain	ASXL2,PLB1,ENSG00000231200,DPYSL5,BIRC6,ITSN2,ALK,KLHL29,ENSG00000233862,WDR35,DNAJC27-AS1,MAPRE3,ATAD2B
rs12188494	circRNA region,Chromatin interactive region	ENSG00000250156
rs9400481	circRNA region,Chromatin interactive region	TRAF3IP2-AS1
rs6462083	circRNA region
rs7207582	circRNA region
rs62063202	circRNA region,Chromatin interactive region	RNU7-101P
rs1375564	Topologically associated domain	CADM2,LINC00971,ZNF717
rs10883842	circRNA region
rs55865887	Topologically associated domain	ENSG00000271860
rs7073323	circRNA region
rs111259120	circRNA region
rs8052028	circRNA region
rs7794279	circRNA region,Topologically associated domain,TF binding region	ENSG00000236708,SDK1
rs12150570	circRNA region
rs10914705	lncRNA region
rs2341587	circRNA region
rs653953	circRNA region
rs9320942	Topologically associated domain	ENSG00000271860
rs62055553	Chromatin interactive region	MAPT
rs62054846	Topologically associated domain	PLEKHM1
rs62065374	circRNA region,Topologically associated domain	JUP,CA10,PLEKHM1
rs2232423	circRNA region,Chromatin interactive region	ZSCAN9
rs10006545	Chromatin interactive region	ADH1C
rs11971935	circRNA region,lncRNA region
rs76090253	lncRNA region
rs6885165	circRNA region
rs62086899	Topologically associated domain,Chromatin interactive region	ENSG00000267009,MAP3K3,HELZ,KPNA2,MAP2K6
rs1532401	Topologically associated domain	LAMA2,ADGB,SYNE1,PLEKHG1,CCDC170
rs76324150	TF binding region,lncRNA region	MAPT-AS1
rs11899332	Topologically associated domain	SLC9A2
rs13124271	circRNA region
rs11030399	Topologically associated domain	BDNF-AS,ENSG00000254530
rs62060797	circRNA region
rs11770681	circRNA region,Topologically associated domain	CARD11,SDK1
rs13152711	circRNA region
rs10786745	circRNA region
rs6485763	Chromatin interactive region	KBTBD4
rs10273728	circRNA region
rs434805	lncRNA region
rs17425752	circRNA region
rs1728911	Topologically associated domain,Chromatin interactive region	CCDC121,ASXL2,NRBP1,PLB1,SUPT7L,WDR43,ATAD2B
rs1789916	circRNA region
rs11039200	circRNA region,Topologically associated domain	CKAP5
rs12729364	circRNA region
rs4548919	circRNA region
rs12174623	circRNA region,lncRNA region
rs6415872	Topologically associated domain,TF binding region	ARID5B,ZNF365
rs11030392	Topologically associated domain	BDNF-AS,ENSG00000254530
rs146022132	Topologically associated domain	ENSG00000245322,STPG2
rs117300236	circRNA region
rs1614972	circRNA region
rs17770337	Chromatin interactive region	MAPT
rs62060798	circRNA region
rs62055501	Topologically associated domain	PLEKHM1
rs62261667	Topologically associated domain	EIF4E3,CADM2,ENSG00000239440
rs11821132	circRNA region,Topologically associated domain	BDNF-AS,ENSG00000254530
rs1262430	circRNA region,Topologically associated domain	ASXL2,PLB1,WDR43,ATAD2B
rs62063684	circRNA region
rs1693483	circRNA region
rs10184356	Topologically associated domain	SLC9A2
rs2668694	circRNA region
rs519185	Topologically associated domain	ARHGEF12
rs62056776	Chromatin interactive region	MAPT
rs10008926	circRNA region
rs35498642	circRNA region
rs7238242	Topologically associated domain	DCC,MBD2
rs13195401	circRNA region
rs2904127	circRNA region,TF binding region	ENSG00000271543
rs12576604	circRNA region,Topologically associated domain	BDNF-AS,ENSG00000254530
rs62086904	Topologically associated domain,Chromatin interactive region	LINC00674,ENSG00000267009,MAP3K3,CLIC4,ENSG00000265055,HELZ,SIRT1,MAP2K6
rs2124553	circRNA region,Topologically associated domain	ENSG00000239268,LSAMP
rs17151637	circRNA region
rs11765903	circRNA region
rs2336894	Topologically associated domain	ENSG00000253693,ENSG00000241956,TENM2
rs12631564	circRNA region
rs9383920	Topologically associated domain	LAMA2,ADGB,SYNE1,PLEKHG1,CCDC170
rs2873268	Topologically associated domain,Chromatin interactive region	PLEKHM1,MAPT
rs8020387	Topologically associated domain	ENSG00000259097,SETD3
rs16859444	Topologically associated domain	ENSG00000243347,ZIC1
rs17654016	circRNA region
rs6971287	circRNA region,Topologically associated domain	CARD11,SDK1
rs817509	Topologically associated domain	IGSF11,LSAMP
rs7675916	circRNA region
rs813592	circRNA region
rs2125838	circRNA region
rs1526126	TF binding region	ENSG00000265547,ENSG00000265964
rs2046512	Topologically associated domain	LSAMP,ENSG00000243276
rs1461573	Topologically associated domain	ENSG00000259097,SETD3
rs6922226	circRNA region
rs843084	circRNA region
rs4948487	circRNA region,Topologically associated domain	ZNF365
rs62263118	circRNA region,Topologically associated domain	ENSG00000239268,LSAMP
rs10838771	circRNA region
rs6708478	Topologically associated domain	SLC9A2
rs2869534	circRNA region
rs11499824	TF binding region	ADH1C
rs6967281	circRNA region
rs62310819	Topologically associated domain	TLR1,APBB2,TBC1D1,KIAA1239
rs10838745	circRNA region
rs240988	Topologically associated domain	SLC22A16,LAMA4,ENSG00000226440,FYN
rs1449395	Topologically associated domain	CADM2,LINC00971,ZNF717
rs11647110	Chromatin interactive region	NFAT5
rs10994933	Topologically associated domain	ZNF365
rs2173201	circRNA region
rs35514852	circRNA region
rs11039342	circRNA region
rs1194286	Topologically associated domain	ZRANB2-AS2,NEGR1
rs2478978	circRNA region
rs10225865	circRNA region
rs4349886	circRNA region,Topologically associated domain	CARD11,SDK1
rs10742824	circRNA region
rs4953153	Topologically associated domain	CAMKMT,MSH2,PLEKHH2,NRXN1,PRKCE,SRBD1,LRPPRC
rs12773833	Topologically associated domain	SH3PXD2A,ENSG00000235470,CCDC147,NEURL1
rs6874021	circRNA region
rs17653906	circRNA region
rs62055467	Topologically associated domain	PLEKHM1
rs10786706	Topologically associated domain,Chromatin interactive region	CNNM2,CCDC147,XPNPEP1
rs9827318	Topologically associated domain	CADM2
rs60732670	circRNA region
rs4722710	circRNA region,Topologically associated domain	CARD11,SDK1
rs62055495	Topologically associated domain	PLEKHM1
rs4581739	circRNA region,TF binding region	RNU7-101P
rs2925629	circRNA region
rs11209928	Topologically associated domain	ZRANB2-AS2,NEGR1
rs6717424	circRNA region
rs34838	circRNA region
rs72930787	circRNA region,lncRNA region
rs7129237	circRNA region
rs7222444	Chromatin interactive region	ARHGAP27
rs35353359	Chromatin interactive region,TF binding region	ZSCAN31
rs6531714	Topologically associated domain	N4BP2,TLR1,APBB2,TBC1D1
rs7742724	Chromatin interactive region	TRAF3IP2-AS1
rs2494995	circRNA region,Chromatin interactive region	KDM4A
rs7122182	circRNA region,Chromatin interactive region	ENSG00000252874
rs2909448	circRNA region
rs72793812	circRNA region
rs12475426	circRNA region
rs10742178	Topologically associated domain	BDNF-AS,ENSG00000255322,PLEKHA7,NAV2,RRM1,ANO3,C11orf58,ENSG00000246225,ENSG00000254530,SOX6,TTC17,DCDC1
rs7124596	Topologically associated domain	BDNF-AS,SLC6A5,PAMR1,ANO3,C11orf58,ENSG00000246225,ENSG00000254530,SOX6,TTC17,DCDC1
rs199461	circRNA region
rs12531440	circRNA region
rs4295021	circRNA region
rs4616820	Chromatin interactive region	PAICS,PPAT
rs20370	Topologically associated domain	WDR7
rs1461586	Topologically associated domain	ENSG00000259097,SETD3
rs4738735	circRNA region
rs2732601	circRNA region
rs6598539	circRNA region
rs4555841	circRNA region
rs1969045	Chromatin interactive region	HSPA5
rs10445367	Topologically associated domain	PLEKHM1
rs216195	circRNA region,Chromatin interactive region	SMG6
rs11039216	Topologically associated domain	DGKZ
rs4722709	circRNA region,Topologically associated domain	CARD11,SDK1
rs2675637	Topologically associated domain,Chromatin interactive region	ENSG00000233643,ZNF365
rs4666000	circRNA region,Topologically associated domain	PLB1,ATAD2B
rs62036622	circRNA region
rs10838704	Topologically associated domain	DGKZ
rs73046607	circRNA region,Topologically associated domain	SDK1
rs8049439	circRNA region,Chromatin interactive region	ENSG00000261766
rs12325278	Chromatin interactive region,TF binding region	ENSG00000260570
rs6983727	circRNA region,TF binding region	ENSG00000255518
rs4335809	circRNA region
rs8077487	circRNA region,Chromatin interactive region,lncRNA region	KANSL1-AS1
rs6807173	circRNA region
rs199505	circRNA region
rs3849708	circRNA region
rs13197175	Chromatin interactive region,TF binding region	ZNF192P1
rs987514	lncRNA region
rs11030402	Topologically associated domain	BDNF-AS,ENSG00000254530
rs10838777	circRNA region
rs12360643	circRNA region
rs4841457	Topologically associated domain	XKR6
rs56016607	circRNA region
rs55942317	circRNA region
rs62055471	Topologically associated domain	PLEKHM1
rs67506723	Topologically associated domain	CCDC147,XPNPEP1
rs7108479	circRNA region
rs11750548	Topologically associated domain	ENSG00000253693,ENSG00000241956,TENM2,WWC1
rs10028756	circRNA region
rs10038897	circRNA region
rs62063165	circRNA region
rs240966	circRNA region,Chromatin interactive region	MIR3687
rs7481939	Topologically associated domain	BDNF-AS,ENSG00000254530
rs2726518	circRNA region,Topologically associated domain	ENSG00000245322,SLC39A8,TET2,TBCK
rs56036719	Topologically associated domain	PLEKHM1
rs10769299	circRNA region
rs199452	circRNA region
rs8020355	Topologically associated domain	ENSG00000259097,SETD3
rs10495910	circRNA region,Chromatin interactive region	LRPPRC
rs2080976	Topologically associated domain	ENSG00000253693,ENSG00000241956,TENM2
rs11075729	circRNA region
rs904096	circRNA region
rs8062405	circRNA region,Chromatin interactive region	ENSG00000261766
rs17336684	Topologically associated domain	SLC9A2
rs7154408	Topologically associated domain	ENSG00000259097,SETD3
rs7502280	lncRNA region
rs247911	circRNA region
rs4722723	circRNA region,Topologically associated domain	CARD11,SDK1
rs6965147	circRNA region
rs62055555	Chromatin interactive region	MAPT
rs567897	Topologically associated domain	CAMKMT,PLEKHH2
rs6879246	Topologically associated domain	ENSG00000253693,ENSG00000241956,TENM2,WWC1
rs10767733	circRNA region,Topologically associated domain	BDNF-AS,ENSG00000254530
rs12421210	circRNA region
rs8039398	circRNA region
rs1906654	Topologically associated domain	BDNF-AS,SLC6A5,PAMR1,ANO3,C11orf58,ENSG00000246225,ENSG00000254530,SOX6,TTC17,DCDC1
rs13197633	Chromatin interactive region	ZNF192P2
rs2316953	circRNA region
rs7105851	circRNA region,Topologically associated domain	CKAP5
rs199509	circRNA region
rs72930759	circRNA region
rs55968130	circRNA region
rs12798028	circRNA region
rs9840636	Topologically associated domain	EIF4E3,CADM2,ENSG00000239440
rs9357006	TF binding region	BTN3A2
rs11641216	circRNA region,Chromatin interactive region,TF binding region	ENSG00000252461
rs2588985	Topologically associated domain	ZNF365
rs3736922	circRNA region
rs62059003	lncRNA region
rs12783782	circRNA region
rs77000205	circRNA region,Chromatin interactive region	REV3L
rs3021494	lncRNA region
rs13074892	Topologically associated domain	CADM2,LINC00971
rs6743819	circRNA region
rs7161578	Topologically associated domain	ENSG00000259097,SETD3
rs12775302	circRNA region
rs1499971	Topologically associated domain	ENSG00000239268,IGSF11,LSAMP
rs199534	circRNA region
rs7907503	Topologically associated domain,Chromatin interactive region	ENSG00000272933,CCDC147,NEURL1
rs325444	circRNA region
rs74509831	Topologically associated domain	TEX41,ARHGAP15
rs77925835	circRNA region
rs7678440	circRNA region,Topologically associated domain	ENSG00000245322,SLC39A8,TET2,TBCK
rs3902020	Topologically associated domain	DCC
rs883322	Topologically associated domain	ENSG00000253693,ENSG00000241956,TENM2
rs62055517	Topologically associated domain	PLEKHM1
rs10193244	Topologically associated domain	MYT1L
rs3126227	circRNA region,Topologically associated domain	GAPVD1
rs7498603	circRNA region
rs36101351	TF binding region	OR2W4P
rs11127903	Topologically associated domain	CADM2,LINC00971,ZNF717
rs2280600	circRNA region,Topologically associated domain	DYNC1I1,ENSG00000205236,ENSG00000239521,TRRAP,GATS
rs3924376	circRNA region
rs7001367	circRNA region
rs4722655	circRNA region,Topologically associated domain,TF binding region	ENSG00000236708,SDK1
rs4556054	Topologically associated domain	SLC26A7,ENSG00000253901,ENSG00000248858
rs10883785	TF binding region	PTGES3P4
rs2248909	Topologically associated domain	BLK
rs13082138	circRNA region
rs34286926	TF binding region	ENSG00000264038
rs7648172	Topologically associated domain	CADM2
rs7225002	circRNA region
rs34379767	Topologically associated domain	BDNF,ENSG00000254530,DCDC1
rs13279311	circRNA region
rs6650723	Topologically associated domain	WDR7
rs13220495	circRNA region,TF binding region	BTN3A3
rs2303369	circRNA region,Topologically associated domain,Chromatin interactive region	GTF3C2,ATAD2B
rs11915638	circRNA region
rs34608458	circRNA region,Topologically associated domain	SDK1
rs2684641	circRNA region,Topologically associated domain	JUP,CA10,PLEKHM1
rs1868029	Topologically associated domain	LRRC4C,TTC17
rs62053839	circRNA region
rs199455	circRNA region,TF binding region	RPS7P11
rs4752865	circRNA region
rs28855509	Chromatin interactive region	C17orf58
rs62064655	circRNA region
rs4267058	Topologically associated domain	BDNF-AS,ENSG00000254530
rs62063296	circRNA region,Topologically associated domain	MAPT
rs17649918	circRNA region,lncRNA region
rs77875796	circRNA region,Topologically associated domain	MAPT
rs9818122	circRNA region
rs72793809	Chromatin interactive region,TF binding region,lncRNA region	NFATC2IP,,ATXN2L,ENSG00000261067,ENSG00000260796
rs199470	circRNA region
rs34243448	circRNA region,Chromatin interactive region,TF binding region	ZKSCAN8,HIST1H4K,ZSCAN9,ENSG00000261839,SNORD118
rs11607981	Topologically associated domain,TF binding region	SPI1,DGKZ
rs55686102	circRNA region
rs1194265	circRNA region,Topologically associated domain	ZRANB2-AS2,NEGR1
rs55947210	Chromatin interactive region	ENSG00000265547
rs1112281	circRNA region
rs13198809	Chromatin interactive region,TF binding region	HIST1H2BO,HIST1H3J,ZSCAN31,HIST1H2AM
rs472140	Topologically associated domain	CAMKMT,PLEKHH2
rs2664006	circRNA region,Topologically associated domain	MAPT
rs10835383	Topologically associated domain	BDNF-AS,ENSG00000254530
rs7829715	circRNA region
rs1783832	Topologically associated domain	ARHGEF12
rs9375283	Topologically associated domain	FAXC,ENSG00000271860
rs1043466	circRNA region,Topologically associated domain,Chromatin interactive region,miRNA target site,lncRNA region	DYNC1I1,,ENSG00000205236,ENSG00000239521,CPSF4,TRRAP,BUD31,GATS
rs9912770	circRNA region,Topologically associated domain	CEP112,LINC00511,ENSG00000267659,BPTF,FAM20A,CACNG5,LRRC37A3,HELZ,MAP2K6
rs11191596	circRNA region
rs3860761	circRNA region
rs17670430	circRNA region
rs78637438	Topologically associated domain	PLEKHM1
rs7821826	Topologically associated domain	XKR6
rs1862347	Topologically associated domain	ENSG00000253693,ENSG00000241956,TENM2
rs4665378	Chromatin interactive region,TF binding region	MPV17
rs2705600	circRNA region,Topologically associated domain	SDK1
rs1042157	circRNA region,Chromatin interactive region	CCDC101
rs9393926	Chromatin interactive region	HIST1H2BO
rs7116850	lncRNA region
rs12452823	circRNA region,Topologically associated domain	PRKCA,CEP112,ENSG00000267659,BPTF,HELZ,MAP2K6
rs10788952	circRNA region,Topologically associated domain	ZYG11B,RAB3B,TCEANC2,LRP8,USP24,YIPF1,TTC39A
rs7950696	Topologically associated domain	ATG13
rs13023094	circRNA region,Topologically associated domain	ASXL2,PLB1,ENSG00000231200,DPYSL5,BIRC6,ITSN2,ALK,KLHL29,ENSG00000233862,WDR35,DNAJC27-AS1,MAPRE3,ATAD2B
rs11191530	circRNA region
rs12089815	Topologically associated domain	HFM1
rs6720153	Topologically associated domain	SLC9A2
rs67391933	Topologically associated domain	CADM2,LINC00971,ZNF717
rs11134465	Topologically associated domain	ENSG00000253693,ENSG00000241956,TENM2,WWC1
rs780094	circRNA region
rs62064657	circRNA region
rs2002153	Chromatin interactive region	PAICS,PPAT
rs4974930	circRNA region
rs76307183	circRNA region
rs78526269	Topologically associated domain	CADM2,ENSG00000239440
rs61384494	circRNA region
rs10227320	circRNA region
rs79108591	Topologically associated domain	ENSG00000259097,SETD3
rs9841044	Topologically associated domain	CADM2,LINC00971,ZNF717
rs72930774	circRNA region,TF binding region	ENSG00000267402
rs72926932	circRNA region
rs174379	circRNA region
rs10445337	circRNA region,Topologically associated domain	MAPT
rs7016385	Topologically associated domain	XKR6
rs10445369	Topologically associated domain	PLEKHM1
rs12766205	circRNA region
rs895632	Topologically associated domain,Chromatin interactive region,lncRNA region	CAMKMT,MSH2,PLEKHH2,ARF4,NRXN1,PRKCE,SRBD1,ENSG00000272146,LRPPRC
rs35749575	circRNA region,Chromatin interactive region	HIST1H3J,HIST1H2AM
rs12361031	circRNA region
rs2241894	circRNA region
rs9866761	Topologically associated domain	CADM2,LINC00971,ZNF717
rs70600	circRNA region
rs1078269	Topologically associated domain	MAPT
rs79698033	circRNA region,Chromatin interactive region	ENSG00000262372
rs1461572	Topologically associated domain	ENSG00000259097,SETD3
rs9358932	Chromatin interactive region	HCG11
rs13085795	Topologically associated domain	CADM2,LINC00971
rs143710964	circRNA region
rs4822491	Topologically associated domain	POLR2F,CABIN1
rs63750417	Topologically associated domain,Chromatin interactive region	KANSL1-AS1,MAPT
rs4752845	circRNA region,Topologically associated domain	CELF1,TTC17
rs72934580	Topologically associated domain	WDR7
rs6946541	circRNA region
rs55991577	circRNA region
rs2325006	circRNA region
rs2841313	circRNA region
rs897888	circRNA region
rs3740699	circRNA region,Topologically associated domain,lncRNA region	ATG13
rs62060851	circRNA region,Chromatin interactive region	KANSL1-AS1
rs6781897	circRNA region,Topologically associated domain	EIF4E3
rs79039694	circRNA region,Chromatin interactive region	CCDC101
rs9385308	Topologically associated domain	ENSG00000271860
rs17571809	lncRNA region
rs817515	Topologically associated domain	IGSF11,LSAMP
rs7683416	circRNA region
rs10112089	circRNA region
rs75229280	circRNA region
rs2456245	circRNA region
rs2726521	circRNA region,Topologically associated domain	ENSG00000245322,SLC39A8,TET2,TBCK
rs8080583	circRNA region
rs6504549	circRNA region,Topologically associated domain	PRKCA,CEP112,ENSG00000267659,BPTF,HELZ,MAP2K6
rs546606867	Topologically associated domain	SHISA9,SNX29
rs145466117	circRNA region
rs190653003	Topologically associated domain	ENSG00000245322,STPG2
rs6966730	circRNA region
rs12533846	circRNA region
rs34097347	Topologically associated domain	PLEKHM1
rs1381289	Topologically associated domain	ENSG00000259097,SETD3
rs7574952	TF binding region	ENSG00000221849
rs62519848	circRNA region
rs62061849	circRNA region
rs62061817	circRNA region
rs113301527	circRNA region,Chromatin interactive region,lncRNA region	DND1P1,ENSG00000261575
rs1022298	TF binding region	ENSG00000221849
rs843854	Topologically associated domain	IGSF11,LSAMP
rs6531716	Topologically associated domain	TLR1,APBB2,TBC1D1,KIAA1239
rs12174602	circRNA region
rs10253937	Chromatin interactive region,TF binding region	ZSCAN25,ZNF655,ENSG00000272647
rs7568987	Topologically associated domain,Chromatin interactive region	CAMKMT,PLEKHH2,SIX3-AS1
rs1471065	circRNA region,Topologically associated domain	ENSG00000239268,LSAMP
rs9863150	circRNA region
rs4500960	circRNA region
rs3911063	circRNA region
rs4919691	Chromatin interactive region	AS3MT
rs11783418	Topologically associated domain	XKR6
rs1032625	circRNA region,Topologically associated domain	ENSG00000245322,SLC39A8,TET2,TBCK
rs362307	circRNA region,Chromatin interactive region	RGS12
rs2726461	circRNA region,Topologically associated domain	ENSG00000245322,SLC39A8,TET2,TBCK
rs9379854	Chromatin interactive region	HCG11
rs918793	circRNA region
rs13240600	Topologically associated domain,Chromatin interactive region,TF binding region	DYNC1I1,ATP5J2,ENSG00000205236,ATP5J2-PTCD1,PTCD1,ZSCAN25,ENSG00000239521,ZNF655,TRRAP,GATS,ENSG00000272647
rs1662051	circRNA region
rs11600581	Topologically associated domain,Chromatin interactive region,TF binding region	ARFGAP2,PSMC3,DGKZ
rs539096	circRNA region
rs7124681	circRNA region,Topologically associated domain	CELF1,TTC17
rs13236900	circRNA region
rs948594	Topologically associated domain	DCC,MBD2
rs7791617	circRNA region
rs528301	Topologically associated domain,Chromatin interactive region	CAMKMT,PLEKHH2,SIX3-AS1
rs4868053	circRNA region
rs6162	TF binding region	CYP17A1
rs6764277	Topologically associated domain	CADM2,LINC00971
rs7244737	lncRNA region
rs4149392	circRNA region,Chromatin interactive region	CCDC101
rs9358930	Chromatin interactive region	MIR3143,HIST1H2AH
rs72930740	circRNA region,TF binding region	MIR4529
rs7189927	circRNA region,Chromatin interactive region	SH2B1
rs6711344	Topologically associated domain	SLC9A2
rs6727215	Topologically associated domain	PLB1
rs10037007	circRNA region
rs12195240	Topologically associated domain	ENSG00000271860
rs8079078	Chromatin interactive region,TF binding region	ZBTB21,BPTF,NOL11,LRIG2,POLR2C,ENSG00000238198
rs12803525	Topologically associated domain,lncRNA region	DGKZ
rs7116970	circRNA region
rs4147542	circRNA region
rs6997997	Topologically associated domain	XKR6
rs55958116	circRNA region
rs7130649	Topologically associated domain	BDNF-AS,ENSG00000254530
rs7085104	TF binding region	RNU6-372P,AS3MT
rs12478841	circRNA region,Topologically associated domain	PLB1,ATAD2B
rs11039379	circRNA region,Chromatin interactive region	ENSG00000271557
rs55943606	Chromatin interactive region	MAPT
rs939912	circRNA region
rs539447	Topologically associated domain	CAMKMT,PLEKHH2
rs12150344	circRNA region
rs13082188	Topologically associated domain	CADM2,LINC00971,ZNF717
rs11030382	circRNA region,Topologically associated domain	BDNF-AS,ENSG00000254530
rs930891	circRNA region
rs6547692	circRNA region
rs10445334	Topologically associated domain	PLEKHM1
rs34803122	circRNA region
rs10475856	Topologically associated domain	ENSG00000253693,ENSG00000241956,TENM2,WWC1
rs162061	Topologically associated domain	ENSG00000251574
rs12995983	circRNA region
rs11206127	Topologically associated domain	EPS15,RAB3B,USP24
rs199533	circRNA region
rs1202225	circRNA region
rs56220387	circRNA region,Chromatin interactive region	ENSG00000267344,ENSG00000233483
rs6967278	circRNA region,Topologically associated domain	CARD11,SDK1
rs62063292	circRNA region,Topologically associated domain	MAPT
rs1451975	Topologically associated domain	SLC9A2
rs1563821	circRNA region
rs4665977	Topologically associated domain	ASXL2,PLB1,WDR43,ATAD2B
rs7928419	circRNA region,Topologically associated domain	CKAP5
rs55692232	circRNA region
rs71559072	Chromatin interactive region	HIST1H3J,ZSCAN16,HIST1H2AM
rs6484379	Topologically associated domain	BDNF-AS,ENSG00000254530
rs111913701	circRNA region,Chromatin interactive region	KANSL1-AS1
rs9379851	TF binding region	RNU6-1259P
rs4923460	TF binding region	LINC00678
rs72934570	Topologically associated domain	WDR7
rs28591300	circRNA region
rs62055470	Topologically associated domain	PLEKHM1
rs13105581	circRNA region,Topologically associated domain	ENSG00000245322,SLC39A8,CENPE,BANK1
rs10786741	circRNA region
rs4856463	Topologically associated domain	CADM2,ENSG00000239440
rs6504570	Topologically associated domain	ENSG00000267009,MAP3K3,HELZ,MAP2K6
rs1919127	Topologically associated domain	PLB1,ATAD2B
rs33932084	circRNA region
rs10146627	Topologically associated domain	ENSG00000259097,SETD3
rs149366495	circRNA region,Topologically associated domain,TF binding region	JUP,CA10,PLEKHM1,RN7SL730P
rs6601427	circRNA region
rs56074153	circRNA region,Topologically associated domain	SDK1
rs6224	circRNA region,Chromatin interactive region	ENSG00000200677
rs4565311	circRNA region,Topologically associated domain	ENSG00000271860
rs7783012	circRNA region
rs113954968	circRNA region,Topologically associated domain	ATAD2B
rs35565446	Chromatin interactive region	HIST1H2BO,MIR3143,HIST1H2BK,HIST1H2AH
rs6543218	Topologically associated domain	SLC9A2
rs2424246	circRNA region,Topologically associated domain,Chromatin interactive region	ENSG00000239120,SLC24A3,C20orf26
rs13197176	Chromatin interactive region,TF binding region	ZNF192P1
rs10224159	circRNA region
rs2696541	circRNA region,Chromatin interactive region	ENSG00000261575
rs4564102	circRNA region
rs192822960	Chromatin interactive region	ENSG00000263923
rs1526125	TF binding region	ENSG00000265547,ENSG00000265964
rs4953149	Topologically associated domain,lncRNA region	CAMKMT,PLEKHH2
rs2044723	Topologically associated domain	CADM2,LINC00971,ZNF717
rs6543220	Topologically associated domain	SLC9A2
rs17773233	Topologically associated domain	ENSG00000259097,SETD3
rs11719183	Topologically associated domain	CADM2,LINC00971
rs7686103	Topologically associated domain	TLR1,APBB2,TBC1D1,KIAA1239
rs13113094	circRNA region
rs66652022	circRNA region
rs4383188	circRNA region,Chromatin interactive region	KANSL1-AS1
rs62055540	Chromatin interactive region	MAPT
rs56257094	circRNA region
rs6920014	circRNA region,lncRNA region
rs4731381	circRNA region
rs8039305	circRNA region
rs7904113	circRNA region
rs78720789	TF binding region,lncRNA region	MAPT-AS1
rs11642546	circRNA region,Chromatin interactive region	RHBDL1,ENSG00000197727,FAM195A,STUB1
rs7498555	circRNA region,Chromatin interactive region,TF binding region	ENSG00000252461
rs62060794	circRNA region
rs66779961	circRNA region
rs864199	Topologically associated domain	IGSF11,LSAMP
rs9401724	Topologically associated domain	ENSG00000271860
rs7216064	circRNA region,Topologically associated domain,Chromatin interactive region	PRKCA,CEP112,ENSG00000267659,BPTF,HELZ,MAP2K6
rs2582044	circRNA region
rs62084683	Topologically associated domain,Chromatin interactive region,TF binding region	ENSG00000267009,MAP3K3,ENSG00000265055,HELZ,PI4KB,KPNA2,ENSG00000273481,MAP2K6,FAM83E
rs4451951	circRNA region,Chromatin interactive region	NFATC2IP,,RABEP2
rs4923461	TF binding region	LINC00678
rs2336895	Topologically associated domain	ENSG00000253693,ENSG00000241956,TENM2
rs4916908	lncRNA region
rs74078245	Topologically associated domain	ENSG00000259097,SETD3
rs62084213	circRNA region,Topologically associated domain	CEP112,LINC00511,ENSG00000267659,BPTF,FAM20A,CACNG5,LRRC37A3,HELZ,MAP2K6
rs11030393	Topologically associated domain	BDNF-AS,ENSG00000254530
rs62054831	Topologically associated domain	PLEKHM1
rs199525	circRNA region
rs11605774	circRNA region
rs2075965	circRNA region,Chromatin interactive region	REV3L
rs570436	Topologically associated domain	CAMKMT,PLEKHH2
rs11191586	circRNA region
rs62065385	circRNA region,Topologically associated domain	JUP,CA10,PLEKHM1
rs1915981	circRNA region
rs1898110	circRNA region
rs12606638	Topologically associated domain	ENSG00000206129,WDR7,ENSG00000267057
rs1373130	lncRNA region
rs11684134	circRNA region,Chromatin interactive region,TF binding region	ENSG00000234945,ENSG00000234072,GTF3C2,EIF2B4
rs1011024	circRNA region
rs7513015	circRNA region,TF binding region	MIR3605
rs3781282	circRNA region
rs11885577	Topologically associated domain	SLC9A2
rs62263912	Topologically associated domain	CADM2,LINC00971,ZNF717
rs1549212	Topologically associated domain	ENSG00000253693,ENSG00000241956,TENM2
rs62061795	circRNA region
rs12798346	circRNA region
rs284860	circRNA region
rs9650210	TF binding region	ENSG00000254102
rs2454206	circRNA region,Topologically associated domain,miRNA target site	ENSG00000245322,SLC39A8,TET2,TBCK
rs199528	circRNA region,Chromatin interactive region	GOSR2,ENSG00000262633
rs11914525	circRNA region
rs3740387	circRNA region
rs10734394	Topologically associated domain	BDNF-AS,ENSG00000255322,PLEKHA7,NAV2,RRM1,ANO3,C11orf58,ENSG00000246225,ENSG00000254530,SOX6,TTC17,DCDC1
rs199530	circRNA region
rs75231441	circRNA region,Topologically associated domain	PRKCA,CEP112,ENSG00000267659,BPTF,HELZ,MAP2K6
rs11811978	circRNA region,Topologically associated domain	ZYG11B,RAB3B,TCEANC2,LRP8,USP24,YIPF1,TTC39A
rs278016	Topologically associated domain	ENSG00000253693,ENSG00000241956,TENM2,WWC1
rs34765154	Chromatin interactive region,TF binding region	ZNF192P1,ZSCAN9
rs2838	circRNA region
rs77924366	circRNA region
rs12415468	circRNA region
rs240983	circRNA region
rs2071305	Topologically associated domain,Chromatin interactive region	MADD,CKAP5
rs12802244	Topologically associated domain	CKAP5
rs111693583	Chromatin interactive region	CCDC101
rs903801	Topologically associated domain	LAMA2,ADGB,SYNE1,PLEKHG1,CCDC170
rs732711	Topologically associated domain	ENSG00000253693,ENSG00000241956,TENM2,WWC1
rs62062136	circRNA region,Chromatin interactive region	KANSL1-AS1
rs4791300	circRNA region,Topologically associated domain,Chromatin interactive region	PRKCA,CEP112,ENSG00000267659,BPTF,FAM20A,FOXK2,HELZ,SMURF2,C17orf58,MAP2K6
rs619466	circRNA region
rs888976	Topologically associated domain	ENSG00000253693,ENSG00000241956,TENM2
rs2043982	circRNA region
rs7935241	Topologically associated domain	BDNF-AS,ENSG00000254530
rs241001	Topologically associated domain,TF binding region	SLC22A16,LAMA4,ENSG00000226440,ENSG00000231046,FYN,KIAA1919
rs35243068	Chromatin interactive region	HIST1H2BO
rs4788095	Chromatin interactive region	ENSG00000261067
rs11577403	Chromatin interactive region	ENSG00000234694
rs62084697	circRNA region,Topologically associated domain	ENSG00000267009,MAP3K3,HELZ,MAP2K6
rs60833259	circRNA region,Chromatin interactive region	FNBP4
rs174380	circRNA region
rs12044012	circRNA region,Chromatin interactive region,TF binding region	ENSG00000256142,PHC2,ENSG00000233246
rs11039203	circRNA region,Topologically associated domain	CKAP5
rs29001570	circRNA region,Topologically associated domain	ENSG00000245322,SLC39A8,STPG2,MTTP
rs6504576	circRNA region,Topologically associated domain	ENSG00000267009,MAP3K3,HELZ,MAP2K6
rs16917237	Topologically associated domain	BDNF,ENSG00000254530,DCDC1
rs242928	Topologically associated domain	PLEKHM1
rs71557378	circRNA region
rs62263112	circRNA region,Topologically associated domain	ENSG00000239268,LSAMP
rs11864107	Chromatin interactive region	RABEP2
rs10838724	circRNA region,Topologically associated domain	CELF1,TTC17
rs55686445	Topologically associated domain	CADM2,LINC00971,ZNF717
rs62084693	circRNA region,Topologically associated domain	ENSG00000267009,MAP3K3,HELZ,MAP2K6
rs79772780	circRNA region
rs7920697	circRNA region
rs12225854	circRNA region
rs12449442	circRNA region,Topologically associated domain,lncRNA region	PRKCA,CEP112,,ENSG00000267659,BPTF,FAM20A,FOXK2,HELZ,SMURF2,MAP2K6
rs2140114	circRNA region
rs4803	circRNA region,Topologically associated domain,Chromatin interactive region	ASXL2,PLB1,SNX17,WDR43,ATAD2B
rs17573245	circRNA region,Topologically associated domain	MAPT
rs28712821	Topologically associated domain	TLR1,APBB2,TBC1D1,KIAA1239
rs11708023	Topologically associated domain	CADM2,ENSG00000239440
rs7752159	circRNA region
rs9828285	Topologically associated domain	LSAMP,ENSG00000243276
rs12416687	TF binding region	RNU6-372P,AS3MT
rs12416483	circRNA region
rs113347741	TF binding region,lncRNA region	MAPT-AS1
rs185819	circRNA region,Topologically associated domain	TNXB
rs17572613	Topologically associated domain	MAPT
rs12602655	circRNA region,Topologically associated domain	PRKCA,CEP112,ENSG00000267659,BPTF,HELZ,MAP2K6
rs62036624	circRNA region
rs77095128	circRNA region,TF binding region	RNU7-101P
rs79447161	circRNA region,Topologically associated domain	MAPT
rs13078807	circRNA region
rs573350	circRNA region
rs12494658	circRNA region
rs17410535	Topologically associated domain	TEX41,ARHGAP15
rs72928910	circRNA region
rs10838758	circRNA region
rs67297533	Chromatin interactive region	ENSG00000216901
rs55643511	circRNA region,Topologically associated domain	JUP,CA10,PLEKHM1
rs111724389	circRNA region,Chromatin interactive region	RNU7-101P
rs13200214	Chromatin interactive region	HIST1H2BO
rs9388294	Topologically associated domain	FAXC,ENSG00000271860
rs10174328	Topologically associated domain	SLC9A2
rs3816605	circRNA region
rs7909022	circRNA region
rs739642	Topologically associated domain	PLEKHM1
rs11691432	Topologically associated domain	ASXL2,PLB1,WDR43,ATAD2B
rs7912517	circRNA region
rs62060787	circRNA region
rs430685	circRNA region
rs10078164	circRNA region
rs2297660	circRNA region,Topologically associated domain,TF binding region	ZYG11B,RAB3B,ENSG00000234578,TCEANC2,LRP8,USP24,YIPF1,TTC39A
rs332817	circRNA region
rs34465449	Chromatin interactive region,TF binding region	ARHGAP27
rs10509766	circRNA region
rs62474683	Topologically associated domain	TFEC
rs7204433	Chromatin interactive region	NFAT5
rs62036618	lncRNA region
rs7193733	Chromatin interactive region,TF binding region	NFATC2IP,MIR4517,HIST1H2BD,SH2B1,ENSG00000261766
rs12257472	circRNA region
rs12466127	circRNA region
rs530916	Topologically associated domain	ARHGEF12
rs114647162	circRNA region,TF binding region	ENSG00000267028
rs393675	lncRNA region
rs2732651	circRNA region,TF binding region	ENSG00000261575
rs62261676	Topologically associated domain	EIF4E3,CADM2,ENSG00000239440
rs59369558	Topologically associated domain	TFEC
rs1980307	Topologically associated domain	DYNC1I1,ENSG00000205236,ENSG00000239521,TRRAP,GATS
rs1448610	Topologically associated domain	CADM2,ENSG00000239440
rs4722693	circRNA region,Topologically associated domain	CARD11,SDK1
rs3808097	circRNA region
rs4790874	circRNA region
rs17572361	circRNA region,Topologically associated domain	MAPT
rs17336349	TF binding region	ENSG00000236596
rs10511073	Topologically associated domain	CADM2,LINC00971,ZNF717
rs174402	circRNA region,Topologically associated domain	ENSG00000226440
rs667676	circRNA region
rs1926036	circRNA region,Chromatin interactive region	ENSG00000237827
rs1563304	circRNA region,Chromatin interactive region	WNT3
rs2242081	circRNA region,Topologically associated domain	ATG13
rs6466488	circRNA region
rs62086907	Topologically associated domain	ENSG00000267009,MAP3K3,HELZ,MAP2K6
rs1004787	Topologically associated domain,lncRNA region	CAMKMT,PLEKHH2
rs62055468	Topologically associated domain	PLEKHM1
rs9633830	circRNA region
rs9309994	circRNA region
rs12451511	circRNA region,Topologically associated domain	CEP112,LINC00511,ENSG00000267659,BPTF,FAM20A,CACNG5,LRRC37A3,HELZ,MAP2K6
rs7604640	Topologically associated domain	CAMKMT,PLEKHH2
rs11191572	circRNA region
rs17660847	circRNA region
rs55909047	circRNA region
rs2056476	circRNA region
rs6485775	circRNA region,Chromatin interactive region	FNBP4
rs13159986	Topologically associated domain	ENSG00000253693,ENSG00000241956,TENM2,WWC1
rs17649138	Chromatin interactive region	ENSG00000265547
rs17577954	circRNA region,Chromatin interactive region	RNU7-101P
rs1386549	circRNA region,Topologically associated domain	FAXC,ENSG00000271860
rs7834121	Topologically associated domain	XKR6
rs2841332	Chromatin interactive region	HSPA5
rs55711239	Topologically associated domain	ENSG00000271860
rs6537444	Topologically associated domain	OTUD4,PRMT10,ENSG00000250195,ARHGAP10
rs1449398	Topologically associated domain	CADM2,LINC00971,ZNF717
rs6760250	circRNA region,Topologically associated domain	PLB1,ATAD2B
rs9401757	circRNA region
rs12192372	Topologically associated domain	FAXC,ENSG00000271860
rs2161630	circRNA region,Chromatin interactive region	MIR1538
rs7728883	circRNA region
rs1900916	Topologically associated domain	CADM2,LINC00971,ZNF717
rs7129601	circRNA region,Topologically associated domain	BDNF-AS,ENSG00000254530
rs9371534	Topologically associated domain	LAMA2,ADGB,SYNE1,PLEKHG1,CCDC170
rs7917547	circRNA region,Chromatin interactive region	CNNM2,
rs2898290	lncRNA region
rs62060762	circRNA region
rs10767649	Topologically associated domain	BDNF-AS,ENSG00000255322,PLEKHA7,NAV2,RRM1,ANO3,C11orf58,ENSG00000246225,ENSG00000254530,SOX6,TTC17,DCDC1
rs12150551	circRNA region
rs1487449	circRNA region
rs828103	Chromatin interactive region	HSPA5,ENSG00000239705
rs6504568	Chromatin interactive region	C17orf58
rs8055756	circRNA region
rs888974	Topologically associated domain	ENSG00000253693,ENSG00000241956,TENM2
rs283413	circRNA region
rs7570198	Topologically associated domain	MYT1L
rs6471756	circRNA region
rs3861984	circRNA region,Chromatin interactive region	RPEL1,NT5C2
rs12150090	circRNA region,Chromatin interactive region,lncRNA region	KANSL1-AS1
rs71557334	Chromatin interactive region,TF binding region	ENSG00000215979,BTN3A2
rs444071	lncRNA region
rs35902101	circRNA region
rs8082512	circRNA region
rs62263116	circRNA region,Topologically associated domain	ENSG00000239268,LSAMP
rs62060786	circRNA region
rs9393706	Chromatin interactive region	HCG11
rs4869062	Topologically associated domain	ENSG00000253693,ENSG00000241956,TENM2,WWC1
rs4385365	circRNA region,Topologically associated domain	CARD11,SDK1
rs4722695	circRNA region,Topologically associated domain	CARD11,SDK1
rs34502053	circRNA region,Topologically associated domain,Chromatin interactive region	ASXL2,PLB1,ENSG00000233862,DPYSL5,SUPT7L,WDR43,ATAD2B
rs7077097	circRNA region
rs919462	circRNA region,Topologically associated domain	MAPT
rs188895182	Topologically associated domain,lncRNA region	ENSG00000245322,STPG2
rs4856600	Topologically associated domain	CADM2,LINC00971,ZNF717
rs563433692	circRNA region
rs62036621	Chromatin interactive region,TF binding region,lncRNA region	NFATC2IP,,ATXN2L,ENSG00000260796
rs9320990	circRNA region,Topologically associated domain	ENSG00000271860
rs34613987	circRNA region
rs10252736	circRNA region
rs11209933	Topologically associated domain	ZRANB2-AS2,NEGR1
rs17572248	circRNA region,Topologically associated domain	MAPT
rs35001169	Chromatin interactive region	TOB2P1,HIST1H3J,SCAND3,HIST1H2AM
rs143092959	circRNA region
rs76627340	Topologically associated domain	PLEKHM1
rs62310292	circRNA region
rs4722712	circRNA region,Topologically associated domain	CARD11,SDK1
rs12465553	Topologically associated domain	SLC9A2
rs2950835	lncRNA region
rs62055516	Topologically associated domain	PLEKHM1
rs8070942	circRNA region,Chromatin interactive region	RNU7-101P
rs7221390	circRNA region,Chromatin interactive region	KANSL1-AS1
rs13382396	Topologically associated domain	SLC9A2
rs4636654	circRNA region,Topologically associated domain	BDNF-AS,ENSG00000254530
rs62054819	Topologically associated domain	PLEKHM1
rs10511068	circRNA region
rs62060812	circRNA region
rs67340775	Chromatin interactive region	HIST1H4K,ZSCAN31,MIR22HG,HIST1H2AH,ENSG00000255100,CBLL1,WDR81,ZKSCAN4
rs10769262	Topologically associated domain,Chromatin interactive region	ENSG00000265910,DGKZ
rs2340848	circRNA region
rs11916858	Topologically associated domain,Chromatin interactive region	ENSG00000243347,ZIC1
rs1456193	circRNA region,Topologically associated domain	ENSG00000239268,LSAMP
rs4719944	circRNA region
rs1647285	Topologically associated domain,Chromatin interactive region	GTF3C2,ATAD2B
rs2404324	circRNA region
rs2686852	circRNA region
rs112074397	circRNA region
rs9813436	Topologically associated domain	EIF4E3,CADM2,ENSG00000239440
rs4752838	Topologically associated domain	DGKZ
rs7635835	Topologically associated domain	CADM2
rs10835373	circRNA region,Topologically associated domain	BDNF-AS,ENSG00000254530
rs7942074	circRNA region
rs780100	circRNA region,Topologically associated domain,Chromatin interactive region	ASXL2,PLB1,ENSG00000235267,SUPT7L,WDR43,ZNF513,ATAD2B
rs4790973	circRNA region,Topologically associated domain	PRKCA,CEP112,ENSG00000267659,BPTF,FAM20A,FOXK2,HELZ,SMURF2,MAP2K6
rs148915469	Topologically associated domain	ENSG00000245322,STPG2
rs62055469	Topologically associated domain	PLEKHM1
rs10214442	circRNA region
rs9257223	lncRNA region
rs7784336	circRNA region,Topologically associated domain	SDK1
rs7114813	circRNA region
rs17574604	circRNA region,Chromatin interactive region,TF binding region	ENSG00000262372
rs56404791	circRNA region,Topologically associated domain	PRKCA,CEP112,ENSG00000267659,BPTF,HELZ,MAP2K6
rs2288155	Topologically associated domain,Chromatin interactive region	GTF3C2,ATAD2B
rs4788102	Chromatin interactive region	NFATC2IP
rs184626578	Topologically associated domain,lncRNA region	ENSG00000245322,STPG2
rs62263917	Topologically associated domain	CADM2,LINC00971,ZNF717
rs9358935	circRNA region,lncRNA region
rs34546986	circRNA region
rs9372300	circRNA region
rs7205323	Chromatin interactive region	SH2B1
rs1194270	Topologically associated domain	ZRANB2-AS2,NEGR1
rs9852407	Topologically associated domain	ENSG00000243347,ZIC1
rs4854348	Topologically associated domain	MYT1L
rs162057	Topologically associated domain	ENSG00000251574
rs199444	circRNA region
rs11039431	TF binding region	NUP160
rs8027450	circRNA region,Chromatin interactive region	ENSG00000226308
rs6485753	Topologically associated domain,Chromatin interactive region	ENSG00000265910,DGKZ
rs11039345	circRNA region
rs12474587	circRNA region,Chromatin interactive region	ENSG00000226946
rs56310214	circRNA region
rs1915984	circRNA region
rs1487441	circRNA region,Topologically associated domain	FAXC,ENSG00000271860
rs12463617	Chromatin interactive region	LINC00910
rs3874943	circRNA region
rs4302734	circRNA region
rs33988198	circRNA region
rs11127907	circRNA region
rs2647248	circRNA region,Topologically associated domain	ENSG00000245322,SLC39A8,TET2,TBCK
rs6106117	circRNA region,Topologically associated domain,Chromatin interactive region	ENSG00000268628,SLC24A3,C20orf26
rs4790870	circRNA region
rs1487447	Topologically associated domain	ENSG00000271860
rs4233647	circRNA region
rs56249080	Topologically associated domain	PLEKHM1
rs62037363	Chromatin interactive region	SH2B1
rs8077219	Chromatin interactive region	ENSG00000266176,KPNA2
rs2007403	circRNA region
rs2279829	Topologically associated domain	ENSG00000243347
rs11030104	Topologically associated domain	BDNF,ENSG00000254530,DCDC1
rs17177078	circRNA region
rs11191589	circRNA region
rs11747772	Topologically associated domain	ENSG00000253693,ENSG00000241956,TENM2
rs62055490	Topologically associated domain	PLEKHM1
rs66717971	circRNA region,Topologically associated domain	SMPD3,ENSG00000260537
rs1545372	Topologically associated domain	LRRC4C,TTC17
rs62055492	Topologically associated domain	PLEKHM1
rs12247514	circRNA region
rs12780116	circRNA region
rs720452	Topologically associated domain	LSAMP,ENSG00000243276
rs17563986	lncRNA region
rs1122381	circRNA region
rs11735256	circRNA region
rs12233688	Topologically associated domain	TLR1,APBB2,TBC1D1,KIAA1239
rs2668632	circRNA region
rs11580074	circRNA region
rs11738133	Topologically associated domain	ENSG00000253693,ENSG00000241956,TENM2,WWC1
rs4676964	circRNA region,Topologically associated domain	EIF4E3
rs35154693	circRNA region,Topologically associated domain	SDK1
rs35558344	lncRNA region
rs10228046	circRNA region
rs513228	circRNA region
rs10281401	circRNA region
rs294381	Chromatin interactive region,TF binding region	MPPED2
rs12054328	Topologically associated domain	CADM2,LINC00971,ZNF717
rs3740400	TF binding region	AS3MT
rs11643007	circRNA region
rs35426132	circRNA region
rs71559054	Topologically associated domain	GABBR1
rs62037369	circRNA region,Chromatin interactive region	TUFM,
rs4917997	circRNA region
rs66604259	circRNA region,Topologically associated domain	CARD11,SDK1
rs11860513	Chromatin interactive region,TF binding region,lncRNA region	ATXN2L,ENSG00000260796,ENSG00000240634
rs1372679	lncRNA region
rs7612213	Topologically associated domain	CADM2,ENSG00000239440
rs4870037	Topologically associated domain	LAMA2,ADGB,SYNE1,PLEKHG1,CCDC170
rs7209501	Chromatin interactive region	RNU5F-1
rs1229978	circRNA region
rs62063172	circRNA region,TF binding region	RNU7-101P
rs35785661	circRNA region,Topologically associated domain	CARD11,SDK1
rs919464	circRNA region,Topologically associated domain,lncRNA region	MAPT
rs4473564	circRNA region
rs2842194	circRNA region
rs7807065	circRNA region
rs62065448	TF binding region	PLEKHM1
rs17564619	lncRNA region
rs62056785	lncRNA region
rs199501	circRNA region
rs2080974	Topologically associated domain	ENSG00000253693,ENSG00000241956,TENM2
rs13405307	Topologically associated domain	MYT1L
rs17087358	circRNA region,Topologically associated domain	POLR2B
rs7752418	circRNA region
rs55674530	circRNA region
rs35389313	lncRNA region
rs11787346	Topologically associated domain	SLC26A7,ENSG00000253901,ENSG00000248858
rs199513	circRNA region
rs2572430	Topologically associated domain	ENPP7P6
rs71557332	Chromatin interactive region	MIR3143,HIST1H2AH
rs55979908	Topologically associated domain	ENSG00000239268,LSAMP
rs60075622	Topologically associated domain,Chromatin interactive region,TF binding region	ARFGAP2,PSMC3,DGKZ
rs9831610	Topologically associated domain	CADM2,LINC00971,ZNF717
rs62310298	circRNA region,Topologically associated domain,Chromatin interactive region	NOA1,POLR2B
rs7119404	circRNA region,Topologically associated domain	BDNF-AS,ENSG00000254530
rs4702	circRNA region,Chromatin interactive region,TF binding region,lncRNA region	FES
rs11039376	circRNA region,Chromatin interactive region,TF binding region	E2F3,NUP160,MIR611,SCML1,ENSG00000197727,PRRC2C,FAM195A,TMEM258,HIST2H2AB,ENSG00000268120,FEN1,ATP5J,MSH3,CHKB-CPT1B,TAOK3,ENSG00000256746,FADS2,ENSG00000257698,CHKB-AS1,DHFR,HIST2H2BE,FNBP4,RNU1-59P,TMEM161B-AS1,BOLA1
rs11863370	circRNA region,Chromatin interactive region	SH2B1
rs10780649	circRNA region
rs12450907	circRNA region,Topologically associated domain	CEP112,LINC00511,ENSG00000267659,BPTF,FAM20A,CACNG5,LRRC37A3,HELZ,MAP2K6
rs2902661	Chromatin interactive region	ENSG00000267882
rs6119904	lncRNA region
rs1977	circRNA region,Chromatin interactive region	BTN2A2
rs490340	Topologically associated domain	CAMKMT,PLEKHH2
rs3104549	circRNA region,Topologically associated domain	GAPVD1
rs62060767	circRNA region
rs35326689	Topologically associated domain	CADM2,LINC00971,ZNF717
rs6462071	circRNA region
rs12150611	circRNA region
rs11926524	circRNA region
rs2402866	circRNA region
rs11976841	circRNA region
rs10277545	circRNA region
rs10835389	Topologically associated domain	BDNF-AS,ENSG00000254530
rs8078543	circRNA region,Topologically associated domain	ENSG00000267009,MAP3K3,HELZ,MAP2K6
rs2055794	Topologically associated domain	PLEKHM1
rs2052187	circRNA region
rs41374248	circRNA region
rs79180862	circRNA region
rs62060763	circRNA region
rs1376503	Topologically associated domain	ENSG00000271860
rs2754523	circRNA region,Topologically associated domain	DPY30,ENSG00000233862,BIRC6,PSME4,MEMO1
rs16884402	circRNA region
rs113029997	Chromatin interactive region	ATXN2L,ENSG00000260796
rs883323	Topologically associated domain	ENSG00000253693,ENSG00000241956,TENM2
rs1647265	circRNA region,Topologically associated domain	ATAD2B
rs1117253	circRNA region
rs1499475	circRNA region
rs199442	circRNA region
rs35345226	Chromatin interactive region,TF binding region	HIST1H3J,ZSCAN16,HIST1H2AM
rs332827	circRNA region
rs9828595	circRNA region
rs1378358	circRNA region
rs12451707	circRNA region,Topologically associated domain	CEP112,LINC00511,ENSG00000267659,BPTF,FAM20A,CACNG5,LRRC37A3,HELZ,MAP2K6
rs34316881	Chromatin interactive region	ENSG00000260651
rs7546246	circRNA region,Topologically associated domain	ZYG11B,RAB3B,TCEANC2,LRP8,USP24,YIPF1,TTC39A
rs77513497	circRNA region,Topologically associated domain	MAPT
rs72926963	circRNA region
rs4788068	circRNA region,Chromatin interactive region	CCDC101
rs62055525	Topologically associated domain	PLEKHM1
rs62055462	Topologically associated domain	PLEKHM1
rs2017448	circRNA region
rs2960000	circRNA region,Topologically associated domain	JUP,CA10,PLEKHM1
rs4788099	circRNA region,Chromatin interactive region,TF binding region	TUFM,,MIR4721
rs62084208	circRNA region
rs8055138	Chromatin interactive region,TF binding region	ENSG00000260442,CD19,SH2B1
rs4653095	circRNA region,Chromatin interactive region,lncRNA region	ENSG00000233246
rs7794534	circRNA region
rs11869819	circRNA region,Topologically associated domain	CEP112,LINC00511,ENSG00000267659,BPTF,FAM20A,CACNG5,LRRC37A3,HELZ,MAP2K6
rs3848278	circRNA region
rs113638513	circRNA region,TF binding region	RNU7-101P
rs7221651	circRNA region
rs151182	circRNA region
rs4341787	circRNA region
rs17651857	circRNA region,Topologically associated domain,Chromatin interactive region	STH,MAPT
rs74541577	circRNA region,Topologically associated domain	CEP112,LINC00511,ENSG00000267659,BPTF,FAM20A,CACNG5,LRRC37A3,HELZ,MAP2K6
rs73168388	circRNA region
rs499257	circRNA region
rs1271144	circRNA region,Chromatin interactive region	SNX17
rs1728922	Topologically associated domain	ASXL2,PLB1,WDR43,ATAD2B
rs62063859	Topologically associated domain	MAPT
rs62519833	Chromatin interactive region,lncRNA region	ENSG00000254081
rs2203712	circRNA region,Topologically associated domain	CELF1,TTC17
rs11191381	circRNA region,Topologically associated domain	CCDC147,XPNPEP1
rs1993612	Topologically associated domain	ENSG00000253693,ENSG00000241956,TENM2,WWC1
rs76640332	circRNA region
rs4339274	Chromatin interactive region	PAICS,PPAT
rs112893440	circRNA region
rs17651754	circRNA region,Topologically associated domain	MAPT
rs7567710	Topologically associated domain	MYT1L
rs2532363	circRNA region
rs162056	Topologically associated domain	ENSG00000251574
rs3087534	circRNA region,Chromatin interactive region	KANSL1-AS1
rs62063683	circRNA region
rs13412197	Topologically associated domain	MYT1L
rs6799195	Topologically associated domain	CADM2,LINC00971,ZNF717
rs3130845	Chromatin interactive region	TRIM27
rs74697736	Topologically associated domain	ARHGAP15
rs62061847	circRNA region
rs4841106	circRNA region,TF binding region	ENSG00000248538
rs62055494	Topologically associated domain	PLEKHM1
rs34550936	Chromatin interactive region	HCG11
rs113856644	Topologically associated domain	PLEKHM1
rs4923555	Topologically associated domain	BDNF-AS,ENSG00000254530
rs3808106	circRNA region
rs603542	circRNA region
rs34872586	circRNA region,Topologically associated domain	CEP112,LINC00511,ENSG00000267659,BPTF,FAM20A,CACNG5,LRRC37A3,HELZ,MAP2K6
rs4503327	circRNA region
rs62054815	Topologically associated domain	PLEKHM1
rs17763089	Topologically associated domain,Chromatin interactive region,TF binding region	HIST1H2AB,HIST1H2BC,HIST1H1E,HIST1H1B,RNU5E-1,HIST1H3C,ENSG00000261135,C9orf41,DNAH8,RNU1-1
rs62061793	circRNA region
rs3781280	circRNA region
rs6485778	circRNA region
rs240968	circRNA region
rs12452273	circRNA region,Topologically associated domain	JUP,CA10,PLEKHM1
rs112385572	circRNA region,Topologically associated domain	MAPT
rs6584540	circRNA region
rs17778581	Topologically associated domain	PRSS51,BLK,SOX7,ENSG00000258724,PINX1
rs9907738	circRNA region
rs35496532	Topologically associated domain	DGKZ
rs3129112	Topologically associated domain	GABBR1
rs3734542	circRNA region
rs11864769	circRNA region
rs56323304	Topologically associated domain	PLEKHM1
rs77981680	circRNA region
rs325442	circRNA region
rs12408900	circRNA region,Topologically associated domain	EPS15,RAB3B,USP24
rs4571639	circRNA region
rs143722705	Topologically associated domain	ENSG00000245322,STPG2
rs284855	circRNA region
rs56329743	Topologically associated domain	PLEKHM1
rs7075552	circRNA region,lncRNA region
rs45488899	circRNA region,Chromatin interactive region	NOB1
rs7640660	lncRNA region
rs325447	circRNA region
rs943036	circRNA region
rs4870035	Topologically associated domain	LAMA2,ADGB,SYNE1,PLEKHG1,CCDC170
rs9313385	Topologically associated domain	ENSG00000253693,ENSG00000241956,TENM2,WWC1
rs6911443	circRNA region
rs2316770	Topologically associated domain	PLEKHM1
rs58382609	circRNA region
rs11208775	circRNA region
rs76380490	circRNA region,TF binding region	RNU7-101P
rs62055498	Topologically associated domain	PLEKHM1
rs10238520	circRNA region,Topologically associated domain,Chromatin interactive region,TF binding region	ENSG00000236708,SDK1
rs2222868	circRNA region
rs10147371	Topologically associated domain	ENSG00000259097,SETD3
rs1546743	circRNA region
rs1449399	Topologically associated domain	CADM2,LINC00971,ZNF717
rs2298753	circRNA region
rs7226002	Topologically associated domain,Chromatin interactive region,TF binding region	ENSG00000267009,MAP3K3,ENSG00000265055,HELZ,KPNA2,MAP2K6
rs4752860	circRNA region
rs7189878	circRNA region
rs74850776	circRNA region
rs62061790	circRNA region
rs10748835	Chromatin interactive region	ENSG00000272933,TRIM8
rs2726458	circRNA region,Topologically associated domain	ENSG00000245322,SLC39A8,TET2,TBCK
rs1154430	circRNA region
rs11030403	Topologically associated domain	BDNF-AS,ENSG00000254530
rs12633520	circRNA region
rs2068834	circRNA region,Topologically associated domain	PLB1,ATAD2B
rs55896768	circRNA region,Topologically associated domain	PRKCA,CEP112,ENSG00000267659,BPTF,HELZ,MAP2K6
rs11928368	Topologically associated domain	CADM2,LINC00971,ZNF717
rs62057146	circRNA region
rs11869096	Topologically associated domain	PLEKHM1
rs594591	lncRNA region
rs4371672	Chromatin interactive region	PAICS,PPAT
rs755555	circRNA region,Topologically associated domain,TF binding region	ENSG00000255197,DGKZ
rs10835381	circRNA region,Topologically associated domain	BDNF-AS,ENSG00000254530
rs35940771	circRNA region
rs2365466	circRNA region,Topologically associated domain	CEP112,LINC00511,ENSG00000267659,BPTF,FAM20A,CACNG5,LRRC37A3,HELZ,MAP2K6
rs6863316	Topologically associated domain	ENSG00000253693,ENSG00000241956,TENM2,WWC1
rs294382	circRNA region,Chromatin interactive region,TF binding region	MPPED2
rs55960528	Chromatin interactive region	MAPT
rs10514904	circRNA region,Chromatin interactive region	RNU7-101P
rs10475853	Topologically associated domain	ENSG00000253693,ENSG00000241956,TENM2,WWC1
rs17577877	circRNA region,Chromatin interactive region	RNU7-101P
rs12402104	circRNA region,Topologically associated domain	ZYG11B,RAB3B,TCEANC2,LRP8,USP24,YIPF1,TTC39A
rs7936948	circRNA region
rs62086898	Topologically associated domain,Chromatin interactive region	ENSG00000267009,MAP3K3,HELZ,KPNA2,MAP2K6
rs7935528	circRNA region
rs57153235	circRNA region
rs140280172	circRNA region,Chromatin interactive region	LAMTOR3
rs9298002	circRNA region
rs4791048	circRNA region,Topologically associated domain	CEP112,LINC00511,ENSG00000267659,BPTF,FAM20A,CACNG5,LRRC37A3,HELZ,MAP2K6
rs13280926	circRNA region
rs6893866	Topologically associated domain	ENSG00000253693,ENSG00000241956,TENM2,WWC1
rs62061811	circRNA region
rs726010	Chromatin interactive region	CNNM2
rs10134892	Topologically associated domain	ENSG00000259097,SETD3
rs71580759	circRNA region
rs12150064	circRNA region
rs3099439	circRNA region,Chromatin interactive region	TMEM161B
rs35950880	Chromatin interactive region,TF binding region	LINC00674,SLC16A6,SH3GL1P3
rs7905987	circRNA region,Topologically associated domain	ZNF365
rs34662244	Chromatin interactive region	PGBD1,HIST1H2BL,ZNF165
rs1029927	circRNA region
rs62060835	circRNA region
rs10838769	circRNA region
rs112197756	circRNA region
rs72930763	circRNA region
rs12774047	circRNA region
rs4506106	circRNA region,Topologically associated domain	CARD11,SDK1
rs2084812	Topologically associated domain	SLC9A2
rs62061808	circRNA region,Chromatin interactive region	KANSL1-AS1
rs35301639	circRNA region
rs17661385	circRNA region,Chromatin interactive region	RNU7-101P
rs12219247	Chromatin interactive region	CNNM2,ENSG00000259006,C10orf32-ASMT,C10orf32
rs2167542	Topologically associated domain	SLC9A2
rs7935521	circRNA region
rs6891239	circRNA region
rs73004625	Topologically associated domain	ENSG00000243347
rs62331150	Chromatin interactive region	STT3B
rs2450516	circRNA region,Topologically associated domain	FAXC,ENSG00000271860
rs12714636	Topologically associated domain	CADM2,ENSG00000239440
rs7580486	circRNA region
rs78452260	circRNA region,Topologically associated domain	CEP112,LINC00511,ENSG00000267659,BPTF,FAM20A,CACNG5,LRRC37A3,HELZ,MAP2K6
rs10092649	circRNA region
rs3935637	Topologically associated domain	PLEKHM1
rs7498665	circRNA region,Chromatin interactive region	TUFM,
rs9923589	circRNA region
rs1357312	circRNA region
rs2009181	circRNA region
rs2454205	circRNA region,Topologically associated domain	ENSG00000245322,SLC39A8,TET2,TBCK
rs62063856	Topologically associated domain	MAPT
rs62061809	circRNA region
rs11738927	Topologically associated domain	ENSG00000253693,ENSG00000241956,TENM2,WWC1
rs35806405	circRNA region
rs56301633	Topologically associated domain	MAPT
rs9375321	circRNA region,Topologically associated domain	ENSG00000271860
rs34969608	circRNA region
rs12467476	circRNA region,Topologically associated domain	PLB1,ATAD2B
rs12448486	circRNA region
rs3757138	circRNA region
rs4752857	circRNA region
rs79310499	Topologically associated domain	ENSG00000259097,SETD3
rs174389	circRNA region
rs4840525	Topologically associated domain	XKR6
rs7141639	Topologically associated domain	SETD3
rs11039415	circRNA region
rs540395	Topologically associated domain	CAMKMT,PLEKHH2
rs62055552	Chromatin interactive region	MAPT
rs7933262	Topologically associated domain	BDNF-AS,ENSG00000254530
rs55780945	circRNA region,Topologically associated domain	MAPT
rs1499974	Topologically associated domain	LSAMP,ENSG00000243276
rs9282862	circRNA region,Chromatin interactive region	CCDC101
rs501299	circRNA region,Chromatin interactive region	KDM4A
rs62054825	Topologically associated domain	PLEKHM1
rs10883840	circRNA region
rs13146090	circRNA region
rs1693481	circRNA region
rs11039336	circRNA region
rs62060768	circRNA region
rs974292	circRNA region
rs9393713	circRNA region,lncRNA region
rs62061789	circRNA region,Chromatin interactive region	KANSL1-AS1
rs11894393	Topologically associated domain	SLC9A2
rs28594861	Topologically associated domain	LHPP
rs2106784	Topologically associated domain	PLEKHM1
rs12714415	Topologically associated domain	MYT1L
rs118202	circRNA region
rs55746869	circRNA region,Topologically associated domain	JUP,CA10,PLEKHM1
rs62060760	circRNA region
rs10271049	circRNA region,Chromatin interactive region	BUD31,PDAP1
rs11867401	circRNA region,Topologically associated domain,TF binding region	PRKCA,CEP112,ENSG00000267659,BPTF,FAM20A,FOXK2,HELZ,SMURF2,ENSG00000266717,MAP2K6
rs6725549	Chromatin interactive region	LINC00910
rs199518	circRNA region
rs56030824	circRNA region,Topologically associated domain	CKAP5
rs11039419	circRNA region
rs77063768	Topologically associated domain	PLEKHM1
rs11030385	circRNA region,Topologically associated domain	BDNF-AS,ENSG00000254530
rs11039392	circRNA region,Chromatin interactive region	FNBP4
rs55793500	circRNA region
rs1112428	circRNA region,Topologically associated domain	SDK1
rs6499241	circRNA region
rs17572467	circRNA region,Topologically associated domain,lncRNA region	MAPT
rs8081806	Topologically associated domain	ENSG00000267009,MAP3K3,HELZ,MAP2K6
rs13088311	Topologically associated domain	CADM2,LINC00971
rs62061771	circRNA region,Chromatin interactive region	KANSL1-AS1
rs56299858	Topologically associated domain	PLEKHM1
rs6778926	circRNA region
rs1662057	circRNA region
rs11191436	circRNA region
rs62264764	circRNA region,Topologically associated domain	ENSG00000239268,LSAMP
rs56113217	Topologically associated domain,Chromatin interactive region	PLEKHM1,SPPL2C
rs1202233	circRNA region
rs4792891	TF binding region,lncRNA region	MAPT-AS1
rs4841434	Chromatin interactive region,TF binding region	ENSG00000248896
rs33817	Topologically associated domain	ENSG00000251574
rs4508773	circRNA region
rs7503834	circRNA region,Topologically associated domain	ENSG00000267009,MAP3K3,HELZ,MAP2K6
rs2268890	circRNA region
rs1858600	circRNA region,Topologically associated domain	ZRANB2-AS2,NEGR1
rs2139890	circRNA region,Topologically associated domain	JUP,CA10,PLEKHM1
rs6532815	circRNA region
rs12210016	circRNA region
rs17649866	circRNA region
rs11742502	Topologically associated domain	ENSG00000253693,ENSG00000241956,TENM2,WWC1
rs12495178	circRNA region
rs17769490	Topologically associated domain	PLEKHM1
rs56255439	circRNA region
rs13167965	circRNA region
rs12794570	circRNA region
rs55947022	circRNA region
rs12534906	circRNA region,Topologically associated domain	CARD11,SDK1
rs7627780	Topologically associated domain	CADM2,LINC00971,ZNF717
rs7017527	Topologically associated domain	SLC26A7,ENSG00000253901,ENSG00000248858
rs972089	circRNA region
rs11154193	Topologically associated domain	FAXC,ENSG00000271860
rs10460853	Topologically associated domain	ENSG00000243347,ZIC1
rs113120855	circRNA region,TF binding region	RNU7-101P
rs9938213	circRNA region
rs2002154	Chromatin interactive region	PAICS,PPAT
rs10445338	circRNA region,Topologically associated domain	MAPT
rs1901985	Topologically associated domain	CADM2,LINC00971
rs7948468	circRNA region
rs7947218	Topologically associated domain	BDNF-AS,ENSG00000254530
rs13397165	Topologically associated domain	MYT1L
rs13022873	circRNA region,Topologically associated domain	PLB1,ATAD2B
rs35572189	Chromatin interactive region	MIR3186
rs4868800	Topologically associated domain	ENSG00000253693,ENSG00000241956,TENM2
rs332833	circRNA region
rs7928842	circRNA region,Chromatin interactive region	CELF1
rs540860	Topologically associated domain	ARHGEF12
rs112333322	circRNA region
rs4752873	circRNA region
rs78613234	circRNA region
rs3418	lncRNA region
rs12938476	TF binding region	ENSG00000265964
rs7927771	circRNA region
rs4290215	Topologically associated domain	BDNF-AS,ENSG00000254530
rs6731348	Chromatin interactive region	LINC00910
rs62057158	circRNA region
[truncated: 2,380 more rows]
