# Supplementary material for: A genome-wide multiphenotypic association analysis identified candidate genes and gene ontology shared by four common risky behaviors
Source: Aging (Albany NY). 2020 Feb 22;12(4):3287–97. doi: 10.18632/aging.102812 (PMC7066886; doi:10.18632/aging.102812)
Supplement: Supplementary Table 2 [file aging-12-102812-s005..xlsx]

## Sheet: Table S2
Table S2.List of the four risky behaviors associated MeQTL SNPs and corresponding genes
Rs_ID	Target genes
rs3811802	ADH1B
rs73832804	ADH1B
rs283415	ADH1B
rs1789912	ADH1B
rs1789911	ADH1C
rs1693482	ADH1C
rs904096	ADH1C
rs1662060	ADH1C
rs1662048	ADH1C
rs1229858	ADH1C
rs1789912	ADH1C
rs12649804	ADH1C
rs1442492	ADH1C
rs1154433	ADH1C
rs3910713	ADH1C
rs17028973	ADH7
rs7674049	ARHGAP10
rs2139890	ARHGAP27
rs80184151	ARHGAP27
rs72833340	ARID5B
rs36045108	ARL3
rs11976018	ARPC1A
rs151179	ATXN2L
rs7206214	ATXN2L
rs113029997	ATXN2L
rs62036622	ATXN2L
rs8062405	ATXN2L
rs62036622	ATXN2L
rs34205595	BANK1
rs6699397	BARHL2
rs7103411	BDNF-AS1
rs10742179	BDNF-AS1
rs10108511	BLK
rs11250099	BLK
rs11991139	BLK
rs11991139	BLK
rs10093053	BLK
rs9650661	BLK
rs6980884	BLK
rs899366	BLK
rs4790908	BPTF
rs4790908	BPTF
rs6504549	BPTF
rs6504549	BPTF
rs8079754	BPTF
rs7221651	BPTF
rs4791212	BPTF
rs8079291	BPTF
rs10445361	BPTF
rs12174639	BTN1A1
rs9393715	BTN3A2
rs13216828	BTN3A2
rs192569	C10orf26
rs1475642	C10orf26
rs619824	C10orf26
rs284855	C10orf26
rs3736922	C10orf26
rs1475642	C10orf26
rs4919683	C10orf26
rs6162	C10orf26
rs12775431	C10orf26
rs7085104	C10orf32
rs3740400	C10orf32
rs7096249	C10orf32
rs3740400	C10orf32
rs7910900	C10orf32
rs1591915	C10orf32
rs10883799	C10orf32-AS3MT
rs71496552	C10orf32-AS3MT
rs10883799	C10orf32-AS3MT
rs10786719	C10orf32-AS3MT
rs12358887	C10orf32-AS3MT
rs12259058	C10orf95
rs1940726	C11orf34
rs7159845	C14orf64
rs199453	C17orf57
rs10179872	C2orf16
rs12464616	C2orf16
rs12464616	C2orf16
rs12641030	C4orf14
rs35514852	C4orf14
rs62310295	C4orf14
rs11732394	C4orf14
rs2858088	C4orf44
rs3818987	C6orf129
rs4870035	C6orf97
rs4302808	C8orf74
rs6601512	C8orf74
rs12451707	CACNG1
rs9818659	CADM2
rs382210	CADM2
rs2171143	CADM2
rs4301023	CADM2
rs9881257	CADM2
rs1994315	CADM2
rs7628129	CADM2
rs1376935	CADM2
rs13095644	CADM2
rs9861451	CADM2
rs9846211	CADM2
rs9865191	CADM2
rs993136	CADM2
rs2117153	CADM2
rs1821349	CADM2
rs9865191	CADM2
rs6791236	CADM2
rs2163971	CADM2
rs11921010	CADM2
rs2163971	CADM2
rs993136	CADM2
rs11921010	CADM2
rs11917490	CADM2
rs2163971	CADM2
rs2033526	CADM2
rs619824	CALHM3
rs4493813	CARD11
rs9940030	CDH8
rs10735131	CDH8
rs9940030	CDH8
rs66717971	CLEC18A
rs151179	CLN3
rs4788083	CLN3
rs7814146	CLU
rs7093470	CNNM2
rs12246739	CNNM2
rs11191586	CNNM2
rs12780134	CNNM2
rs12774513	CNNM2
rs12780134	CNNM2
rs12570528	CNNM2
rs1475642	CNNM2
rs12246739	CNNM2
rs10883826	CNNM2
rs10786719	CNNM2
rs4919684	CNNM2
rs12246739	CNNM2
rs12246739	CNNM2
rs10883800	CNNM2
rs12779263	CNNM2
rs10883826	CNNM2
rs4917992	CNNM2
rs10786719	CNNM2
rs3740392	CNNM2
rs11191467	CNNM2
rs10786719	CNNM2
rs10786719	CNNM2
rs12246739	CNNM2
rs12246739	CNNM2
rs10786719	CNNM2
rs8139	CNNM2
rs12246739	CNNM2
rs12246739	CNNM2
rs2139890	CRHR1
rs62057073	CRHR1
rs80184151	CRHR1
rs80184151	CRHR1
rs80184151	CRHR1
rs62057073	CRHR1
rs80184151	CRHR1
rs62057073	CRHR1
rs17762769	CRHR1
rs62054762	CRHR1
rs62057073	CRHR1
rs62057073	CRHR1
rs80184151	CRHR1
rs80184151	CRHR1
rs62054760	CRHR1
rs55668363	CRHR1
rs16940672	CRHR1
rs80184151	CRHR1
rs1879581	CRHR1
rs16940672	CRHR1
rs55943044	CRHR1
rs80184151	CRHR1
rs62057073	CRHR1
rs80184151	CRHR1
rs55671319	CRHR1
rs80184151	CRHR1
rs62057073	CRHR1
rs80184151	CRHR1
rs80184151	CRHR1
rs80184151	CRHR1
rs80184151	CRHR1
rs80184151	CRHR1
rs17689378	CRHR1
rs62057073	CRHR1
rs80184151	CRHR1
rs80184151	CRHR1
rs80184151	CRHR1
rs62057073	CRHR1
rs62057073	CRHR1
rs80184151	CRHR1
rs16940672	CRHR1
rs62057073	CRHR1
rs80184151	CRHR1
rs80184151	CRHR1
rs55663797	CRHR1
rs62057073	CRHR1
rs80184151	CRHR1
rs16940672	CRHR1
rs62057073	CRHR1
rs16940672	CRHR1
rs55668363	CRHR1
rs62057073	CRHR1
rs12944712	CRHR1
rs16940671	CRHR1
rs6678247	CSMD2
rs6699794	CYB5RL
rs4919683	CYP17A1
rs7896519	CYP17A1
rs12770390	CYP17A1
rs62519796	CYP7B1
rs62519796	CYP7B1
rs1221983	DCC
rs11082925	DCC
rs347543	DCC
rs9287374	DKFZp686O1327
rs1061	DRD2
rs3791137	EBNA1BP2
rs3088215	EIF3C
rs62036622	EIF3C
rs9972768	EIF3C
rs3088215	EIF3C
rs8046545	EIF3C
rs8049439	EIF3C
rs34839	EIF3C
rs151181	EIF3C
rs62036618	EIF3C
rs151179	EIF3C
rs34839	EIF3C
rs151181	EIF3CL
rs151179	EIF3CL
rs151179	EIF3CL
rs151179	EIF3CL
rs34839	EIF3CL
rs8049439	EIF3CL
rs62036618	EIF3CL
rs151181	EIF3CL
rs8046545	EIF3CL
rs7188071	EIF3CL
rs151179	EIF3CL
rs149299	EIF3CL
rs12022778	ELAVL4
rs11780834	EPHX2
rs2409797	FAM66A
rs35353728	FAM66A
rs6983727	FAM66A
rs11991139	FAM66A
rs7822958	FAM86B1
rs11783065	FAM86B1
rs1042701	FAM86B1
rs1042701	FAM86B1
rs1042701	FAM86B1
rs7822958	FAM86B2
rs11783065	FAM86B2
rs1042701	FAM86B2
rs1042701	FAM86B2
rs1042701	FAM86B2
rs12776506	FGF8
rs17689882	FMNL1
rs2177291	FOXP1
rs11720703	FOXP1
rs7783012	FOXP2
rs1514175	FPGT-TNNI3K
rs6604867	FPGT-TNNI3K
rs3765681	FPGT-TNNI3K
rs6604871	FPGT-TNNI3K
rs3765681	FPGT-TNNI3K
rs7752159	FYN
rs2841332	GAPVD1
rs943036	GBF1
rs2010087	GCKR
rs35073769	GCKR
rs10242223	GNA12
rs6462071	GNA12
rs55780735	HAS3
rs2293571	IFT172
rs62036622	IL27
rs16940672	KIAA1267
rs62057073	KIAA1267
rs80184151	KIAA1267
rs199455	KIAA1267
rs16940672	KIAA1267
rs16940672	KIAA1267
rs80184151	KIAA1267
rs80184151	KIAA1267
rs55915917	KIAA1267
rs142167	KIAA1267
rs62057073	KIAA1267
rs56319902	KIAA1267
rs16940672	KIAA1267
rs16940668	KIAA1267
rs199453	KIAA1267
rs2139890	KIAA1267
rs142167	KIAA1267
rs62057073	KIAA1267
rs80184151	KIAA1267
rs62057073	KIAA1267
rs199456	KIAA1267
rs80184151	KIAA1267
rs62057073	KIAA1267
rs9912530	KIAA1267
rs199516	KIAA1267
rs80184151	KIAA1267
rs62057073	KIAA1267
rs199529	KIAA1267
rs62057073	KIAA1267
rs2139890	KIAA1267
rs62057073	KIAA1267
rs80184151	KIAA1267
rs80184151	KIAA1267
rs62057073	KIAA1267
rs62057073	KIAA1267
rs62054761	KIAA1267
rs80184151	KIAA1267
rs62057073	KIAA1267
rs62057073	KIAA1267
rs16940672	KIAA1267
rs17689471	KIAA1267
rs80184151	KIAA1267
rs17762769	KIAA1267
rs80184151	KIAA1267
rs199456	KIAA1267
rs62054760	KIAA1267
rs80184151	KIAA1267
rs62065438	KIAA1267
rs80184151	KIAA1267
rs62057063	KIAA1267
rs62057073	KIAA1267
rs9912530	KIAA1267
rs199513	KIAA1267
rs62057073	KIAA1267
rs62057073	KIAA1267
rs80184151	KIAA1267
rs80184151	KIAA1267
rs240957	KIAA1919
rs28712821	KLB
rs62310771	KLB
rs11940694	KLB
rs62084703	KPNA2
rs11079710	KPNA2
rs7208663	KPNA2
rs62084704	KPNA2
rs11656743	KPNA2
rs1475642	LDB1
rs80184151	LOC100128977
rs16940672	LOC100128977
rs80184151	LOC100128977
rs80184151	LOC100128977
rs80184151	LOC100128977
rs199455	LOC100128977
rs2139890	LOC100128977
rs2139890	LOC100128977
rs80184151	LOC100128977
rs62057073	LOC100128977
rs62057073	LOC100128977
rs62057073	LOC100128977
rs17762769	LOC100128977
rs117646503	LOC100128977
rs13214023	LOC100129636
rs62084702	LOC100499466
rs1302808	LOC100507053
rs1693469	LOC100507053
rs1789913	LOC100507053
rs67662114	LOC222699
rs13214023	LOC222699
rs35353359	LOC401242
rs3924376	LOC440354
rs7355926	LOC440970
rs7355926	LOC440970
rs13082397	LOC440970
rs7355926	LOC440970
rs62057073	LOC644172
rs16940671	LOC644172
rs62057073	LOC644172
rs80184151	LOC644172
rs62057073	LOC644172
rs80184151	LOC644172
rs55865707	LOC644172
rs80184151	LOC644172
rs17689378	LOC644172
rs62057073	LOC644172
rs62057073	LOC644172
rs80184151	LOC644172
rs16940672	LOC644172
rs2139890	LOC644172
rs16940668	LOC644172
rs62065438	LOC644172
rs16940672	LOC644172
rs55915917	LOC644172
rs62057073	LOC644172
rs80184151	LOC644172
rs55915917	LOC644172
rs62054762	LOC644172
rs17689378	LOC644172
rs62057073	LOC644172
rs2139890	LOC644172
rs16940671	LOC644172
rs242951	LOC644172
rs869988	LRP8
rs10888777	LRP8
rs3737983	LRP8
rs17496638	LRPPRC
rs17496618	LRPPRC
rs17496638	LRPPRC
rs62057073	LRRC37A
rs80184151	LRRC37A
rs80184151	LRRC37A
rs17689378	LRRC37A
rs62057073	LRRC37A
rs80184151	LRRC37A
rs16940671	LRRC37A
rs199514	LRRC37A
rs55943044	LRRC37A
rs62057073	LRRC37A
rs55663797	LRRC37A
rs199438	LRRC37A
rs62054760	LRRC37A
rs62057073	LRRC37A
rs17689378	LRRC37A
rs199518	LRRC37A
rs199439	LRRC37A
rs62057101	LRRC37A
rs16940672	LRRC37A
rs16940671	LRRC37A
rs142167	LRRC37A2
rs16940672	LRRC37A2
rs80184151	LRRC37A2
rs62057073	LRRC37A2
rs199517	LRRC37A2
rs62057073	LRRC37A2
rs17689471	LRRC37A2
rs199438	LRRC37A2
rs199530	LRRC37A2
rs62054760	LRRC37A2
rs62057073	LRRC37A2
rs17689378	LRRC37A2
rs16940671	LRRC37A2
rs62057073	LRRC37A2
rs199439	LRRC37A2
rs199517	LRRC37A2
rs199455	LRRC37A2
rs142167	LRRC37A2
rs16940672	LRRC37A2
rs80184151	LRRC37A4
rs80184151	LRRC37A4
rs80184151	LRRC37A4
rs80184151	LRRC37A4
rs80184151	LRRC37A4
rs55943044	LRRC37A4
rs80184151	LRRC37A4
rs80184151	LRRC37A4
rs80184151	LRRC37A4
rs80184151	LRRC37A4
rs80184151	LRRC37A4
rs55943044	LRRC37A4
rs80184151	LRRC37A4
rs16940671	LRRC37A4
rs80184151	LRRC37A4
rs80184151	LRRC37A4
rs5174	MAGOH
rs16940672	MAPT
rs2139890	MAPT
rs55865707	MAPT
rs16940668	MAPT
rs7224296	MAPT
rs55668363	MAPT
rs62057073	MAPT
rs16940671	MAPT
rs62054760	MAPT
rs80184151	MAPT
rs80184151	MAPT
rs80184151	MAPT
rs80184151	MAPT
rs62057073	MAPT
rs62057073	MAPT
rs17689378	MAPT
rs62057073	MAPT
rs62057073	MAPT
rs62057073	MAPT
rs55668363	MAPT
rs62057073	MAPT
rs16940671	MAPT
rs62057073	MAPT
rs16940671	MAPT
rs17689378	MAPT
rs2139890	MAPT
rs62057073	MAPT
rs80184151	MAPT
rs16940665	MAPT
rs2010087	MPV17
rs199455	MRPL45P2
rs7014861	MSRA
rs6601427	MSRA
rs1115866	MSRA
rs6601523	MSRA
rs10096421	MSRA
rs9371536	MTHFD1L
rs7011106	MTMR9
rs2155292	NCAM1
rs7105462	NCAM1
rs4456284	NCAM1
rs10891492	NCAM1
rs10891496	NCAM1
rs10891488	NCAM1
rs4444109	NCAM1
rs7947502	NCAM1
rs3802850	NCAM1
rs4456284	NCAM1
rs12285372	NCAM1
rs3802850	NCAM1
rs7947502	NCAM1
rs7947502	NCAM1
rs3802850	NCAM1
rs56331084	NCAM1
rs7105462	NCAM1
rs3802850	NCAM1
rs10891495	NCAM1
rs12277922	NCAM1
rs12574893	NCAM1
rs10891498	NCAM1
rs10891498	NCAM1
rs1465765	NCAM1
rs1245114	NCAM1
rs1816537	NCAM1
rs1465765	NCAM1
rs1816537	NCAM1
rs1816537	NCAM1
rs10750024	NCAM1
rs1816537	NCAM1
rs7947910	NCAM1
rs1061	NCAM1
rs12222753	NCAM1
rs2005085	NCAM1
rs7947910	NCAM1
rs12287147	NCAM1
rs4937993	NCAM1
rs12576197	NCAM1
rs1436106	NCAM1
rs34781270	NCRNA00240
rs2797543	NEGR1
rs1858600	NEGR1
rs2797543	NEGR1
rs2797543	NEGR1
rs1194286	NEGR1
rs2797543	NEGR1
rs7192543	NFAT5
rs7192543	NFAT5
rs11646575	NFAT5
rs7191292	NFAT5
rs9302604	NFAT5
rs12928404	NFATC2IP
rs2965749	NOB1
rs7189878	NQO1
rs12924052	NQO1
rs7192543	NQO1
rs2965749	NQO1
rs704795	NRBP1
rs11681351	NRBP1
rs12471703	NRBP1
rs80184151	NSF
rs62057073	NSF
rs199530	NSF
rs199455	NSF
rs199436	NSF
rs199438	NSF
rs80184151	NSFP1
rs80184151	NSFP1
rs62057073	NSFP1
rs12246739	NT5C2
rs10883800	NT5C2
rs10786719	NT5C2
rs12246739	NT5C2
rs11191549	NT5C2
rs10883799	NT5C2
rs7096269	NT5C2
rs2066322	NT5C2
rs12246739	NT5C2
rs10071347	ODZ2
rs13159986	ODZ2
rs4869056	ODZ2
rs883322	ODZ2
rs883322	ODZ2
rs2080976	ODZ2
rs986391	ODZ2
rs4868800	ODZ2
rs278016	ODZ2
rs990201	ODZ2
rs11742457	ODZ2
rs10042499	ODZ2
rs990201	ODZ2
rs278016	ODZ2
rs13160227	ODZ2
rs12173126	ODZ2
rs35353359	OR2J3
rs10090024	OTUD6B
rs6827295	PCDH7
rs6827295	PCDH7
rs4503327	PDE4B
rs7534143	PDE4B
rs12729364	PDE4B
rs4503327	PDE4B
rs7528604	PDE4B
rs7534143	PDE4B
rs12088813	PDE4B
rs4255357	PDE4B
rs2503187	PDE4B
rs7534143	PDE4B
rs66717971	PDXDC2P
rs66717971	PDXDC2P
rs2917670	PDXDC2P
rs6682438	PHC2
rs10914684	PHC2
rs1130804	PHC2
rs4547132	PIH1D2
rs6601512	PINX1
rs1115866	PINX1
rs2163379	PINX1
rs2116095	PINX1
rs2116095	PINX1
rs58114621	PKD1L3
rs4870037	PLEKHG1
rs2139890	PLEKHM1
rs117365970	PLEKHM1
rs62057073	PLEKHM1
rs62057073	PLEKHM1
rs62057073	PLEKHM1
rs62057101	PLEKHM1
rs62057073	PLEKHM1
rs62057073	PLEKHM1
rs80184151	PLEKHM1
rs62057073	PLEKHM1
rs62065438	PLEKHM1
rs11811978	PODN
rs7685053	POLR2B
rs3817588	PPM1G
rs12779263	PSD
rs11577403	PTPRF
rs11577403	PTPRF
rs11577403	PTPRF
rs2782641	PTPRF
rs674725	PTPRF
rs2782641	PTPRF
rs516790	PTPRF
rs2004899	PTPRF
rs11210887	PTPRF
rs499257	PTPRF
rs4242161	RANBP17
rs4242161	RANBP17
rs4242161	RANBP17
rs4242161	RANBP17
rs4242161	RANBP17
rs4242161	RANBP17
rs10037007	RANBP17
rs4242161	RANBP17
rs4242161	RANBP17
rs6893705	RASGRF2
rs35318869	REST
rs66619445	REST
rs7766610	REV3L
rs6568677	REV3L
rs181294	REV3L
rs3736168	RFC1
rs62310771	RFC1
rs13123782	RFC1
rs2046330	RHOH
rs2409784	RP1L1
rs7188071	RRN3P2
rs12325113	RRN3P2
rs62036658	SBK1
rs2056476	SDK1
rs34148253	SDK1
rs7788052	SDK1
rs4719944	SDK1
rs35154693	SDK1
rs12535505	SDK1
rs4521670	SDK1
rs1112428	SDK1
rs7791820	SDK1
rs7802106	SDK1
rs7784336	SDK1
rs2222868	SDK1
rs4343999	SDK1
rs10224159	SDK1
rs2140114	SDK1
rs7791898	SDK1
rs10268837	SDK1
rs35154693	SDK1
rs4311565	SDK1
rs1546743	SDK1
rs10264065	SDK1
rs4302734	SDK1
rs2056475	SDK1
rs2056475	SDK1
rs4302734	SDK1
rs9791974	SDK1
rs939913	SDK1
rs2090940	SDK1
rs2090940	SDK1
rs2705608	SDK1
rs56074153	SDK1
rs2705608	SDK1
rs7811384	SDK1
rs2090940	SDK1
rs10225865	SDK1
rs2222868	SDK1
rs11975299	SDK1
rs2090940	SDK1
rs2705608	SDK1
rs955686	SEMA6D
rs955685	SEMA6D
rs1390877	SEMA6D
rs955686	SEMA6D
rs1390876	SEMA6D
rs1390877	SEMA6D
rs955686	SEMA6D
rs281274	SEMA6D
rs34488670	SEMA6D
rs12900091	SEMA6D
rs9646181	SEMA6D
rs1435742	SEMA6D
rs11191436	SH3PXD2A
rs518853	SIX3
rs12986853	SLC4A10
rs2909456	SLC4A10
rs6432708	SLC4A10
rs13023094	SLC4A1AP
rs1823673	SLC9A2
rs325446	SND1
rs759843	SND1
rs325447	SND1
rs3779529	SND1
rs325446	SND1
rs325447	SND1
rs325447	SND1
rs325451	SND1
rs325446	SND1
rs813592	SNX17
rs813592	SNX17
rs7814142	SOX7
rs10883831	SUFU
rs10786719	SUFU
rs62036613	SULT1A1
rs72926972	TCF4
rs72926972	TCF4
rs624244	TCF4
rs55838312	TET2
rs1391439	TET2
rs2726518	TET2
rs7683416	TET2
rs2647230	TET2
rs11952470	TMEM161B
rs3740392	TMEM180
rs7845800	TOX
rs6471756	TOX
rs7000535	TOX
rs6471756	TOX
rs17230460	TOX
rs9487627	TRAF3IP2-AS1
rs6929024	TRAF3IP2-AS1
rs174372	TRAF3IP2-AS1
rs6926543	TRAF3IP2-AS1
rs6926543	TRAF3IP2-AS1
rs174402	TRAF3IP2-AS1
rs35744819	TRIM27
rs6855963	TTC29
rs8049439	TUFM
rs7776346	WISP3
rs80184151	WNT3
rs6499239	WWP2
rs66717971	WWP2
rs4240672	XKR6
rs4240671	XKR6
rs4240672	XKR6
rs11250098	XKR6
rs6980884	XKR6
rs11250099	XKR6
rs6601512	XKR6
rs2736313	XKR6
rs3021494	XKR6
rs10093053	XKR6
rs10089518	XKR6
rs4377462	ZIC4
rs35744819	ZNF323
rs10914684	ZNF362
rs1324481	ZNF362
rs1260333	ZNF512
rs74446114	ZNF512
rs3845687	ZNF513
rs952319	ZNF655
rs11991139	ZNF705D
rs7819412	ZNF705D
rs13256554	ZNF705D
