# Supplementary material for: A genome-wide multiphenotypic association analysis identified candidate genes and gene ontology shared by four common risky behaviors
Source: Aging (Albany NY). 2020 Feb 22;12(4):3287–97. doi: 10.18632/aging.102812 (PMC7066886; doi:10.18632/aging.102812)
Supplement: Supplementary Table 3 [file aging-12-102812-s004..xlsx]

## Sheet: Table S3
Table S3. List of the four risky behaviors associated SNPs and adjacent genes
Rs_ID	Target genes
rs10914684	PHC2
rs4653081	PHC2
rs6678247	PHC2
rs942485	PHC2
rs4652871	PHC2
rs11210860	HYI
rs11210860	PTPRF
rs2782641	PTPRF
rs2842187	PTPRF
rs3000761	PTPRF
rs10890261	PTPRF
rs631248	PTPRF
rs539096	PTPRF
rs516790	PTPRF
rs641365	PTPRF
rs643445	PTPRF
rs11210892	PTPRF
rs617521	PTPRF
rs6588376	ELAVL4
rs12022778	ELAVL4
rs17785382	LRP8
rs11206127	LRP8
rs869987	LRP8
rs869988	LRP8
rs2297660	LRP8
rs437021	NFIA
rs2310754	PDE4B
rs12729364	PDE4B
rs1937456	PDE4B
rs6421482	PDE4B
rs12062815	PDE4B
rs12567613	PDE4B
rs2503185	PDE4B
rs1937444	PDE4B
rs7534143	PDE4B
rs2821295	NEGR1
rs6699731	NEGR1
rs2797543	NEGR1
rs9424977	NEGR1
rs4844694	PLXNA2
rs7548249	PLXNA2
rs4593829	PLXNA2
rs11119094	PLXNA2
rs3739095	GTF3C2
rs4665969	GTF3C2
rs2280737	EIF2B4
rs7563162	PPM1G
rs1728918	PPM1G
rs1060525	PPM1G
rs1260320	GCKR
rs715326	GCKR
rs2293571	GCKR
rs780094	GCKR
rs8179252	GCKR
rs13030345	MRPL33
rs13030345	RBKS
rs2568464	BIRC6
rs2568464	TTC27
rs359233	BCL11A
rs359250	BCL11A
rs359255	BCL11A
rs9309323	BCL11A
rs4671378	BCL11A
rs4671379	BCL11A
rs7582445	BCL11A
rs4671383	BCL11A
rs2160067	BCL11A
rs2110398	BCL11A
rs955657	BCL11A
rs4672378	BCL11A
rs951807	BCL11A
rs4672381	BCL11A
rs907573	BCL11A
rs17402063	BCL11A
rs4672384	BCL11A
rs2419903	BCL11A
rs4671387	BCL11A
rs1445649	KCNJ3
rs2591140	KCNJ3
rs2652434	KCNJ3
rs2177291	FOXP1
rs9289748	ZIC1
rs10937921	RGS12
rs10034048	PCDH7
rs16884384	PCDH7
rs6448745	PCDH7
rs13123782	RFC1
rs10033019	RFC1
rs2412761	SPINK2
rs2412761	REST
rs6839166	SPINK2
rs6839166	REST
rs9685436	SPINK2
rs9685436	REST
rs4339274	SPINK2
rs4339274	REST
rs13125082	REST
rs17087358	POLR2B
rs2271808	IGFBP7
rs1373244	TSPAN5
rs1373244	EIF4E
rs6843891	TSPAN5
rs6843891	EIF4E
rs4699680	TSPAN5
rs4699680	EIF4E
rs3811802	ADH1A
rs3811802	ADH1B
rs2173201	ADH1A
rs2173201	ADH1B
rs1789896	ADH1B
rs1789896	ADH1A
rs2298753	ADH1C
rs2298753	ADH1A
rs2298753	ADH1B
rs1614972	ADH1C
rs1614972	ADH1A
rs1614972	ADH1B
rs1789898	ADH1A
rs1789898	ADH1B
rs1789898	ADH1C
rs1693476	ADH1B
rs1693476	ADH1A
rs1693476	ADH1C
rs1789911	ADH1A
rs1789911	ADH1C
rs1789911	ADH1B
rs1154435	ADH1C
rs1154435	ADH7
rs1302808	ADH7
rs1302808	ADH1C
rs1908963	ADH7
rs1908963	ADH1C
rs12648443	ADH1C
rs12648443	ADH7
rs1372680	ADH7
rs1372680	ADH1C
rs10516440	ADH1C
rs10516440	ADH7
rs1442493	ADH7
rs1442493	ADH1C
rs4699748	ADH7
rs4699748	ADH1C
rs17028973	ADH7
rs17028973	ADH1C
rs2101975	PPA2
rs2726475	PPA2
rs6893705	MSH3
rs6893705	RASGRF2
rs9379851	BTN3A2
rs9358932	BTN3A2
rs9379855	BTN3A2
rs9393713	BTN3A2
rs9393713	BTN3A3
rs9393713	BTN3A3
rs2073529	BTN3A3
rs2073529	BTN3A3
rs2073529	BTN3A2
rs1977	BTN3A2
rs1977	BTN3A3
rs2734971	HLA-A
rs240989	REV3L
rs173287	REV3L
rs6937734	REV3L
rs9400476	REV3L
rs4945881	REV3L
rs6926543	FYN
rs2240384	PTCD1
rs9641538	MDFIC
rs4730682	MDFIC
rs4730682	TFEC
rs2533148	DPP6
rs2533145	DPP6
rs2928843	DPP6
rs7836366	SOX7
rs7010590	MTMR9
rs2409745	MTMR9
rs2736313	MTMR9
rs920047	MTMR9
rs958648	MTMR9
rs2572430	MTMR9
rs6983727	BLK
rs12679960	BLK
rs11778040	CLU
rs11778040	EPHX2
rs6558008	CLU
rs6558008	EPHX2
rs7845800	TOX
rs7829715	TOX
rs6471757	TOX
rs4738732	TOX
rs12115074	TOX
rs1531460	HNF4G
rs1531461	HNF4G
rs2927234	HNF4G
rs2977332	HNF4G
rs843078	RUNX1T1
rs843082	RUNX1T1
rs859879	RUNX1T1
rs843087	RUNX1T1
rs6994132	RUNX1T1
rs4129243	RUNX1T1
rs7819525	RUNX1T1
rs12545507	RUNX1T1
rs4443623	RUNX1T1
rs12550364	RUNX1T1
rs6993429	RUNX1T1
rs4584113	RUNX1T1
rs4345518	RUNX1T1
rs10956807	RUNX1T1
rs4480073	RUNX1T1
rs4642597	RUNX1T1
rs10090024	RUNX1T1
rs9299331	NR4A3
rs10819659	NR4A3
rs359592	GAPVD1
rs979534	KRT8
rs11255908	KRT8
rs2588978	ARID5B
rs2588985	ARID5B
rs1444466	ARID5B
rs7922394	ARID5B
rs4948487	ARID5B
rs7904252	ARL3
rs7904396	ARL3
rs7897654	CNNM2
rs10883802	CNNM2
rs3897402	CNNM2
rs12783467	CNNM2
rs7899622	CNNM2
rs11191487	CNNM2
rs12248123	CNNM2
rs10509757	CNNM2
rs11191494	CNNM2
rs10883817	CNNM2
rs7894959	CNNM2
rs7898770	CNNM2
rs10883820	CNNM2
rs11191506	CNNM2
rs11191506	CNNM2
rs12246739	CNNM2
rs10218853	CNNM2
rs7073323	CNNM2
rs11191530	CNNM2
rs7089680	CNNM2
rs10883826	CNNM2
rs12785223	NT5C2
rs12785223	CNNM2
rs7074395	NT5C2
rs7074395	CNNM2
rs3736922	NT5C2
rs3781282	NT5C2
rs3781281	NT5C2
rs3781281	NT5C2
rs11191554	NT5C2
rs1926029	NT5C2
rs2148198	NT5C2
rs3977751	NT5C2
rs10883839	NT5C2
rs10786744	NT5C2
rs10748839	NT5C2
rs11191606	NT5C2
rs6265	BDNF
rs6265	BDNF
rs11030104	BDNF
rs11030104	BDNF
rs7103411	BDNF
rs16917237	BDNF
rs12419325	METT5D1
rs11030382	METT5D1
rs7952220	METT5D1
rs11030385	METT5D1
rs10767729	METT5D1
rs10835383	METT5D1
rs10835384	METT5D1
rs7935241	METT5D1
rs7934432	METT5D1
rs2356009	METT5D1
rs11570094	MYBPC3
rs4992357	SPI1
rs11605672	SPI1
rs4752999	SPI1
rs17788930	FNBP4
rs6485775	FNBP4
rs4752797	SEC61B
rs10838782	SEC61B
rs12361256	SEC61B
rs4937870	NCAM1
rs2212450	NCAM1
rs10789931	NCAM1
rs7126748	NCAM1
rs7110628	NCAM1
rs10502161	NCAM1
rs10502163	NCAM1
rs11214442	NCAM1
rs2155287	NCAM1
rs2212449	NCAM1
rs1940726	NCAM1
rs1940724	NCAM1
rs10891487	NCAM1
rs4595579	NCAM1
rs17114685	NCAM1
rs17114687	NCAM1
rs1940733	NCAM1
rs7926312	NCAM1
rs17114689	NCAM1
rs11214468	NCAM1
rs1892983	NCAM1
rs17114702	NCAM1
rs17114705	NCAM1
rs7105462	NCAM1
rs3802847	NCAM1
rs10891495	NCAM1
rs12575544	NCAM1
rs1465765	NCAM1
rs12794745	NCAM1
rs11214500	NCAM1
rs11214503	NCAM1
rs2005086	NCAM1
rs2853194	NCAM1
rs1273044	NCAM1
rs1436106	NCAM1
rs4937993	NCAM1
rs10891510	NCAM1
rs1245133	NCAM1
rs4936263	NCAM1
rs4630328	DRD2
rs11601054	DRD2
rs540860	SORL1
rs663175	SORL1
rs647905	SORL1
rs531294	SORL1
rs593094	SEMA6D
rs6493273	SEMA6D
rs578458	SEMA6D
rs635106	SEMA6D
rs1486899	SEMA6D
rs1486901	SEMA6D
rs557899	SEMA6D
rs653749	SEMA6D
rs1390876	SEMA6D
rs1390877	SEMA6D
rs591143	SEMA6D
rs2132661	SEMA6D
rs281291	SEMA6D
rs4511474	SEMA6D
rs281296	SEMA6D
rs962949	SEMA6D
rs281297	SEMA6D
rs8039398	SEMA6D
rs9646181	SEMA6D
rs4775699	SEMA6D
rs4775699	SEMA6D
rs1898110	SEMA6D
rs1912635	SEMA6D
rs12902636	SEMA6D
rs4932370	BLM
rs4932370	FURIN
rs7403809	ERCC4
rs8055219	ERCC4
rs8053520	ERCC4
rs4456522	ERCC4
rs8049439	ATXN2L
rs8049439	ATXN2L
rs8049439	ATXN2L
rs8062405	ATXN2L
rs8062405	ATXN2L
rs8062405	ATXN2L
rs12443881	ATXN2L
rs12443881	ATXN2L
rs12443881	ATXN2L
rs11643079	ZNF423
rs10735131	CDH8
rs8049450	CDH8
rs11641766	CDH8
rs12927313	CDH8
rs7498886	CDH8
rs9925201	CDH8
rs2161630	NFAT5
rs8055756	NFAT5
rs2965749	NQO1
rs7186296	WWP2
rs30432	DHX38
rs1724422	CRHR1
rs1724425	CRHR1
rs1526123	CRHR1
rs11655470	CRHR1
rs12938476	CRHR1
rs12938476	CRHR1
rs12944235	CRHR1
rs12944712	CRHR1
rs171440	CRHR1
rs242559	MAPT
rs754593	MAPT
rs199436	NSF
rs142167	NSF
rs199452	NSF
rs199498	WNT3
rs745570	CBX4
rs3902020	DCC
rs1145247	DCC
rs11082925	DCC
rs347541	DCC
rs12607228	DCC
rs2119839	DCC
rs17681071	DCC
rs1221983	DCC
rs1145250	DCC
rs1221969	DCC
rs948594	DCC
rs12326693	TCF4
rs7244737	TCF4
rs937831	TCF4
rs1549319	TCF4
rs6112513	SLC24A3
