# Supplementary material for: A genome-wide multiphenotypic association analysis identified candidate genes and gene ontology shared by four common risky behaviors
Source: Aging (Albany NY). 2020 Feb 22;12(4):3287–97. doi: 10.18632/aging.102812 (PMC7066886; doi:10.18632/aging.102812)
Supplement: Supplementary Table 4 [file aging-12-102812-s001..xlsx]

## Sheet: Table S4
Table S4. Gene set enrichment analysis results of rSNP related genes associated with the four risky behaviors
	GeneSet	adjusted P
Gene ontology enrichment analysis	GO_GENE_SILENCING	5.73e-12
	GO_NEGATIVE_REGULATION_OF_GENE_EXPRESSION_EPIGENETIC	5.73e-12
	GO_CHROMATIN_SILENCING	1.13e-11
	GO_CHROMATIN_ORGANIZATION	1.69e-08
	GO_REGULATION_OF_GENE_EXPRESSION_EPIGENETIC	1.75e-08
	GO_CHROMOSOME_ORGANIZATION	5.07e-08
	GO_CHROMATIN_ASSEMBLY_OR_DISASSEMBLY	7.1e-07
	GO_DNA_PACKAGING	7.1e-07
	GO_PROTEIN_DNA_COMPLEX_SUBUNIT_ORGANIZATION	3.81e-06
	GO_CHROMATIN_SILENCING_AT_RDNA	0.000113
	GO_GENE_SILENCING_BY_RNA	0.000184
	GO_INNATE_IMMUNE_RESPONSE_IN_MUCOSA	0.000273
	GO_DNA_CONFORMATION_CHANGE	0.000273
	GO_TELOMERE_ORGANIZATION	0.00068
	GO_NEGATIVE_REGULATION_OF_NITROGEN_COMPOUND_METABOLIC_PROCESS	0.000942
	GO_PROTEIN_HETEROTETRAMERIZATION	0.00107
	GO_CELL_CYCLE	0.00256
	GO_CELLULAR_MACROMOLECULAR_COMPLEX_ASSEMBLY	0.00268
	GO_ORGAN_OR_TISSUE_SPECIFIC_IMMUNE_RESPONSE	0.00268
	GO_DNA_REPLICATION_DEPENDENT_NUCLEOSOME_ORGANIZATION	0.00268
	GO_NEGATIVE_REGULATION_OF_GENE_EXPRESSION	0.00327
	GO_IMP_METABOLIC_PROCESS	0.00334
	GO_POSITIVE_REGULATION_OF_GENE_EXPRESSION_EPIGENETIC	0.00495
	GO_ESTABLISHMENT_OF_LOCALIZATION_BY_MOVEMENT_ALONG_MICROTUBULE	0.00501
	GO_EPITHELIAL_CELL_APOPTOTIC_PROCESS	0.00521
	GO_CYTOSKELETON_DEPENDENT_INTRACELLULAR_TRANSPORT	0.00529
	GO_NUCLEOBASE_METABOLIC_PROCESS	0.00779
	GO_REGULATION_OF_FIBROBLAST_MIGRATION	0.00923
	GO_POSITIVE_REGULATION_OF_PROTEIN_POLYMERIZATION	0.00923
	GO_ORGANELLE_TRANSPORT_ALONG_MICROTUBULE	0.0144
	GO_IMP_BIOSYNTHETIC_PROCESS	0.0154
	GO_NEGATIVE_REGULATION_OF_CELLULAR_SENESCENCE	0.0154
	GO_DIOL_METABOLIC_PROCESS	0.0154
	GO_CELLULAR_RESPONSE_TO_DNA_DAMAGE_STIMULUS	0.0177
	GO_ANTIMICROBIAL_HUMORAL_RESPONSE	0.0206
	GO_HEPATOCYTE_APOPTOTIC_PROCESS	0.0267
	GO_SPHINGOMYELIN_METABOLIC_PROCESS	0.0267
	GO_POSITIVE_REGULATION_OF_INTRACELLULAR_STEROID_HORMONE_RECEPTOR_SIGNALING_PATHWAY	0.0267
	GO_SPHINGOID_METABOLIC_PROCESS	0.0267
	GO_POST_GOLGI_VESICLE_MEDIATED_TRANSPORT	0.0267
	GO_MICROTUBULE_ORGANIZING_CENTER_ORGANIZATION	0.0285
	GO_REGULATION_OF_GENE_SILENCING	0.029
	GO_RNA_CAPPING	0.0307
	GO_MICROTUBULE_BASED_PROCESS	0.0308
	GO_MAINTENANCE_OF_PROTEIN_LOCATION_IN_NUCLEUS	0.0309
	GO_ESTABLISHMENT_OF_NUCLEUS_LOCALIZATION	0.0309
	GO_POSITIVE_REGULATION_OF_MOLECULAR_FUNCTION	0.0309
	GO_CELL_CYCLE_PROCESS	0.0309
	GO_PROTEIN_COMPLEX_BIOGENESIS	0.0363
	GO_REGULATION_OF_DENDRITIC_SPINE_DEVELOPMENT	0.0392
	GO_CELL_CYCLE_G1_S_PHASE_TRANSITION	0.0406
	GO_NEGATIVE_REGULATION_OF_DENDRITE_DEVELOPMENT	0.0434
	GO_RNA_PHOSPHODIESTER_BOND_HYDROLYSIS_ENDONUCLEOLYTIC	0.0456
	GO_ESTABLISHMENT_OF_MITOCHONDRION_LOCALIZATION	0.0456
	GO_RNA_SPLICING_VIA_ENDONUCLEOLYTIC_CLEAVAGE_AND_LIGATION	0.0456
	GO_CELLULAR_RESPONSE_TO_STRESS	0.0456
Disease related gene set enrichment analysis	Autism spectrum disorder or schizophrenia	1.81e-27
	Alcohol use disorder (total score)	1.44e-12
	Neuroticism	2.47e-12
	General cognitive ability	2.47e-12
	Intelligence (MTAG)	8.93e-09
	Tacrolimus trough concentration in kidney transplant patients	1.22e-08
	Facial emotion recognition (sad faces)	4.9e-07
	Squamous cell lung carcinoma	3.1e-06
	Cannabis use	3.28e-06
	Lung cancer in ever smokers	4.03e-06
	Lung cancer	8.01e-06
	Schizophrenia	1.46e-05
	Global electrical heterogeneity phenotypes	1.79e-05
	Serum metabolite levels	3.31e-05
	Blood pressure	3.9e-05
	Self-reported risk-taking behaviour	3.9e-05
	White matter lesion progression	9.72e-05
	Hand grip strength	9.72e-05
	Sarcoidosis (Lofgren's syndrome vs non-Lofgren's syndrome)	9.72e-05
	Body mass index in physically active individuals	9.93e-05
	Male-pattern baldness	0.000104
	Hip circumference	0.000104
	Parkinson's disease	0.000319
	Body mass index (joint analysis main effects and physical activity interaction)	0.00032
	Metabolite levels (HVA-5-HIAA Factor score)	0.000346
	Intraocular pressure	0.000596
	Daytime sleep phenotypes	0.00115
	Systolic blood pressure	0.00124
	Intelligence	0.00124
	Systemic sclerosis (anti-topoisomerase-positive)	0.00129
	Cognitive ability	0.00161
	Systolic blood pressure x alcohol consumption interaction (2df test)	0.00187
	Crohn's disease	0.0019
	Oral cavity cancer	0.0019
	Diffuse cutaneous systemic sclerosis	0.0019
	Alcohol use disorder (consumption score)	0.0019
	Mucinous adenocarcinoma in colorectal cancer	0.00254
	Idiopathic pulmonary fibrosis	0.00256
	Huntington's disease progression	0.00256
	Plasma omega-3 polyunsaturated fatty acid levels (alphalinolenic acid)	0.00279
	Mean arterial pressure x alcohol consumption interaction (2df test)	0.00316
	Educational attainment	0.00317
	Coronary artery disease	0.00352
	BMI in non-smokers	0.00352
	Systolic blood pressure (cigarette smoking interaction)	0.00352
	Sodium levels	0.00352
	Plasma omega-3 polyunsaturated fatty acid levels (docosapentaenoic acid)	0.00352
	Mean arterial pressure	0.00352
	Body mass index	0.00352
	White blood cell count	0.00377
	Multiple system atrophy	0.00419
	Cutaneous malignant melanoma	0.00419
	Exhaled nitric oxide output	0.00419
	Exhaled nitric oxide levels	0.00419
	Delta-5 desaturase activity response to n3-polyunsaturated fat supplement	0.00419
	Plasma omega-6 polyunsaturated fatty acid levels (dihomo-gamma-linolenic acid)	0.00495
	Inflammatory bowel disease	0.00546
	Presence of antiphospholipid antibodies	0.00573
	Body fat percentage	0.00573
	Palmitoleic acid (16:1n-7) levels	0.00573
	Diastolic blood pressure	0.00573
	Pit-and-Fissure caries	0.00577
	Gut microbiota (beta diversity)	0.00675
	Prevalent atrial fibrillation	0.00675
	Possible neuropathic pain in post total joint replacement surgery for osteoarthritis	0.00675
	Early onset atrial fibrillation	0.00675
	Response to citalopram or escitalopram and depression	0.00675
	Chloride levels	0.00772
	Waist circumference	0.00805
	Obesity	0.00846
	Reaction time	0.00849
	Glucose homeostasis traits	0.00851
	Nonalcoholic fatty liver disease	0.00863
	Subcortical brain region volumes	0.00863
	Albumin-globulin ratio	0.00863
	Lung function (FVC)	0.00863
	Diastolic blood pressure (cigarette smoking interaction)	0.00863
	Myopia	0.00864
	Weight	0.00936
	Intracranial volume	0.00936
	Stroke (ischemic)	0.00936
	Putamen volume	0.00936
	Remission after SSRI treatment in MDD or neuroticism	0.00936
	Intracranial aneurysm	0.00947
	Plasma omega-3 polyunsaturated fatty acid level (eicosapentaenoic acid)	0.0101
	Hypertriglyceridemia	0.0103
	Glaucoma	0.0103
	Femoral neck bone mineral density	0.0103
	Red cell distribution width	0.0112
	Cognitive function	0.0117
	Plasma omega-6 polyunsaturated fatty acid levels (adrenic acid)	0.0117
	Stearic acid (18:0) levels	0.0117
	Red blood cell fatty acid levels	0.0117
	Non-small cell lung cancer	0.0117
	Hypertension	0.0118
	BMI (adjusted for smoking behaviour)	0.0118
	Body mass index (joint analysis main effects and smoking interaction)	0.0118
	White matter integrity	0.0118
	Esophageal cancer (squamous cell)	0.0118
	Vigorous physical activity	0.0118
	Acute lymphoblastic leukemia in childhood (B cell precursor)	0.0118
	Response to antidepressants and depression	0.0118
	Waist Circumference - Triglycerides (WC-TG)	0.0118
	Autism spectrum disorder, attention deficit-hyperactivity disorder, bipolar disorder, major depressive disorder, and schizophrenia (combined)	0.0127
	Retinal vascular caliber	0.0131
	Oleic acid (18:1n-9) levels	0.0131
	Tourette's syndrome or obsessive-compulsive disorder	0.0161
	Laryngeal squamous cell carcinoma	0.0166
	Cognitive ability (MTAG)	0.0188
	Plateletcrit	0.0188
	Serum metabolite ratios in chronic kidney disease	0.0188
	Immunoglobulin A	0.0188
	Hemoglobin concentration	0.0192
	Serum metabolite concentrations in chronic kidney disease	0.02
	Social science traits (pleiotropy) (HIPO component 1)	0.0215
	Dehydroepiandrosterone sulphate levels	0.0215
	Metabolite levels (HVA)	0.0215
	Hemostatic factors and hematological phenotypes	0.0215
	Hematocrit	0.0215
	Cadmium levels	0.0217
	Pulse pressure	0.0238
	Waist-to-hip ratio adjusted for BMI	0.0238
	Eating disorders	0.0247
	Molybdenum levels	0.0247
	Diastolic blood pressure x alcohol consumption interaction (2df test)	0.0257
	Systemic lupus erythematosus	0.0257
	Systolic blood pressure x smoking status (ever vs never) interaction (2df test)	0.0257
	Sex hormone levels	0.0257
	Shingles	0.0257
	Longevity (90 years and older)	0.0257
	Acylcarnitine levels	0.0257
	QRS complex (12-leadsum)	0.0257
	Bone mineral density (total hip)	0.0273
	Myocardial infarction	0.0285
	Coronary heart disease	0.029
	Childhood body mass index	0.0311
	Response to fenofibrate (total cholesterol levels)	0.0311
	Post bronchodilator FEV1	0.0311
	Inflammatory bowel disease (early onset)	0.0313
	Dimensional psychopathology (Cognitive)	0.0313
	Interstitial lung disease	0.0313
	Response to zileuton treatment in asthma (FEV1 change interaction)	0.0313
	Mean corpuscular volume	0.0314
	Depression	0.0318
	Plasma omega-6 polyunsaturated fatty acid levels (gamma-linolenic acid)	0.0341
	Periodontitis (CDC/AAP)	0.0341
	Response to TNF inhibitor in rheumatoid arthritis (change in swollen 28-joint count)	0.0373
	Platelet aggregation	0.0373
	Elevated serum carcinoembryonic antigen levels	0.0373
	Alcohol and nicotine co-dependence	0.0373
	Plasma omega-6 polyunsaturated fatty acid levels (linoleic acid)	0.0377
	Post bronchodilator FEV1/FVC ratio	0.041
	Serum uric acid levels in response to allopurinol in gout	0.0426
	Headache	0.0426
	QT interval	0.0432
	Venous thromboembolism adjusted for sickle cell variant rs77121243-T	0.0432
	Subcutaneous adipose tissue	0.0432
	Lung function (FEV1)	0.0432
	Empathy quotient	0.0432
	Moderate to vigorous physical activity levels	0.0432
	Ischemic stroke (cardioembolic)	0.0432
	Immune response to anthrax vaccine	0.0432
	Waist-to-hip ratio adjusted for BMI (age >50)	0.0449
	Social communication problems	0.0458
