# Supplementary material for: A genome-wide multiphenotypic association analysis identified candidate genes and gene ontology shared by four common risky behaviors
Source: Aging (Albany NY). 2020 Feb 22;12(4):3287–97. doi: 10.18632/aging.102812 (PMC7066886; doi:10.18632/aging.102812)
Supplement: Supplementary Table 5 [file aging-12-102812-s002..xlsx]

## Sheet: Table S5
Table S5. Gene set enrichment analysis results of MeQTL related genes associated with the four risky behaviors
	GeneSet	adjusted P
Gene ontology enrichment analysis	GO_NEUROGENESIS	0.00984
	GO_SUBPALLIUM_DEVELOPMENT	0.00984
	GO_HEAD_DEVELOPMENT	0.00984
	GO_CENTRAL_NERVOUS_SYSTEM_NEURON_DIFFERENTIATION	0.00984
	GO_NEURON_DIFFERENTIATION	0.00984
	GO_REGULATION_OF_NEURON_DIFFERENTIATION	0.00984
	GO_ENDOCRINE_SYSTEM_DEVELOPMENT	0.00984
	GO_REGULATION_OF_VOLTAGE_GATED_CALCIUM_CHANNEL_ACTIVITY	0.0106
	GO_REGULATION_OF_NERVOUS_SYSTEM_DEVELOPMENT	0.0113
	GO_DEVELOPMENTAL_INDUCTION	0.0113
	GO_DORSAL_VENTRAL_PATTERN_FORMATION	0.0113
	GO_CENTRAL_NERVOUS_SYSTEM_DEVELOPMENT	0.0159
	GO_REGULATION_OF_EXTENT_OF_CELL_GROWTH	0.0163
	GO_BEHAVIORAL_RESPONSE_TO_COCAINE	0.0166
	GO_MECHANOSENSORY_BEHAVIOR	0.0166
	GO_REGULATION_OF_NEURON_PROJECTION_DEVELOPMENT	0.0175
	GO_FOREBRAIN_NEURON_DEVELOPMENT	0.0175
	GO_ETHANOL_METABOLIC_PROCESS	0.0179
	GO_NEURON_MIGRATION	0.019
	GO_CENTRAL_NERVOUS_SYSTEM_NEURON_DEVELOPMENT	0.0194
	GO_ADENOHYPOPHYSIS_DEVELOPMENT	0.0194
	GO_CYTOKINE_SECRETION	0.0211
	GO_INTERFERON_GAMMA_PRODUCTION	0.0211
	GO_ARP2_3_COMPLEX_MEDIATED_ACTIN_NUCLEATION	0.0211
	GO_CYTOKINE_PRODUCTION	0.0217
	GO_ESTABLISHMENT_OF_MITOCHONDRION_LOCALIZATION	0.0217
	GO_STRIATUM_DEVELOPMENT	0.0217
	GO_REGULATION_OF_ARF_PROTEIN_SIGNAL_TRANSDUCTION	0.0217
	GO_AORTA_DEVELOPMENT	0.0217
	GO_PITUITARY_GLAND_DEVELOPMENT	0.023
	GO_TELOMERE_MAINTENANCE_VIA_TELOMERASE	0.0242
	GO_REGULATION_OF_COLLATERAL_SPROUTING	0.0272
	GO_REGULATION_OF_HORMONE_BIOSYNTHETIC_PROCESS	0.0272
	GO_ERROR_PRONE_TRANSLESION_SYNTHESIS	0.0312
	GO_REGULATION_OF_INTERLEUKIN_2_PRODUCTION	0.0333
	GO_POST_EMBRYONIC_DEVELOPMENT	0.035
	GO_AXIS_SPECIFICATION	0.0352
	GO_NEGATIVE_REGULATION_OF_CALCIUM_ION_TRANSPORT	0.0352
	GO_REGULATION_OF_CELL_DEVELOPMENT	0.0352
	GO_RNA_DEPENDENT_DNA_BIOSYNTHETIC_PROCESS	0.0352
	GO_ACTIN_NUCLEATION	0.0352
	GO_FORMATION_OF_TRANSLATION_PREINITIATION_COMPLEX	0.0388
	GO_ESTABLISHMENT_OF_LOCALIZATION_BY_MOVEMENT_ALONG_MICROTUBULE	0.0388
	GO_REGULATION_OF_GTPASE_ACTIVITY	0.0388
	GO_REACTIVE_OXYGEN_SPECIES_METABOLIC_PROCESS	0.0388
	GO_NEGATIVE_REGULATION_OF_ESTABLISHMENT_OF_PROTEIN_LOCALIZATION	0.0388
	GO_RESPONSE_TO_AUDITORY_STIMULUS	0.0388
	GO_ADRENAL_GLAND_DEVELOPMENT	0.0388
	GO_REACTIVE_OXYGEN_SPECIES_BIOSYNTHETIC_PROCESS	0.0388
	GO_NEGATIVE_REGULATION_OF_VIRAL_TRANSCRIPTION	0.0416
	GO_MOVEMENT_OF_CELL_OR_SUBCELLULAR_COMPONENT	0.0416
	GO_FOREBRAIN_DEVELOPMENT	0.0416
	GO_NEURON_DEVELOPMENT	0.0416
	GO_PROTEIN_IMPORT	0.0421
	GO_PROTEIN_LOCALIZATION_TO_NUCLEUS	0.0421
	GO_REGULATION_OF_CELL_DIFFERENTIATION	0.0421
	GO_ORGANELLE_TRANSPORT_ALONG_MICROTUBULE	0.0421
	GO_FOREBRAIN_REGIONALIZATION	0.0421
	GO_REGULATION_OF_DEVELOPMENTAL_GROWTH	0.0421
	GO_TELOMERE_MAINTENANCE_VIA_TELOMERE_LENGTHENING	0.0444
	GO_NEGATIVE_REGULATION_OF_AXON_GUIDANCE	0.0444
	GO_REGULATION_OF_HORMONE_METABOLIC_PROCESS	0.0444
	GO_TELENCEPHALON_DEVELOPMENT	0.0453
	GO_REGULATION_OF_VIRAL_TRANSCRIPTION	0.0453
	GO_NEGATIVE_REGULATION_OF_PROTEIN_SECRETION	0.0453
	GO_CELL_PROLIFERATION_IN_FOREBRAIN	0.0465
	GO_EMBRYONIC_HEART_TUBE_MORPHOGENESIS	0.0465
	GO_REGULATION_OF_AXONOGENESIS	0.0488
	GO_LOCOMOTION	0.0488
	GO_REGULATION_OF_NEUROBLAST_PROLIFERATION	0.0488
	GO_NEGATIVE_REGULATION_OF_AXONOGENESIS	0.0488
	GO_NEGATIVE_REGULATION_OF_TRANSPORTER_ACTIVITY	0.0488
	GO_CELL_PART_MORPHOGENESIS	0.0495
	GO_REGULATION_OF_CELL_SIZE	0.0495
	GO_PROTEIN_IMPORT_INTO_NUCLEUS_TRANSLOCATION	0.0495
	GO_EMBRYONIC_HINDLIMB_MORPHOGENESIS	0.0495
	GO_NEGATIVE_REGULATION_OF_CALCIUM_ION_TRANSMEMBRANE_TRANSPORT	0.0495
	GO_CYTOSKELETON_DEPENDENT_INTRACELLULAR_TRANSPORT	0.05
	GO_FOREBRAIN_GENERATION_OF_NEURONS	0.05
Disease related gene set enrichment analysis	General cognitive ability	2.23e-18
	Intelligence (MTAG)	5.89e-15
	Self-reported risk-taking behaviour	8.24e-13
	Alcohol use disorder (total score)	5.11e-11
	Hand grip strength	2.58e-10
	Educational attainment	1.01e-08
	Alcohol consumption in current drinkers	4.72e-08
	Body mass index	1.24e-07
	Cognitive ability (MTAG)	1.5e-07
	Alcohol use disorder (consumption score)	1.96e-07
	Inflammatory bowel disease	2.09e-07
	Inflammatory bowel disease (early onset)	1.01e-06
	Remission after SSRI treatment in MDD or neuroticism	6.6e-06
	Sense of smell	6.6e-06
	Retinal vascular caliber	7.99e-06
	Autism spectrum disorder or schizophrenia	7.99e-06
	Crohn's disease	8.71e-06
	Cognitive ability	1.09e-05
	Reaction time	1.43e-05
	Cannabis use	1.48e-05
	Barrett's esophagus	1.48e-05
	Alcohol consumption	1.67e-05
	Blood osmolality (transformed sodium)	1.67e-05
	Hypertriglyceridemia	1.79e-05
	Social science traits (pleiotropy) (HIPO component 1)	2.06e-05
	Neuroticism	3.19e-05
	Cognitive function	3.65e-05
	Male-pattern baldness	3.65e-05
	Schizophrenia	3.96e-05
	Parkinson's disease	6.84e-05
	Subcortical brain region volumes	0.000106
	Systolic blood pressure x alcohol consumption (light vs heavy) interaction (2df test)	0.000115
	Mean arterial pressure x alcohol consumption (light vs heavy) interaction (2df test)	0.000115
	Alzheimer's disease in APOE e4- carriers	0.00015
	Barrett's esophagus or Esophageal adenocarcinoma	0.000161
	Body mass index in physically active individuals	0.000256
	Waist-to-hip ratio adjusted for BMI (age >50)	0.000256
	Intracranial aneurysm	0.000258
	Hip circumference	0.000258
	Sodium levels	0.000283
	Intracranial volume	0.000324
	Parental longevity (father's attained age)	0.000324
	Multiple system atrophy	0.000324
	Autism spectrum disorder, attention deficit-hyperactivity disorder, bipolar disorder, major depressive disorder, and schizophrenia (combined)	0.000359
	Eating disorders	0.000362
	Obesity (early onset extreme)	0.000362
	BMI (adjusted for smoking behaviour)	0.000362
	Body mass index (joint analysis main effects and smoking interaction)	0.000362
	Systemic lupus erythematosus	0.000362
	Body mass index (joint analysis main effects and physical activity interaction)	0.000398
	Body fat percentage	0.000398
	Intelligence	0.000398
	White matter integrity	0.000398
	Waist Circumference - Triglycerides (WC-TG)	0.000398
	Vigorous physical activity	0.000398
	Systolic blood pressure x alcohol consumption interaction (2df test)	0.000414
	Gut microbiota (beta diversity)	0.000427
	White matter lesion progression	0.000554
	Oral cavity cancer	0.000554
	Blood pressure	0.000659
	Diastolic blood pressure (cigarette smoking interaction)	0.000688
	Lung function (FVC)	0.000688
	Panic disorder	0.000737
	Systolic blood pressure (cigarette smoking interaction)	0.000926
	BMI in non-smokers	0.000926
	Intraocular pressure	0.00122
	Congenital heart disease (maternal effect)	0.00122
	Oral cavity and pharyngeal cancer	0.00122
	Joint mobility (Beighton score)	0.00144
	Alcohol and nicotine co-dependence	0.00154
	Nickel levels	0.00155
	Cadmium levels	0.00155
	Waist circumference	0.0018
	Systolic blood pressure in sickle cell anemia	0.0018
	Refractive astigmatism	0.0018
	Alzheimer's disease in APOE e4+ carriers	0.0018
	Nonalcoholic fatty liver disease	0.0022
	Attention deficit hyperactivity disorder	0.00224
	Coronary heart disease	0.00224
	Triglycerides	0.00253
	Information processing speed	0.00257
	Waist-to-hip ratio adjusted for BMI	0.003
	Diastolic blood pressure	0.00301
	Alzheimer's disease	0.00331
	Lung cancer in ever smokers	0.00342
	Idiopathic pulmonary fibrosis	0.00349
	Lung cancer	0.00376
	Systolic blood pressure	0.00405
	Bone ultrasound measurement (broadband ultrasound attenuation)	0.00452
	Diastolic blood pressure x smoking status (ever vs never) interaction (2df test)	0.00504
	Heart rate response to exercise	0.00514
	Systolic blood pressure x smoking status (ever vs never) interaction (2df test)	0.00519
	Prostate cancer	0.0055
	Urinary albumin excretion	0.0055
	Coronary artery disease (myocardial infarction, percutaneous transluminal coronary angioplasty, coronary artery bypass grafting, angina or chromic ischemic heart disease)	0.00601
	Lymphocyte counts	0.00601
	Bone mineral density (total hip)	0.00602
	Coronary artery disease or large artery stroke	0.00602
	Blood sugar levels	0.00602
	Palmitoleic acid (16:1n-7) levels	0.00602
	Albumin-globulin ratio	0.00614
	Myocardial infarction	0.00614
	Lipid traits	0.0066
	Response to fenofibrate (total cholesterol levels)	0.0066
	Mean arterial pressure x alcohol consumption interaction (2df test)	0.00679
	Depression	0.00679
	Chloride levels	0.00722
	Serum metabolite levels	0.00722
	Non-albumin protein levels	0.00722
	Lung adenocarcinoma	0.00722
	Hypertension	0.00723
	Headache	0.00789
	Sleep duration	0.00789
	Phospholipid levels (plasma)	0.00789
	Subcutaneous adipose tissue	0.00789
	Lung function (FEV1)	0.00789
	Systolic blood pressure x smoking status (current vs non-current) interaction (2df test)	0.00804
	Social communication problems	0.0085
	Microalbuminuria	0.0085
	Parental longevity (combined parental attained age, Martingale residuals)	0.00904
	Tonsillectomy	0.00929
	Fasting plasma glucose	0.00986
	Diastolic blood pressure x alcohol consumption interaction (2df test)	0.0114
	Sarcoidosis (Lofgren's syndrome vs non-Lofgren's syndrome)	0.0115
	Endometrial cancer (endometrioid histology)	0.0115
	Takayasu arteritis	0.0127
	White blood cell count	0.0146
	Post bronchodilator FEV1/FVC ratio	0.0148
	Acute lymphoblastic leukemia (childhood)	0.0154
	Endometrial cancer	0.0154
	Hemoglobin A1c levels	0.0168
	Nose size	0.0193
	Manganese levels	0.0197
	Menarche (age at onset)	0.0207
