# Supplementary material for: A genome-wide multiphenotypic association analysis identified candidate genes and gene ontology shared by four common risky behaviors
Source: Aging (Albany NY). 2020 Feb 22;12(4):3287–97. doi: 10.18632/aging.102812 (PMC7066886; doi:10.18632/aging.102812)
Supplement: Supplementary Table 6 [file aging-12-102812-s003..xlsx]

## Sheet: Table S6
Table S6. Gene set enrichment analysis results of genes with SNPs showing association with the four risky behaviors
	GeneSet	adjusted P
Gene ontology enrichment analysis	GO_REGULATION_OF_COLLATERAL_SPROUTING	2.84e-05
	GO_REGULATION_OF_EXTENT_OF_CELL_GROWTH	2.84e-05
	GO_REGULATION_OF_NEURON_DIFFERENTIATION	2.84e-05
	GO_NEGATIVE_REGULATION_OF_NITROGEN_COMPOUND_METABOLIC_PROCESS	2.84e-05
	GO_REGULATION_OF_NERVOUS_SYSTEM_DEVELOPMENT	2.84e-05
	GO_REGULATION_OF_CELL_DEVELOPMENT	0.000103
	GO_NEUROGENESIS	0.000103
	GO_NEGATIVE_REGULATION_OF_PROTEIN_OLIGOMERIZATION	0.000103
	GO_REGULATION_OF_NEURON_PROJECTION_DEVELOPMENT	0.000119
	GO_ETHANOL_METABOLIC_PROCESS	0.000119
	GO_REGULATION_OF_AXONOGENESIS	0.000338
	GO_REGULATION_OF_CELL_SIZE	0.000371
	GO_NEURON_PROJECTION_MORPHOGENESIS	0.00061
	GO_REGULATION_OF_CELL_DIFFERENTIATION	0.00061
	GO_NEURON_PROJECTION_GUIDANCE	0.00116
	GO_REGULATION_OF_VOLTAGE_GATED_CALCIUM_CHANNEL_ACTIVITY	0.00126
	GO_NEURON_PROJECTION_DEVELOPMENT	0.00141
	GO_REGULATION_OF_DEVELOPMENTAL_GROWTH	0.00141
	GO_CELL_MORPHOGENESIS_INVOLVED_IN_NEURON_DIFFERENTIATION	0.00141
	GO_REGULATION_OF_CELL_PROJECTION_ORGANIZATION	0.00153
	GO_POSITIVE_REGULATION_OF_NEURON_DIFFERENTIATION	0.00191
	GO_POSITIVE_REGULATION_OF_NEURON_PROJECTION_DEVELOPMENT	0.00191
	GO_NEGATIVE_REGULATION_OF_AXONOGENESIS	0.00199
	GO_WALKING_BEHAVIOR	0.00201
	GO_NEURON_DEVELOPMENT	0.00201
	GO_POSITIVE_REGULATION_OF_AXONOGENESIS	0.0023
	GO_REGULATION_OF_AMYLOID_PRECURSOR_PROTEIN_CATABOLIC_PROCESS	0.0023
	GO_CELL_DEVELOPMENT	0.0023
	GO_REGULATION_OF_NEURON_DEATH	0.00269
	GO_REGULATION_OF_PROTEIN_OLIGOMERIZATION	0.00269
	GO_REGULATION_OF_CELL_MORPHOGENESIS_INVOLVED_IN_DIFFERENTIATION	0.0029
	GO_NEGATIVE_REGULATION_OF_AXON_EXTENSION	0.003
	GO_NEGATIVE_REGULATION_OF_NERVOUS_SYSTEM_DEVELOPMENT	0.003
	GO_NEGATIVE_REGULATION_OF_NEURON_DIFFERENTIATION	0.003
	GO_DRUG_METABOLIC_PROCESS	0.003
	GO_REGULATION_OF_AXON_GUIDANCE	0.003
	GO_CELL_PART_MORPHOGENESIS	0.003
	GO_POSITIVE_REGULATION_OF_NERVOUS_SYSTEM_DEVELOPMENT	0.003
	GO_NEGATIVE_REGULATION_OF_GENE_EXPRESSION	0.00303
	GO_RESPONSE_TO_ETHANOL	0.00387
	GO_NEGATIVE_REGULATION_OF_DEVELOPMENTAL_GROWTH	0.00397
	GO_TAXIS	0.0047
	GO_REGULATION_OF_PROTEIN_HOMOOLIGOMERIZATION	0.0047
	GO_REGULATION_OF_INCLUSION_BODY_ASSEMBLY	0.0047
	GO_NEGATIVE_REGULATION_OF_DNA_RECOMBINATION	0.0047
	GO_POSITIVE_REGULATION_OF_CELL_DEVELOPMENT	0.00478
	GO_PRIMARY_ALCOHOL_METABOLIC_PROCESS	0.00516
	GO_REGULATION_OF_CELL_GROWTH	0.0056
	GO_POSITIVE_REGULATION_OF_CELL_PROJECTION_ORGANIZATION	0.0056
	GO_NEGATIVE_REGULATION_OF_CELL_DEVELOPMENT	0.0056
	GO_POSITIVE_REGULATION_OF_GENE_EXPRESSION	0.00563
	GO_POSITIVE_REGULATION_OF_DEVELOPMENTAL_GROWTH	0.00596
	GO_MYELOID_LEUKOCYTE_ACTIVATION	0.00671
	GO_ERROR_PRONE_TRANSLESION_SYNTHESIS	0.00671
	GO_POSITIVE_REGULATION_OF_CELL_MORPHOGENESIS_INVOLVED_IN_DIFFERENTIATION	0.00721
	GO_TRANSCRIPTION_FROM_RNA_POLYMERASE_II_PROMOTER	0.00725
	GO_CELL_MORPHOGENESIS_INVOLVED_IN_DIFFERENTIATION	0.00798
	GO_POSITIVE_REGULATION_OF_CATALYTIC_ACTIVITY	0.00851
	GO_LOCOMOTION	0.00851
	GO_REGULATION_OF_TRANSPORT	0.00851
	GO_REGULATION_OF_CELLULAR_COMPONENT_SIZE	0.0089
	GO_REGULATION_OF_MULTICELLULAR_ORGANISMAL_DEVELOPMENT	0.00913
	GO_NEURON_DIFFERENTIATION	0.00962
	GO_NEURON_MIGRATION	0.00975
	GO_MOVEMENT_OF_CELL_OR_SUBCELLULAR_COMPONENT	0.0101
	GO_REGULATION_OF_VIRAL_TRANSCRIPTION	0.0112
	GO_INTERSPECIES_INTERACTION_BETWEEN_ORGANISMS	0.0112
	GO_PROTEIN_SUMOYLATION	0.0113
	GO_NEGATIVE_REGULATION_OF_CELL_MORPHOGENESIS_INVOLVED_IN_DIFFERENTIATION	0.0115
	GO_REGULATION_OF_CELL_MORPHOGENESIS	0.0115
	GO_CELL_PROJECTION_ORGANIZATION	0.0115
	GO_CELLULAR_COMPONENT_MORPHOGENESIS	0.0115
	GO_NEGATIVE_REGULATION_OF_TRANSPORTER_ACTIVITY	0.0122
	GO_NEGATIVE_REGULATION_OF_AXON_GUIDANCE	0.0128
	GO_RESPONSE_TO_ALCOHOL	0.0131
	GO_REGULATION_OF_HYDROLASE_ACTIVITY	0.0131
	GO_T_CELL_MEDIATED_IMMUNITY	0.0137
	GO_NEGATIVE_REGULATION_OF_DENDRITE_DEVELOPMENT	0.0137
	GO_REGULATION_OF_ANATOMICAL_STRUCTURE_SIZE	0.0139
	GO_REGULATION_OF_CALCIUM_ION_TRANSMEMBRANE_TRANSPORTER_ACTIVITY	0.0156
	GO_SECRETION	0.0156
	GO_PROTEIN_IMPORT_INTO_NUCLEUS_TRANSLOCATION	0.0156
	GO_REGULATION_OF_DEFENSE_RESPONSE_TO_VIRUS_BY_VIRUS	0.0156
	GO_NEGATIVE_REGULATION_OF_CALCIUM_ION_TRANSMEMBRANE_TRANSPORT	0.0156
	GO_POSITIVE_REGULATION_OF_MOLECULAR_FUNCTION	0.0156
	GO_HEAD_DEVELOPMENT	0.0159
	GO_SECRETION_BY_CELL	0.016
	GO_NEGATIVE_REGULATION_OF_CELLULAR_AMIDE_METABOLIC_PROCESS	0.016
	GO_POSITIVE_REGULATION_OF_CYTOKINE_PRODUCTION_INVOLVED_IN_IMMUNE_RESPONSE	0.0164
	GO_TRANSCRIPTION_COUPLED_NUCLEOTIDE_EXCISION_REPAIR	0.0164
	GO_POSITIVE_REGULATION_OF_BIOSYNTHETIC_PROCESS	0.0167
	GO_DNA_SYNTHESIS_INVOLVED_IN_DNA_REPAIR	0.0169
	GO_REGULATION_OF_CATION_TRANSMEMBRANE_TRANSPORT	0.017
	GO_MACROPHAGE_ACTIVATION	0.017
	GO_ADULT_BEHAVIOR	0.017
	GO_RESPONSE_TO_OXYGEN_CONTAINING_COMPOUND	0.0182
	GO_REGULATION_OF_ACTIN_FILAMENT_BASED_MOVEMENT	0.0183
	GO_POSITIVE_REGULATION_OF_MULTICELLULAR_ORGANISMAL_PROCESS	0.0196
	GO_NEGATIVE_REGULATION_OF_CELL_PROJECTION_ORGANIZATION	0.0206
	GO_ADULT_LOCOMOTORY_BEHAVIOR	0.0209
	GO_NEGATIVE_REGULATION_OF_CATION_CHANNEL_ACTIVITY	0.0209
	GO_OLIGODENDROCYTE_DEVELOPMENT	0.0209
	GO_CENTRAL_NERVOUS_SYSTEM_DEVELOPMENT	0.0211
	GO_POSITIVE_REGULATION_OF_CELL_GROWTH	0.0216
	GO_SEMAPHORIN_PLEXIN_SIGNALING_PATHWAY	0.0218
	GO_RESPONSE_TO_MONOAMINE	0.0218
	GO_REGULATION_OF_GROWTH	0.0218
	GO_REGULATION_OF_POTASSIUM_ION_TRANSPORT	0.0221
	GO_POST_GOLGI_VESICLE_MEDIATED_TRANSPORT	0.0221
	GO_HEAD_MORPHOGENESIS	0.023
	GO_TRANSCRIPTION_INITIATION_FROM_RNA_POLYMERASE_II_PROMOTER	0.0236
	GO_RESPONSE_TO_ABIOTIC_STIMULUS	0.0242
	GO_POTASSIUM_ION_TRANSPORT	0.0253
	GO_REGULATION_OF_CELLULAR_COMPONENT_MOVEMENT	0.0253
	GO_POSITIVE_REGULATION_OF_GROWTH	0.0253
	GO_NEGATIVE_REGULATION_OF_INNATE_IMMUNE_RESPONSE	0.0253
	GO_CYTOKINE_SECRETION	0.0253
	GO_REGULATION_OF_CATION_CHANNEL_ACTIVITY	0.0254
	GO_FEEDING_BEHAVIOR	0.0262
	GO_POSITIVE_REGULATION_OF_VIRAL_TRANSCRIPTION	0.0262
	GO_PEPTIDYL_TYROSINE_AUTOPHOSPHORYLATION	0.0262
	GO_NUCLEOTIDE_EXCISION_REPAIR_DNA_INCISION	0.0262
	GO_LEUKOCYTE_MEDIATED_IMMUNITY	0.0262
	GO_RECIPROCAL_DNA_RECOMBINATION	0.0276
	GO_NEGATIVE_REGULATION_OF_G_PROTEIN_COUPLED_RECEPTOR_PROTEIN_SIGNALING_PATHWAY	0.0276
	GO_TRANSLESION_SYNTHESIS	0.0294
	GO_RESPONSE_TO_EXTERNAL_STIMULUS	0.0307
	GO_RESPONSE_TO_ELECTRICAL_STIMULUS	0.0325
	GO_NEGATIVE_REGULATION_OF_CELL_GROWTH	0.0325
	GO_LIMBIC_SYSTEM_DEVELOPMENT	0.0325
	GO_BODY_MORPHOGENESIS	0.0325
	GO_NEGATIVE_REGULATION_OF_NEURON_DEATH	0.0325
	GO_DNA_DEPENDENT_DNA_REPLICATION	0.0325
	GO_POSITIVE_REGULATION_OF_CELL_DIFFERENTIATION	0.0333
	GO_INTRA_GOLGI_VESICLE_MEDIATED_TRANSPORT	0.0339
	GO_CELLULAR_RESPONSE_TO_ORGANIC_SUBSTANCE	0.0339
	GO_REGULATION_OF_MULTI_ORGANISM_PROCESS	0.0339
	GO_NEGATIVE_REGULATION_OF_PROTEIN_COMPLEX_ASSEMBLY	0.0341
	GO_LOCOMOTORY_BEHAVIOR	0.0346
	GO_REGULATION_OF_SMOOTH_MUSCLE_CELL_MIGRATION	0.0346
	GO_NEGATIVE_REGULATION_OF_PEPTIDE_SECRETION	0.0346
	GO_REGULATION_OF_PROTEIN_COMPLEX_ASSEMBLY	0.0346
	GO_NEGATIVE_REGULATION_OF_CALCIUM_ION_TRANSPORT	0.0346
	GO_NEGATIVE_REGULATION_OF_CHEMOTAXIS	0.0346
	GO_PURINE_CONTAINING_COMPOUND_CATABOLIC_PROCESS	0.0346
	GO_FORMATION_OF_PRIMARY_GERM_LAYER	0.0346
	GO_REGULATION_OF_CELLULAR_LOCALIZATION	0.0346
	GO_NEGATIVE_REGULATION_OF_CELL_DIFFERENTIATION	0.0346
	GO_NEGATIVE_REGULATION_OF_DNA_METABOLIC_PROCESS	0.0346
	GO_NUCLEOTIDE_EXCISION_REPAIR	0.0346
	GO_SINGLE_ORGANISM_BEHAVIOR	0.0346
	GO_REGULATION_OF_PEPTIDASE_ACTIVITY	0.0346
	GO_REGULATION_OF_NEURON_APOPTOTIC_PROCESS	0.0346
	GO_NEGATIVE_REGULATION_OF_TRANSCRIPTION_FROM_RNA_POLYMERASE_II_PROMOTER	0.0346
	GO_DEPHOSPHORYLATION	0.0351
	GO_LYMPHOCYTE_MEDIATED_IMMUNITY	0.0351
	GO_DNA_BIOSYNTHETIC_PROCESS	0.0351
	GO_CELLULAR_RESPONSE_TO_ALCOHOL	0.0351
	GO_POSTREPLICATION_REPAIR	0.0357
	GO_REGULATION_OF_CALCIUM_ION_TRANSMEMBRANE_TRANSPORT	0.0359
	GO_REGULATION_OF_TRANSPORTER_ACTIVITY	0.0372
	GO_REGULATION_OF_CYTOKINE_PRODUCTION_INVOLVED_IN_IMMUNE_RESPONSE	0.0373
	GO_NEURON_NEURON_SYNAPTIC_TRANSMISSION	0.0373
	GO_REGULATION_OF_DENDRITE_DEVELOPMENT	0.0373
	GO_DNA_TEMPLATED_TRANSCRIPTION_INITIATION	0.0373
	GO_CYTOKINE_PRODUCTION	0.0381
	GO_REGULATION_OF_CELL_DEATH	0.0381
	GO_REGULATION_OF_TRANSCRIPTION_FROM_RNA_POLYMERASE_II_PROMOTER	0.0381
	GO_REGULATION_OF_DNA_RECOMBINATION	0.0381
	GO_BEHAVIOR	0.0381
	GO_REGULATION_OF_CELLULAR_COMPONENT_BIOGENESIS	0.0381
	GO_PLASMA_MEMBRANE_ORGANIZATION	0.0381
	GO_ADAPTIVE_IMMUNE_RESPONSE_BASED_ON_SOMATIC_RECOMBINATION_OF_IMMUNE_RECEPTORS_BUILT_FROM_IMMUNOGLOBULIN_SUPERFAMILY_DOMAINS	0.0381
	GO_POSITIVE_REGULATION_OF_HYDROLASE_ACTIVITY	0.0381
	GO_ENDOCRINE_SYSTEM_DEVELOPMENT	0.0381
	GO_NEGATIVE_REGULATION_OF_ESTABLISHMENT_OF_PROTEIN_LOCALIZATION	0.0397
	GO_DNA_REPLICATION	0.0397
	GO_POSITIVE_REGULATION_OF_SMOOTH_MUSCLE_CELL_PROLIFERATION	0.0397
	GO_OLIGODENDROCYTE_DIFFERENTIATION	0.0397
	GO_DNA_RECOMBINATION	0.0397
	GO_PEPTIDYL_LYSINE_MODIFICATION	0.0397
	GO_REGULATION_OF_POTASSIUM_ION_TRANSMEMBRANE_TRANSPORT	0.0398
	GO_NEGATIVE_REGULATION_OF_CATION_TRANSMEMBRANE_TRANSPORT	0.0398
	GO_MAINTENANCE_OF_CELL_NUMBER	0.0429
	GO_REGULATION_OF_TRANSMEMBRANE_TRANSPORT	0.0429
	GO_REGULATION_OF_CYTOKINESIS	0.0429
	GO_POSITIVE_REGULATION_OF_PRODUCTION_OF_MOLECULAR_MEDIATOR_OF_IMMUNE_RESPONSE	0.0429
	GO_CELLULAR_RESPONSE_TO_OXYGEN_CONTAINING_COMPOUND	0.0439
	GO_REGULATION_OF_BEHAVIOR	0.0439
	GO_POSITIVE_REGULATION_OF_INTERFERON_GAMMA_PRODUCTION	0.0439
	GO_NEGATIVE_REGULATION_OF_NEURON_APOPTOTIC_PROCESS	0.0439
	GO_MESODERM_MORPHOGENESIS	0.044
	GO_SOMATIC_STEM_CELL_POPULATION_MAINTENANCE	0.044
	GO_CELLULAR_RESPONSE_TO_DRUG	0.044
	GO_SYNAPSE_ASSEMBLY	0.0452
	GO_INTERFERON_GAMMA_MEDIATED_SIGNALING_PATHWAY	0.0452
	GO_POSITIVE_REGULATION_OF_NEURON_DEATH	0.0452
	GO_REGULATION_OF_METAL_ION_TRANSPORT	0.0452
	GO_NEGATIVE_REGULATION_OF_CELLULAR_COMPONENT_ORGANIZATION	0.0452
	GO_REGULATION_OF_PROTEIN_LOCALIZATION	0.0452
	GO_REGULATION_OF_CYTOKINE_PRODUCTION	0.0452
	GO_NUCLEOSIDE_PHOSPHATE_CATABOLIC_PROCESS	0.0466
	GO_CENTRAL_NERVOUS_SYSTEM_NEURON_DEVELOPMENT	0.0473
	GO_REGULATION_OF_ADENYLATE_CYCLASE_ACTIVITY	0.0473
	GO_MUSCLE_ORGAN_MORPHOGENESIS	0.0473
	GO_CELL_MOTILITY	0.0473
	GO_SYNAPSE_ORGANIZATION	0.0474
	GO_HIPPOCAMPUS_DEVELOPMENT	0.0479
	GO_ADENYLATE_CYCLASE_ACTIVATING_G_PROTEIN_COUPLED_RECEPTOR_SIGNALING_PATHWAY	0.049
	GO_NEGATIVE_REGULATION_OF_GROWTH	0.049
	GO_NEGATIVE_REGULATION_OF_MULTICELLULAR_ORGANISMAL_PROCESS	0.049
	GO_NEGATIVE_REGULATION_OF_PEPTIDASE_ACTIVITY	0.049
	GO_IMMUNE_EFFECTOR_PROCESS	0.0494
	GO_METAL_ION_TRANSPORT	0.0496
	GO_NEGATIVE_REGULATION_OF_TRANSPORT	0.0497
Disease related gene set enrichment analysis	Alcohol use disorder (total score)	2.77e-08
	Cognitive ability (MTAG)	2.77e-08
	General cognitive ability	2.77e-08
	Alcohol use disorder (consumption score)	7.78e-08
	Intelligence (MTAG)	3.27e-07
	Alzheimer's disease in APOE e4- carriers	3.11e-06
	Cognitive ability	3.17e-06
	Hand grip strength	4.46e-06
	Parental longevity (father's attained age)	5.35e-06
	Autism spectrum disorder or schizophrenia	1.35e-05
	Schizophrenia	2.02e-05
	Parental longevity (combined parental attained age, Martingale residuals)	2.13e-05
	Body mass index	2.13e-05
	Neuroticism	3.95e-05
	Subcortical brain region volumes	5.1e-05
	Reaction time	7.99e-05
	Global electrical heterogeneity phenotypes	9.98e-05
	BMI (adjusted for smoking behaviour)	0.000111
	Body mass index (joint analysis main effects and smoking interaction)	0.000111
	Bipolar disorder lithium response (categorical) or schizophrenia	0.000126
	Response to citalopram or escitalopram and depression	0.000126
	Male-pattern baldness	0.000126
	Intraocular pressure	0.000131
	Multiple system atrophy	0.000131
	Body mass index in physically inactive individuals	0.000131
	Eating disorders	0.000148
	Alcohol consumption	0.000148
	Alcohol consumption in current drinkers	0.000159
	Intracranial volume	0.000159
	Obesity	0.000221
	Chloride levels	0.000221
	Lung function (FVC)	0.000228
	Depression	0.000264
	Menarche (age at onset)	0.000264
	BMI in non-smokers	0.000289
	Diastolic blood pressure	0.000289
	White matter lesion progression	0.000289
	Barrett's esophagus	0.000289
	Self-reported risk-taking behaviour	0.000325
	Body mass index in physically active individuals	0.000602
	Oral cavity and pharyngeal cancer	0.000663
	QT interval (sulfonylurea treatment interaction)	0.000663
	Congenital heart disease (maternal effect)	0.000663
	Daytime sleep phenotypes	0.000724
	Hematocrit	0.000904
	Body mass index (joint analysis main effects and physical activity interaction)	0.000997
	Refractive astigmatism	0.000997
	Rosacea symptom severity	0.00114
	Autism spectrum disorder, attention deficit-hyperactivity disorder, bipolar disorder, major depressive disorder, and schizophrenia (combined)	0.00154
	Sense of smell	0.0017
	Barrett's esophagus or Esophageal adenocarcinoma	0.0017
	BMI in smokers	0.00192
	Idiopathic pulmonary fibrosis	0.00192
	Retinal vascular caliber	0.00192
	Blood urea nitrogen levels	0.00192
	Coronary artery disease (myocardial infarction, percutaneous transluminal coronary angioplasty, coronary artery bypass grafting, angina or chromic ischemic heart disease)	0.00198
	Coffee consumption (cups per day)	0.00213
	Alcohol dependence	0.00213
	Coronary artery disease	0.00225
	IgE levels	0.0024
	Parkinson's disease	0.00254
	Lung adenocarcinoma	0.00254
	Albumin-globulin ratio	0.00254
	Diastolic blood pressure (cigarette smoking interaction)	0.00254
	Myocardial infarction	0.00254
	Heart rate response to exercise	0.00254
	Obesity (early onset extreme)	0.00276
	Blood osmolality (transformed sodium)	0.00276
	Triglycerides	0.00281
	Squamous cell lung carcinoma	0.00294
	Systolic blood pressure (cigarette smoking interaction)	0.00295
	Bone mineral density (total hip)	0.00295
	Coronary artery disease or large artery stroke	0.00295
	Childhood body mass index	0.00328
	Lipid traits	0.00328
	Age at voice drop	0.00361
	Lung cancer	0.00362
	Age-related macular degeneration	0.0037
	Stroke	0.0037
	Lung cancer in never smokers	0.0037
	Phospholipid levels (plasma)	0.00401
	Headache	0.00401
	Weight	0.00401
	Lung cancer in ever smokers	0.00444
	Attention deficit hyperactivity disorder	0.00516
	Migraine	0.00569
	Red blood cell count	0.00608
	Urate levels	0.00633
	Serum albumin level	0.0064
	Fasting blood glucose (BMI interaction)	0.00709
	Acute lymphoblastic leukemia (childhood)	0.00761
	Systemic lupus erythematosus	0.00864
	Menopause (age at onset)	0.00864
	Intracranial aneurysm	0.00864
	Hypertriglyceridemia	0.0087
